# Supplementary material for: Temporal trends in obesity defined by the relative fat mass (RFM) index among adults in the United States from 1999 to 2020: a population-based study
Source: PubMed Central journal article supplement — BMJ Open. 2023 Aug 17;13(8):e071295. doi: 10.1136/bmjopen-2022-071295 (PMC10441088; doi:10.1136/bmjopen-2022-071295), 2023-08-17
Supplement: bmjopen-2022-071295.draft_revisions.pdf [file bmjopen-2022-071295.draft_revisions.pdf]

# BMJ Open

BMJ Open is committed to open peer review. As part of this commitment we make the peer review history of every article we publish publicly available.

When an article is published we post the peer reviewers' comments and the authors' responses online. We also post the versions of the paper that were used during peer review. These are the versions that the peer review comments apply to.

The versions of the paper that follow are the versions that were submitted during the peer review process. They are not the versions of record or the final published versions. They should not be cited or distributed as the published version of this manuscript.

BMJ Open is an open access journal and the full, final, typeset and author-corrected version of record of the manuscript is available on our site with no access controls, subscription charges or pay-per-view fees (<http://bmjopen.bmj.com>).

If you have any questions on BMJ Open's open peer review process please email [info.bmjopen@bmj.com](mailto:info.bmjopen@bmj.com)

# BMJ Open

## **Trends in obesity defined by the relative fat mass (RFM) index among adults in the United States from 1999 to 2020: population-based study**

|                               |                                                                                                                                                                                      |
|-------------------------------|--------------------------------------------------------------------------------------------------------------------------------------------------------------------------------------|
| Journal:                      | <i>BMJ Open</i>                                                                                                                                                                      |
| Manuscript ID                 | bmjopen-2022-071295                                                                                                                                                                  |
| Article Type:                 | Original research                                                                                                                                                                    |
| Date Submitted by the Author: | 22-Dec-2022                                                                                                                                                                          |
| Complete List of Authors:     | Woolcott, Orison; Ronin Institute; Institute for Globally Distributed Open Research and Education (IGDORE)<br>Seuring, Till; Luxembourg Institute of Socio-Economic Research (LISER) |
| Keywords:                     | EPIDEMIOLOGY, PUBLIC HEALTH, General endocrinology < DIABETES & ENDOCRINOLOGY, GENERAL MEDICINE (see Internal Medicine)                                                              |
|                               |                                                                                                                                                                                      |

SCHOLARONE™  
Manuscripts

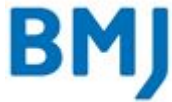

I, the Submitting Author has the right to grant and does grant on behalf of all authors of the Work (as defined in the below author licence), an exclusive licence and/or a non-exclusive licence for contributions from authors who are: i) UK Crown employees; ii) where BMJ has agreed a CC-BY licence shall apply, and/or iii) in accordance with the terms applicable for US Federal Government officers or employees acting as part of their official duties; on a worldwide, perpetual, irrevocable, royalty-free basis to BMJ Publishing Group Ltd ("BMJ") its licensees and where the relevant Journal is co-owned by BMJ to the co-owners of the Journal, to publish the Work in this journal and any other BMJ products and to exploit all rights, as set out in our [licence](#).

The Submitting Author accepts and understands that any supply made under these terms is made by BMJ to the Submitting Author unless you are acting as an employee on behalf of your employer or a postgraduate student of an affiliated institution which is paying any applicable article publishing charge ("APC") for Open Access articles. Where the Submitting Author wishes to make the Work available on an Open Access basis (and intends to pay the relevant APC), the terms of reuse of such Open Access shall be governed by a Creative Commons licence – details of these licences and which [Creative Commons](#) licence will apply to this Work are set out in our licence referred to above.

Other than as permitted in any relevant BMJ Author's Self Archiving Policies, I confirm this Work has not been accepted for publication elsewhere, is not being considered for publication elsewhere and does not duplicate material already published. I confirm all authors consent to publication of this Work and authorise the granting of this licence.

1  
2  
3 1 **Trends in obesity defined by the relative fat mass (RFM) index among adults in**  
4  
5 **the United States from 1999 to 2020: population-based study**  
6  
7  
8 3

9  
10 4 Orison O. Woolcott, research scientist<sup>1,2,\*</sup>, Till Seuring, postdoctoral fellow<sup>3</sup>  
11  
12 5

13  
14 6 *<sup>1</sup>Ronin Institute, Montclair, NJ, USA; <sup>2</sup>Institute for Globally Distributed Open Research and*  
15  
16 7 *Education (IGDORE), Los Angeles, CA, USA; <sup>3</sup>Luxembourg Institute of Socio-Economic*  
17  
18 8 *Research (LISER), Esch-sur-Alzette, Luxembourg*  
19  
20

21 9  
22  
23 10  
24 11  
25 12  
26 13  
27 14  
28 15  
29 16  
30 16  
31 17 Correspondence:

32 18  
33 19 Orison O. Woolcott, M.D.  
34 20 Ronin Institute  
35 21 Montclair, NJ  
36 22 United States of America  
37 23 Telephone: +1 (323) 253-2562  
38 24 Email: [Orison.Woolcott@gmail.com](mailto:Orison.Woolcott@gmail.com)  
39 25  
40 26

41 27 Abstract word count: 300

42  
43 28 Text word count: 2,922  
44  
45 29

46  
47 30 Keywords: General Obesity, NHANES, Prevalence, Relative Fat Mass, RFM, Trends.  
48  
49  
50  
51  
52  
53  
54  
55  
56  
57

**STRENGTHS AND LIMITATIONS OF THIS STUDY**

- This is the first study to compare the prevalence trends of general obesity by sex, ethnicity (Mexican, European and African American), and age group in adults 20-79 years in the United States using the relative fat mass (RFM) index, a validated surrogate for whole-body fat percentage, and the body mass index.
- We used survey data from nationally representative samples of the non-institutionalized U.S. adults collected by the National Health and Nutrition Examination Survey from 1999 to 2020.
- RFM has a high diagnostic accuracy (91%) for obesity defined by the dual energy X-ray absorptiometry; it requires only measured waist circumference and height; and the diagnosis of general obesity was based on previously validated RFM cutoffs to predict all-cause mortality.
- Estimates of prevalence trends could have been affected by some variability in sampling across survey cycles.
- We did not analyze the prevalence trends for Asian Americans due to the lack of oversampling prior to 2011.

## 1 **ABSTRACT**

2 **Objectives:** The body mass index (BMI) largely underestimates excess body fat, suggesting  
3 that the prevalence of obesity could be underestimated. This study aimed to compare the trends  
4 of general obesity by sex, ethnicity, and age group among adults in the United States using the  
5 relative fat mass (RFM), a validated surrogate for whole-body fat percentage, and the BMI.

6 **Design:** Population-based study

7 **Setting:** U.S. National Health and Nutrition Examination Survey (NHANES), from 1999-2000  
8 through 2017-March 2020.

9 **Participants:** A representative sample of adults 20-79 years in the U.S.

10 **Main outcome measures:** Age-adjusted prevalence of general obesity. RFM-defined obesity  
11 was diagnosed using validated cutoffs to predict all-cause mortality: RFM  $\geq 40\%$  for women and  
12  $\geq 30\%$  for men. BMI-defined obesity was diagnosed using a cutoff of 30 kg/m<sup>2</sup>.

13 **Results:** Analysis included 47,667 adults. Among women, RFM-defined obesity prevalence was  
14 64.7% (95% confidence interval, 62.1 to 67.3%) in 2017-2020, a linear increase of 13.9  
15 percentage points (9.0 to 18.9%;  $P < 0.001$ ) relative to 1999-2000. In contrast, the prevalence of  
16 BMI-defined obesity was 42.2% (39.4 to 45.0%) in 2017-2020. Among men, the corresponding  
17 RFM-defined obesity prevalence was 45.8% (42.0 to 49.7%), a linear increase of 12.0  
18 percentage points (6.6 to 17.3%;  $P < 0.001$ ). In contrast, the prevalence of BMI-defined obesity  
19 was 42.0 (37.8 to 46.3%). The highest prevalence of RFM-defined obesity across years was  
20 observed in older adults (60-79 years) and Mexican Americans, in women and men.  
21 Conversely, the highest prevalence of BMI-defined obesity across years was observed in  
22 middle-age (40-59 years) and older adults, and in African American women.

1  
2  
3  
4  
5  
6  
7  
8  
9  
10  
11  
12  
13  
14  
15  
16  
17  
18  
19  
20  
21  
22  
23  
24  
25  
26  
27  
28  
29  
30  
31  
32  
33  
34  
35  
36  
37  
38  
39  
40  
41  
42  
43  
44  
45  
46  
47  
48  
49  
50  
51  
52  
53  
54  
55  
56  
57  
58  
59  
60

1 **Conclusions:** The use of a surrogate for whole-body fat percentage revealed a much higher  
2 prevalence of general obesity in the U.S. from 1999 to 2020, particularly among women, than  
3 that estimated by the BMI, and detected a disproportionate higher prevalence of general obesity  
4 in older adults and Mexican Americans.

5

For peer review only

## 1 INTRODUCTION

2 The prevalence of obesity (excess body fat) in the United States has doubled from 15.0% in  
3 1976-1980 to 30.9% in 1999-2000 <sup>1</sup>, and it continues to increase <sup>2,3</sup>. The age-adjusted  
4 prevalence of obesity among adults in the U.S. has been estimated at 41.9% in 2017-March  
5 2020 <sup>4</sup>. Obesity diagnosis is based on the body mass index (BMI), an indirect measure of body  
6 fat <sup>5,6</sup>. BMI is calculated as the ratio of body weight in kilograms to the square of the height in  
7 meters <sup>7</sup>. BMI does not distinguish between fat mass and fat-free mass and does not account  
8 for differences in adiposity between women and men <sup>8-12</sup>. A meta-analysis of 25 international  
9 studies comprising nearly 32,000 adults concluded that BMI underestimates ~50% of all  
10 individuals with excess body fat percentage determined by reference techniques <sup>11</sup>, suggesting  
11 that the prevalence of obesity could be largely underestimated among countries.

12 There is robust evidence linking high whole-body fat percentage with increased risk of death <sup>13-</sup>  
13 <sup>20</sup>, supporting the need for a better assessment of body adiposity. Although the limitations of  
14 BMI to assess body adiposity are widely acknowledged <sup>6,8-11,21,22</sup>, BMI remains the most widely  
15 used anthropometric index in clinical practice, epidemiology, and public health, given its  
16 simplicity, very low cost, and its association with several clinical conditions and mortality <sup>6</sup>. The  
17 high cost and time required to assess body adiposity using more accurate techniques such as  
18 dual-energy x-ray absorptiometry (DXA), dual-labeled water, or magnetic resonance, prevents  
19 their use in large populations or clinical practice as part of routine screening.

20 The relative fat mass (RFM) is a simple and low-cost anthropometric index developed to  
21 estimate whole-body fat percentage <sup>23</sup>. RFM is a linear equation based on the ratio of height to  
22 waist circumference that has been validated in Mexican, European, and African Americans <sup>23</sup>,  
23 and in other populations <sup>24-26</sup>. Compared with BMI, RFM resulted in lower obesity  
24 misclassification when DXA was used as the reference method for diagnosing obesity in adults  
25 <sup>24,27</sup>. The accuracy of RFM in diagnosing high body fat percentage is superior to that of BMI



1 among men and similar to BMI among women <sup>23</sup>. In an analysis of a representative sample of  
2 the U.S. adult population (NHANES 1999-2006), RFM had a diagnostic accuracy of 91% (C-  
3 statistic = 0.91) for DXA-defined obesity in women and men <sup>27</sup>.

4 Recent studies have examined the U.S. prevalence trends in obesity using the BMI as  
5 diagnostic tool <sup>3 28 29</sup>. Although data on body fat percentage have also been reported for the U.S.  
6 adult population <sup>28</sup>, no body fat cutoffs were used to diagnose general obesity, and the analyses  
7 were limited to adults 20-59 years only, and for the period 2011-2018. In fact, body composition  
8 has been inconsistently assessed across NHANES survey cycles and across age groups. In  
9 addition, no study has compared the trends of general obesity in the U.S. using the RFM, a  
10 surrogate for body fat percentage, and the BMI. Furthermore, no study has examined current  
11 obesity trends among U.S. adults over a period of nearly 22 years. The aim of this study was to  
12 compare the trends of general obesity by sex, ethnicity, and age group among adults in the U.S.  
13 from 1999 to 2020 using the RFM and the BMI.

## 1 MATERIAL AND METHODS

### 2 Study design, data source, and participants

3 In this population-based study, we performed an analysis of cross-sectional individual-level data  
4 collected by the National Health and Nutrition Examination Survey (NHANES) through  
5 interviews and physical examination in a subset of a representative sample of the U.S.  
6 population from 1999-2000 through 2017-March 2020. Initial complete dataset included 107,622  
7 participants of all ages. NHANES suspended data collection in March 2020 as a consequence  
8 of the COVID-19 pandemic. Thus, the most current cycle data available are “combined data  
9 collected from 2019 to March 2020 with data from the NHANES 2017-2018 cycle to form a  
10 nationally representative sample of NHANES 2017-March 2020 pre-pandemic data”<sup>30</sup>. Analysis  
11 was restricted to adults 20-79 years of age (n=54,232 potentially eligible) because of three  
12 reasons: 1) the diagnosis of obesity in younger adults is based on BMI-for-age percentiles as  
13 recommended by the Centers for Disease Control and Prevention (CDC)<sup>7</sup>; 2) in NHANES 2007-  
14 2008 and subsequent cycles, the upper age limit was 80 years, whereas in earlier cycles the  
15 age limit was 85 years; and 3) to obtain age-adjusted prevalence estimates using 5-year  
16 intervals according to the strata for age and sex available from the 2000 US Census Bureau  
17 (20-24, 25-29, 30-34, 35-39, 40-44, 45-49, 50-54, 55-59, 60-64, 65-69, 70-74, and 75-79)<sup>31</sup>.  
18 Another criterion for inclusion was that individuals had been interviewed and evaluated by  
19 physical examination. Women who reported to be pregnant or had a positive urine pregnancy  
20 test were excluded from analysis. Observations with missing data on body weight, height, or  
21 waist circumference were also excluded.

22 According to the NHANES physical examination protocol, waist circumference was measured  
23 just above the uppermost lateral border of the right ilium (hip bone). Weight and height were  
24 measured using standard methods<sup>32</sup>. Information on ethnicity was collected through a  
25 questionnaire. The mean unweighted response rate for examined sample across survey cycles

1  
2  
3 1 between 1999-2000 and 2017-March 2020 for individuals 20-79 years was 67.5% (range 50.8-  
4  
5 2 74.5%)<sup>33</sup>.

6  
7  
8 3 Since this study used publicly available de-identified data, approval from an Institutional Review  
9  
10 4 Board was not required, as indicated in the Federal Policy for the Protection of Human Subjects  
11  
12 5 (detailed in 45 CFR part 46)<sup>34</sup>.

### 14 15 6 Obesity diagnosis

16  
17  
18 7 General obesity was diagnosed based on the RFM, a validated surrogate for whole-body fat  
19  
20 8 percentage<sup>23</sup>, and validated cutoffs to predict all-cause mortality: RFM  $\geq 40\%$  for women and  
21  
22 9  $\geq 30\%$  for men<sup>27</sup>. RFM was calculated as follows:  $RFM = 64 - (20 \times \text{height}/\text{waist circumference})$   
23  
24 10  $+ (12 \times \text{sex})$ ; sex equals 0 for men and 1 for women<sup>23</sup>. BMI-defined obesity was diagnosed if  
25  
26 11 BMI was 30 kg/m<sup>2</sup> or higher<sup>7</sup>.

### 27 28 29 12 Statistical Analysis

30  
31  
32 13 Data collected during the survey cycles from 1999-2000 through 2017-2020 were analyzed  
33  
34 14 using sampling weights following the recommended analytic guidelines, to account for  
35  
36 15 oversampling, nonresponse rates, and subsampling for physical examination<sup>35</sup>. The proportion  
37  
38 16 of missing data was 5.2% of all eligible participants. Given this low percentage of missing data,  
39  
40 17 we performed a complete case analysis<sup>36</sup>. Since age distribution of study samples may vary  
41  
42 18 across survey cycles, all prevalence estimates were adjusted for age to make the estimates  
43  
44 19 more comparable throughout the study period<sup>31</sup>. Estimates across the age categories 20-39,  
45  
46 20 40-59, and 60-79 years were also adjusted for age using 5-year intervals according to  
47  
48 21 corresponding 2000 US Census Bureau age categories by sex<sup>31</sup>. The changes in obesity  
49  
50 22 prevalence from 1999-2000 to 2017-March 2020 were assessed using the Wald test. For  
51  
52 23 multiple comparisons of prevalence across ethnic groups and age groups, we applied the  
53  
54 24 Bonferroni correction. Because Asian Americans were not oversampled before NHANES 2011,  
55  
56  
57  
58  
59  
60

1  
2  
3 1 our analyses by ethnicity were restricted to Mexican, European, and African Americans.  
4  
5 2 Prevalence trends were tested for the assumption of linearity using logistic regression models,  
6  
7 3 comparing linear and non-linear regression models using the likelihood-ratio test<sup>37</sup>. For the non-  
8  
9 4 linear models, restricted cubic splines with 3 knots were used at years 2001-2002, 2009-2010,  
10  
11 5 and 2017-2020, based on the quantiles recommended by Harrel<sup>38</sup>. Survey cycles were  
12  
13 6 analyzed as a continuous variable. For visualization purposes, trend lines were smoothed using  
14  
15 7 the Lowes method<sup>39</sup>. Statistical significance was set to an alpha level of 0.05. All statistical  
16  
17 8 analyses were performed using Stata 14 for Windows (StataCorp LP, College Station, TX).  
18  
19 9 Prevalence estimates and standard errors were obtained using the survey 'svy' command with  
20  
21 10 Taylor linearization.  
22  
23  
24

#### 25 Patient and public involvement

26  
27 12 Patients and the public were not involved in this study. This study will be available to the public  
28  
29 13 once it is published in the scientific literature.  
30  
31  
32  
33  
34  
35  
36  
37  
38  
39  
40  
41  
42  
43  
44  
45  
46  
47  
48  
49  
50  
51  
52  
53  
54  
55  
56  
57  
58  
59  
60

## 1 RESULTS

### 2 Clinical characteristics

3 After applying the inclusion and exclusion criteria, the final sample for analysis comprised  
 4 47,667 adults (Supplementary Figure 1). The median age of the study population was 45 years  
 5 (interquartile range: 33 to 58); 50.6% were women; 67.2% were European Americans, 11.2%  
 6 were African Americans, and 8.3% were Mexican Americans (Table 1).

18 **Table 1.** Characteristics of study participants.\*

| 19 <b>Characteristic</b>              | 20 <b>All</b>    | 21 <b>Women</b>   | 22 <b>Men</b>     |
|---------------------------------------|------------------|-------------------|-------------------|
| 23 Median age (IQR), years            | 24 47,667        | 25 23,931 (50.6%) | 26 23,736 (49.4%) |
| 27 Ethnicity, n (%)                   | 28 45 (33-58)    | 29 46 (33-59)     | 30 44 (32-57)     |
| 31 Mexican American                   | 32 8,416 (8.3)   | 33 4,204 (7.7)    | 34 4,212 (9.0)    |
| 35 European American                  | 36 19,691 (67.2) | 37 9,710 (67.0)   | 38 9,981 (67.5)   |
| 39 African American                   | 40 10,673 (11.2) | 41 5,417 (12.0)   | 42 5,256 (10.4)   |
| 43 Other/multi-racial                 | 44 8,887 (13.3)  | 45 4,600 (13.4)   | 46 3,928 (13.1)   |
| 47 Body weight (SD), kg               | 48 82.6 (21.3)   | 49 76.3 (20.5)    | 50 89.0 (20.1)    |
| 51 Mean height (SD), cm               | 52 168.9 (10.0)  | 53 162.1 (6.9)    | 54 175.9 (7.5)    |
| 55 Mean waist circumference (SD), cm  | 56 98.5 (16.5)   | 57 95.9 (16.9)    | 58 101.2 (15.6)   |
| 59 Mean BMI (SD), kg/m <sup>2</sup> † | 60 28.9 (6.8)    | 61 29.0 (7.5)     | 62 28.7 (5.9)     |
| 63 Mean RFM (SD), % ‡                 | 64 34.9 (8.5)    | 65 41.2 (6.0)     | 66 28.4 (5.3)     |

67 \* Sample size represents unweighted data. Estimates represent weighted data.

68 BMI, body mass index; IQR, interquartile range; RFM, relative fat mass; SD, standard deviation.

69 † BMI was calculated as the body weight in kilograms divided by the square of the height in meters.

70 ‡ RFM was calculated as follows:  $64 - (20 \times \text{height/waist circumference}) + (12 \times \text{sex})$ ; sex equals 0 for men and 1 for women; height and waist circumference measured in the same units.

71 The characteristics of the population with missing data are shown in Supplementary Table 1.

### 72 Obesity prevalence and trends

73 Our findings indicate a higher proportion of individuals with obesity when RFM was used instead  
 74 of BMI. The overall age-adjusted prevalence of RFM-defined obesity increased from 42.4%  
 75 (95% confidence interval, 38.3% to 46.4%) in 1999-2000 to 55.4% (53.0% to 57.9%) in 2017-  
 76 March 2020. The corresponding BMI-defined obesity prevalence increased from 30.4% (26.7%  
 77 to 34.0%) to 42.1% (39.4% to 44.8%). We found a linear increase in the overall prevalence of

1 obesity during the study period using either RFM ( $P<0.001$ ;  $P=0.38$  for non-linearity) or BMI  
 2 ( $P<0.001$ ;  $P=0.55$  for non-linearity).

### 3 Obesity prevalence and trends by sex

4 We observed a consistently higher prevalence of RFM-defined obesity in women compared with  
 5 men across years. In contrast, this difference was not consistent for BMI-defined obesity (Figure  
 6 1). In 2017-March 2020, the prevalence of RFM-defined obesity was significantly higher in  
 7 women than in men ( $P<0.001$ ). In contrast, the prevalence of BMI-defined obesity was similar in  
 8 women and men ( $P=0.97$ ). Among women, the prevalence of RFM-defined obesity increased  
 9 from 50.8% (46.2% to 55.3%) in 1999-2000 to 64.7% (62.1% to 67.3%) in 2017-March 2020, a  
 10 linear increase of 13.9 percentage points (9.0% to 18.9%;  $P<0.001$ ). For comparison, the  
 11 prevalence of BMI-defined obesity in women was 42.2% (39.4% to 45.0%) in 2017-March 2020,  
 12 a linear increase of 8.3 percentage points (3.5-13.2%;  $P<0.001$ ) (Table 2).

**Table 2.** Age-adjusted U.S. adult prevalence trends in RFM-defined obesity by sex: 1999-2000 through 2017-March 2020.\*

|                      | RFM-defined obesity<br>n=47,667 | BMI-defined obesity<br>n=47,667 |
|----------------------|---------------------------------|---------------------------------|
| All participants     |                                 |                                 |
| Prevalence, 95% CI   |                                 |                                 |
| 1999-2000            | 42.4 (38.3-46.4)                | 30.4 (26.7-34)                  |
| 2001-2002            | 42.5 (41.1-43.9)                | 30.0 (27.6-32.4)                |
| 2003-2004            | 46.9 (44.7-49.2)                | 32.1 (29.3-34.9)                |
| 2005-2006            | 47.1 (43.7-50.5)                | 34.3 (31.1-37.4)                |
| 2007-2008            | 47.7 (45.0-50.5)                | 33.7 (31.5-36.0)                |
| 2009-2010            | 48.5 (46.1-50.8)                | 35.7 (33.6-37.8)                |
| 2011-2012            | 49.8 (46.6-53.0)                | 35.4 (32.5-38.3)                |
| 2013-2014            | 51.3 (48.7-53.8)                | 37.8 (35.6-40)                  |
| 2015-2016            | 53.7 (49.3-58.0)                | 40.0 (36.4-43.6)                |
| 2017-2020            | 55.4 (53.0-57.9)                | 42.1 (39.4-44.8)                |
| Prevalence change†   | 13.0 (8.5-17.5)                 | 11.8 (7.4-16.1)                 |
| P for non-linearity‡ | 0.38                            | 0.55                            |
| P value for trend‡   | <0.001                          | <0.001                          |
| Women                | n=23,931                        | n=23,931                        |
| Prevalence, 95% CI   |                                 |                                 |
| 1999-2000            | 50.8 (46.2-55.3)                | 33.9 (29.6-38.1)                |
| 2001-2002            | 51.6 (49.2-53.9)                | 32.9 (29.7-36.0)                |
| 2003-2004            | 55.3 (51.2-59.3)                | 33.5 (29.7-37.2)                |
| 2005-2006            | 53.9 (50.4-57.4)                | 34.8 (31.5-38.1)                |
| 2007-2008            | 56.4 (53.5-59.3)                | 35.4 (32.7-38.0)                |
| 2009-2010            | 58.1 (55.3-60.8)                | 36.0 (34.0-37.9)                |
| 2011-2012            | 60.8 (56.8-63.6)                | 36.9 (33.4-40.5)                |
| 2013-2014            | 61.3 (57.9-64.7)                | 40.0 (36.8-43.2)                |

|     |                      |                  |                  |
|-----|----------------------|------------------|------------------|
|     | 2015-2016            | 64.4 (60.2-68.6) | 41.7 (38.1-45.3) |
|     | 2017-2020            | 64.7 (62.1-67.3) | 42.2 (39.4-45.0) |
|     | Prevalence change†   | 13.9 (9.0-18.9)  | 8.3 (3.5-13.2)   |
|     | P for non-linearity§ | 0.10             | 0.39             |
|     | P value for trend§   | <0.001           | <0.001           |
| Men |                      | n=23,736         | n=23,736         |
|     | Prevalence, 95% CI   |                  |                  |
|     | 1999-2000            | 33.9 (29.9-37.8) | 27.0 (23.5-30.4) |
|     | 2001-2002            | 33.1 (30.6-35.5) | 27.0 (24.8-29.2) |
|     | 2003-2004            | 38.4 (35.9-40.8) | 30.7 (27.6-33.9) |
|     | 2005-2006            | 40.2 (35.9-44.4) | 33.5 (29.3-37.8) |
|     | 2007-2008            | 38.8 (35.6-42.0) | 32.1 (29.3-34.8) |
|     | 2009-2010            | 38.7 (35.2-42.2) | 35.3 (31.4-39.2) |
|     | 2011-2012            | 39.2 (35.9-42.5) | 33.8 (30.7-36.9) |
|     | 2013-2014            | 41.2 (38.7-43.7) | 35.6 (33.2-38.1) |
|     | 2015-2016            | 42.7 (37.7-47.7) | 38.2 (33.3-43.2) |
|     | 2017-2020            | 45.8 (42.0-49.7) | 42.0 (37.8-46.3) |
|     | Prevalence change†   | 12.0 (6.6-17.3)  | 15.1 (9.8-20.4)  |
|     | P for non-linearity§ | 0.82             | 0.84             |
|     | P value for trend§   | <0.001           | <0.001           |

\* Prevalence estimates represent weighted data. The relative fat mass (RFM) was calculated as follows:  $RFM = 64 - (20 \times \text{height/waist circumference}) + (12 \times \text{sex})$ ; sex equals 0 for men and 1 for women. Obesity was diagnosed if RFM was 40% or higher for women and RFM was 30% or higher for men. CI denotes confidence interval.

† Absolute difference (prevalence in 2017-2020 minus the prevalence in 1999-2000).

‡ Adjusted for age, sex, and ethnicity.

§ Adjusted for age and ethnicity.

Among men, the prevalence of RFM-defined obesity increased from 33.9% (29.9% to 37.8%) in 1999-2000 to 45.8% (42.0% to 49.7%) in 2017-March 2020, a linear increase of 12.0 percentage points (6.6% to 17.3%;  $P < 0.001$ ). The prevalence of BMI-defined obesity in men was 42.0% (37.8% to 46.3%) in 2017-March 2020, a linear increase of 15.1 percentage points (9.8% to 20.4%).

#### Obesity prevalence and trends by ethnicity

The highest prevalence of RFM-defined obesity across years was observed among Mexican Americans. In contrast, the highest prevalence of BMI-defined obesity was observed among African American women but not men (Figure 2). In 2017-March 2020, the prevalence of RFM-defined obesity was significantly higher in Mexican Americans compared with African Americans (Bonferroni corrected  $P < 0.001$ ) or European Americans ( $P < 0.001$ ). BMI-defined obesity

1 prevalence was similar in Mexican and African Americans ( $P=1.00$ ) and both groups had a  
 2 higher prevalence than European Americans ( $P=0.003$  and  $P=0.001$ , respectively).  
 3 The largest increase in the prevalence of RFM-defined obesity from 1999-2000 to 2017-March  
 4 2020 occurred in Mexican American men, with a linear increase of 18.3 percentage points  
 5 (12.0% to 24.5%;  $P<0.001$ ) (Table 3 and Figure 2). The highest increase in the prevalence of  
 6 BMI-defined obesity also occurred in Mexican American men, with a linear increase of 21.2  
 7 percentage points (15.3% to 27.1%;  $P<0.001$ ) (Table 3 and Figure 2).

**Table 3.** Age-adjusted U.S. adult prevalence trends in RFM-defined obesity by ethnicity: 1999-2000 through 2017-March 2020.\*

|                      | RFM-defined obesity |                   |                  | BMI-defined obesity |                   |                  |
|----------------------|---------------------|-------------------|------------------|---------------------|-------------------|------------------|
|                      | Mexican American    | European American | African American | Mexican American    | European American | African American |
| All participants     | n=8,416             | n=19,691          | n=10,673         | n=8,416             | n=19,691          | n=10,673         |
| Prevalence, 95% CI   |                     |                   |                  |                     |                   |                  |
| 1999-2000            | 53.1 (48.5-57.7)    | 39.4 (34.2-44.6)  | 48.3 (45.0-51.7) | 34.7 (28.9-40.6)    | 28.3 (23.9-32.7)  | 39.8 (35.7-43.8) |
| 2001-2002            | 52.1 (47.1-57.1)    | 41.0 (38.9-43.1)  | 46.0 (42.9-49.0) | 30.7 (26.7-34.7)    | 29.8 (27.0-32.6)  | 38.3 (34.4-42.3) |
| 2003-2004            | 60.1 (55.2-65.0)    | 44.8 (41.0-48.6)  | 52.7 (49.4-56.0) | 36.9 (32.2-41.6)    | 30.6 (27.7-33.4)  | 45.1 (39.7-50.5) |
| 2005-2006            | 55.4 (51.8-58.9)    | 44.9 (40.7-49.2)  | 51.5 (47.9-55.1) | 33.8 (31.2-36.4)    | 33.1 (29.2-36.9)  | 45.9 (42.3-49.5) |
| 2007-2008            | 62.2 (56.2-68.2)    | 45.7 (41.5-49.9)  | 52.5 (49.1-56.0) | 39.9 (33.8-46.1)    | 32.4 (28.7-36.0)  | 43.7 (39.2-48.1) |
| 2009-2010            | 61.5 (59.4-63.6)    | 46.4 (43.0-49.8)  | 56.8 (51.8-61.8) | 40.5 (36.7-44.4)    | 34.2 (31.1-37.2)  | 49.4 (44.2-54.5) |
| 2011-2012            | 63.6 (58.6-68.6)    | 46.8 (42.8-50.9)  | 57.4 (54.8-60.0) | 46.1 (41.3-50.8)    | 33.0 (29.4-36.5)  | 48.4 (44.6-52.3) |
| 2013-2014            | 65.0 (61.2-68.9)    | 49.4 (46.6-52.3)  | 55.0 (50.0-59.9) | 46.1 (41.0-51.2)    | 36.6 (33.6-39.5)  | 47.9 (43.7-52.0) |
| 2015-2016            | 70.3 (67.0-73.5)    | 51.2 (46.9-55.4)  | 56.6 (52.0-61.2) | 48.7 (44.3-53.1)    | 38.5 (34.5-42.5)  | 48.7 (43.8-53.5) |
| 2017-2020            | 68.8 (64.5-73.1)    | 54.1 (50.8-57.4)  | 57.1 (54.4-59.8) | 50.2 (46.8-53.5)    | 41.7 (37.7-45.6)  | 49.9 (47.2-52.6) |
| Prevalence change†   | 15.7 (9.6-21.7)     | 14.7 (8.8-20.5)   | 8.7 (4.6-12.9)   | 15.4 (9.0-21.9)     | 13.4 (7.7-19)     | 10.2 (5.5-14.8)  |
| P for non-linearity‡ | 0.58                | 0.97              | 0.25             | 0.52                | 0.10              | 0.35             |
| P value for trend‡   | <0.001              | <0.001            | <0.001           | <0.001              | <0.001            | <0.001           |
| Women                | n=4,204             | n=9,710           | n=5,417          | n=4,204             | n=9,710           | n=5,417          |
| Prevalence, 95% CI   |                     |                   |                  |                     |                   |                  |
| 1999-2000            | 62.8 (55.1-70.5)    | 46.2 (40.2-52.1)  | 64.2 (59.6-68.8) | 39.8 (31.1-48.5)    | 30.3 (25.2-35.3)  | 49.2 (42.5-56.0) |
| 2001-2002            | 66.4 (58.6-74.3)    | 47.8 (44.2-51.4)  | 64.2 (59.0-69.4) | 37.0 (30.2-43.8)    | 31.1 (27.6-34.7)  | 48.7 (42.8-54.7) |



|                      |                  |                  |                  |                  |                  |                  |
|----------------------|------------------|------------------|------------------|------------------|------------------|------------------|
| 2003-2004            | 75.0 (68.3-81.6) | 50.6 (43.9-57.2) | 70.7 (65.5-75.8) | 42.7 (36.0-49.3) | 30.3 (25.7-34.8) | 53.9 (46.3-61.5) |
| 2005-2006            | 72.0 (66.4-77.5) | 49.9 (45.6-54.2) | 66.2 (60.9-71.5) | 41.3 (34.8-47.7) | 32.8 (28.3-37.3) | 52.7 (48.5-56.9) |
| 2007-2008            | 74.8 (71.2-78.4) | 52.3 (47.5-57.2) | 67.9 (63.2-72.6) | 44.7 (38.8-50.6) | 32.8 (28.7-36.9) | 49.2 (45.2-53.3) |
| 2009-2010            | 77.8 (74.8-80.9) | 53.4 (49.5-57.2) | 74.6 (68.6-80.7) | 45.7 (42.0-49.3) | 32.1 (29.0-35.3) | 58.5 (52.0-64.9) |
| 2011-2012            | 74.6 (66.2-83.0) | 56.3 (51.4-61.3) | 74.9 (72.1-77.8) | 49.0 (40.4-57.5) | 33.3 (28.0-38.7) | 57.9 (53.5-62.3) |
| 2013-2014            | 81.2 (74.7-87.6) | 57.3 (53.4-61.2) | 72.5 (68.8-76.2) | 51.7 (45.2-58.3) | 37.6 (33.7-41.6) | 56.7 (53.1-60.3) |
| 2015-2016            | 84.6 (79.7-89.5) | 60.0 (56.2-63.8) | 72.3 (68.3-76.4) | 52.2 (48.4-56.1) | 38.5 (34.0-43.0) | 57.1 (52.6-61.5) |
| 2017-2020            | 76.9 (70.8-83.1) | 62.3 (59.0-65.7) | 72.4 (68.6-76.2) | 49.6 (43.1-56.0) | 40.3 (36.4-44.2) | 57.3 (53.7-60.9) |
| Prevalence change†   | 14.1 (4.7-23.6)  | 16.2 (9.7-22.7)  | 8.3 (2.5-14.0)   | 9.8 (-0.6-20.1)  | 10.0 (3.9-16.1)  | 8.1 (0.8-15.4)   |
| P for non-linearity‡ | 0.026            | 0.77             | 0.34             | 0.76             | 0.12             | 0.71             |
| P value for trend§   |                  | <0.001           | <0.001           | <0.001           | <0.001           | <0.001           |
| Men                  | n=4,212          | n=9,981          | n=5,256          | n=4,212          | n=9,981          | n=5,256          |
| Prevalence, 95% CI   |                  |                  |                  |                  |                  |                  |
| 1999-2000            | 42.9 (39.4-46.5) | 33.2 (28.6-37.7) | 27.5 (23.1-31.9) | 29.1 (24.6-33.6) | 26.8 (22.9-30.6) | 26.8 (23.0-30.6) |
| 2001-2002            | 40.6 (34.7-46.4) | 34.1 (30.9-37.4) | 25.8 (21.4-30.1) | 25.9 (21.9-29.9) | 28.3 (25.3-31.4) | 26.5 (22.8-30.1) |
| 2003-2004            | 47.1 (39.3-54.8) | 38.9 (35.5-42.4) | 31.2 (27.2-35.2) | 31.7 (25.0-38.3) | 30.9 (27.0-34.7) | 34.2 (27.7-40.7) |
| 2005-2006            | 40.8 (34.1-47.4) | 40.0 (35.1-44.9) | 34.1 (28.3-39.9) | 27.4 (22.7-32.1) | 33.3 (28.7-37.9) | 37.2 (31.2-43.2) |
| 2007-2008            | 50.9 (43.3-58.4) | 38.8 (34.7-42.9) | 33.8 (28.8-38.9) | 35.1 (28.0-42.1) | 32.0 (27.9-36.0) | 36.9 (31.0-42.7) |
| 2009-2010            | 47.8 (44.6-51.0) | 39.4 (34.6-44.3) | 35.4 (31.4-39.5) | 36.3 (30.9-41.6) | 36.1 (30.8-41.3) | 38.6 (33.1-44.0) |
| 2011-2012            | 52.5 (45.6-59.4) | 37.6 (34.3-40.9) | 36.4 (32.3-40.5) | 42.7 (36.0-49.5) | 32.5 (29.7-35.3) | 37.5 (32.8-42.2) |
| 2013-2014            | 52.4 (48.6-56.3) | 41.7 (38.1-45.3) | 35.2 (28.6-41.8) | 43.6 (38.2-49.1) | 35.6 (31.6-39.5) | 37.9 (32.5-43.4) |
| 2015-2016            | 55.9 (50.9-60.8) | 42.3 (36.5-48.1) | 38.1 (31.9-44.2) | 45.3 (38.5-52.1) | 38.4 (32.5-44.3) | 38.9 (33.5-44.2) |
| 2017-2020            | 61.2 (55.8-66.6) | 45.8 (40.3-51.2) | 39.1 (35.4-42.8) | 50.3 (46.1-54.5) | 43.1 (36.9-49.2) | 41.2 (36.7-45.7) |
| Prevalence change†   | 18.3 (12.0-24.5) | 12.6 (5.7-19.5)  | 11.6 (6.1-17.1)  | 21.2 (15.3-27.1) | 16.3 (9.3-23.3)  | 14.4 (8.7-20.1)  |
| P for non-linearity‡ | 0.21             | 0.80             | 0.50             | 0.24             | 0.45             | 0.08             |
| P value for trend§   | <0.001           | <0.001           | <0.001           | <0.001           | <0.001           | <0.001           |

\* Prevalence estimates represent weighted data. The relative fat mass (RFM) was calculated as follows:  $RFM = 64 - (20 \times \text{height/waist circumference}) + (12 \times \text{sex})$ ; sex equals 0 for men and 1 for women. Obesity was diagnosed if RFM was 40% or higher for women and RFM was 30% or higher for men. CI denotes confidence interval.

† Absolute difference (prevalence in 2017-2020 minus the prevalence in 1999-2000).

‡ Adjusted for age and sex.

§ Adjusted for age.

## Obesity prevalence and trends by age group

In women and men, the highest prevalence of RFM-defined obesity across years was observed in older adults (60-79 years) (Table 4 and Figure 3).

**Table 4.** Age-adjusted U.S. adult prevalence trends in RFM-defined obesity by age group: 1999-2000 through 2017-March 2020.\*

|                      | RFM-defined obesity |                  |                  | BMI-defined obesity |                  |                  |
|----------------------|---------------------|------------------|------------------|---------------------|------------------|------------------|
|                      | 20-39 years old     | 40-59 years old  | 60-79 years old  | 20-39 years old     | 40-59 years old  | 60-79 years old  |
| All participants     | n=16,747            | n=16,912         | n=14,008         | n=16,747            | n=16,912         | n=14,008         |
| Prevalence, 95% CI   |                     |                  |                  |                     |                  |                  |
| 1999-2000            | 29.0 (24.5-33.6)    | 46.9 (40.5-53.4) | 61.8 (58.1-65.6) | 25.4 (21.5-29.3)    | 33.2 (26.9-39.4) | 35.4 (31.3-39.5) |
| 2001-2002            | 30.2 (27.2-33.1)    | 45.0 (42.2-47.8) | 63.8 (61.3-66.3) | 25.3 (22.4-28.1)    | 33.2 (29.9-36.4) | 33.7 (30.7-36.8) |
| 2003-2004            | 34.2 (31.2-37.1)    | 51.2 (47.8-54.6) | 65.8 (62.5-69.0) | 28.1 (24.6-31.7)    | 35.9 (32.1-39.7) | 33.0 (29.4-36.5) |
| 2005-2006            | 32.6 (28.7-36.5)    | 53.2 (47.9-58.5) | 66.0 (62.2-69.8) | 28.5 (24.1-32.9)    | 40.1 (35.6-44.6) | 34.9 (31.5-38.3) |
| 2007-2008            | 35.5 (31.1-39.9)    | 51.6 (48.5-54.7) | 66.1 (62.4-69.8) | 30.2 (26.2-34.3)    | 35.7 (32.4-39.1) | 37.4 (33.8-40.9) |
| 2009-2010            | 37.2 (32.8-41.6)    | 50.5 (47.7-53.4) | 68.5 (65.2-71.8) | 32.5 (28.7-36.3)    | 36.0 (33.9-38.2) | 41.8 (38.0-45.7) |
| 2011-2012            | 37.7 (33.1-42.3)    | 53.6 (49.9-57.3) | 68.0 (62.9-73.1) | 30.4 (26.2-34.5)    | 39.3 (36.1-42.5) | 38.3 (33.8-42.9) |
| 2013-2014            | 40.0 (36.2-43.9)    | 54.5 (50.3-58.7) | 68.8 (64.6-73.0) | 34.4 (31.3-37.5)    | 40.6 (36.2-45.1) | 39.3 (35.2-43.5) |
| 2015-2016            | 43.0 (39.0-47.0)    | 57.1 (50.6-63.6) | 69.8 (64.7-74.9) | 36.0 (32.2-39.8)    | 42.8 (37.5-48.2) | 42.8 (37.5-48.2) |
| 2017-2020            | 44.6 (40.5-48.6)    | 59.4 (56.2-62.7) | 70.6 (67.2-74.0) | 39.8 (35.6-44.0)    | 44.3 (41.2-47.4) | 42.7 (39.1-46.3) |
| Prevalence change†   | 15.5 (9.7-21.3)     | 12.5 (5.6-19.4)  | 8.8 (3.9-13.6)   | 14.5 (8.9-20.0)     | 11.2 (4.5-17.8)  | 7.3 (2.0-12.5)   |
| P for non-linearity‡ | 0.65                | 0.94             | 0.25             | 0.48                | 0.21             | 0.46             |
| P value for trend‡   | <0.001              | <0.001           | <0.001           | <0.001              | <0.001           | <0.001           |
| Women                | n=8,295             | n=8,684          | n=6,952          | n=8,295             | n=8,684          | n=6,952          |
| Prevalence, 95% CI   |                     |                  |                  |                     |                  |                  |
| 1999-2000            | 36.9 (30.9-42.9)    | 56.2 (48.9-63.5) | 67.7 (63.3-72.2) | 28.7 (23.6-33.7)    | 37.4 (30.2-44.5) | 37.4 (31.6-43.2) |
| 2001-2002            | 39.9 (35.3-44.5)    | 52.9 (48.1-57.6) | 72.0 (69.3-74.7) | 28.9 (24.1-33.6)    | 35.0 (30.2-39.8) | 36.6 (32.0-41.2) |
| 2003-2004            | 42.0 (35.8-48.2)    | 59.7 (54.9-64.5) | 73.0 (68.3-77.7) | 29.0 (23.8-34.1)    | 38.1 (32.3-43.9) | 33.6 (28.5-38.7) |
| 2005-2006            | 40.3 (35.3-45.4)    | 58.7 (53.5-63.8) | 71.3 (66.4-76.2) | 29.2 (24.1-34.3)    | 40.7 (35.9-45.6) | 34.8 (28.4-41.2) |

|                      |                  |                  |                  |                  |                  |                  |
|----------------------|------------------|------------------|------------------|------------------|------------------|------------------|
| 2007-2008            | 46.1 (40.4-51.7) | 60.0 (56.2-63.8) | 69.8 (64.5-75.1) | 33.0 (27.3-38.6) | 37.6 (32.6-42.5) | 36.0 (30.0-41.9) |
| 2009-2010            | 46.4 (40.6-52.2) | 59.3 (55.5-63.1) | 78.5 (75.8-81.3) | 31.8 (28.2-35.4) | 35.5 (31.7-39.3) | 45.1 (40.7-49.5) |
| 2011-2012            | 47.6 (42.1-53.1) | 64.6 (60.1-69.0) | 76.7 (69.8-83.5) | 31.9 (28.0-35.9) | 39.4 (35.1-43.6) | 42.1 (34.4-49.7) |
| 2013-2014            | 50.8 (46.6-55.1) | 63.3 (58.1-68.5) | 78.0 (74.6-81.4) | 36.6 (33.9-39.3) | 43.6 (38.2-48.9) | 40.2 (34.1-46.2) |
| 2015-2016            | 53.3 (48.9-57.8) | 69.1 (62.7-75.5) | 77.1 (70.6-83.6) | 37.1 (33.5-40.7) | 44.8 (38.4-51.1) | 45.0 (37.3-52.8) |
| 2017-2020            | 53.3 (48.5-58.0) | 67.9 (63.6-72.3) | 81.0 (76.4-85.6) | 39.9 (35.3-44.4) | 42.8 (38.9-46.7) | 45.4 (40.9-49.8) |
| Prevalence change†   | 16.4 (9.1-23.7)  | 11.7 (3.6-19.9)  | 13.3 (7.1-19.5)  | 11.2 (4.7-17.7)  | 5.5 (-2.3-13.2)  | 8.0 (1.0-15.0)   |
| P for non-linearity§ | 0.16             | 0.39             | 0.99             | 0.44             | 0.42             | 0.97             |
| P value for trend§   | <0.001           | <0.001           | <0.001           | <0.001           | <0.001           | <0.001           |
| Men                  | n=8,452          | n=8,228          | n=7,056          | n=8,452          | n=8,228          | n=7,056          |
| Prevalence, 95% CI   |                  |                  |                  |                  |                  |                  |
| 1999-2000            | 22.4 (18.0-26.8) | 36.8 (30.4-43.2) | 54.7 (49.9-59.5) | 22.7 (18.3-27.0) | 28.8 (22.8-34.8) | 33.2 (28.2-38.1) |
| 2001-2002            | 20.8 (17.4-24.1) | 37.1 (33.5-40.7) | 53.5 (49.8-57.1) | 21.7 (18.5-24.9) | 31.2 (28.0-34.5) | 30.4 (26.0-34.8) |
| 2003-2004            | 26.9 (23.3-30.4) | 42.3 (36.7-47.9) | 57.2 (52.5-62.0) | 27.4 (22.5-32.3) | 33.6 (28.4-38.9) | 32.3 (27.4-37.2) |
| 2005-2006            | 25.4 (20.1-30.7) | 47.4 (40.5-54.2) | 59.8 (54.8-64.7) | 27.6 (22.0-33.1) | 39.5 (33.1-45.9) | 34.7 (29.9-39.5) |
| 2007-2008            | 25.4 (21.2-29.5) | 42.8 (37.8-47.8) | 61.8 (57.7-65.9) | 27.6 (23.8-31.4) | 33.7 (28.8-38.5) | 39.2 (34.8-43.5) |
| 2009-2010            | 28.5 (23.6-33.3) | 41.6 (37.7-45.5) | 56.9 (51.1-62.7) | 33.2 (27.2-39.2) | 36.6 (33.0-40.2) | 37.5 (32.3-42.8) |
| 2011-2012            | 28.4 (23.9-33.0) | 42.3 (38.0-46.6) | 58.1 (52.1-64.2) | 28.9 (23.5-34.2) | 39.1 (35.6-42.5) | 34.2 (29.2-39.2) |
| 2013-2014            | 30.0 (25.5-34.5) | 45.5 (40.3-50.7) | 58.6 (51.6-65.5) | 32.5 (28.1-36.8) | 37.7 (32.2-43.3) | 38.6 (30.7-46.4) |
| 2015-2016            | 33.1 (28.3-38.0) | 44.5 (36.5-52.6) | 61.4 (55.4-67.5) | 35.0 (29.0-41.0) | 40.8 (34.6-47.1) | 40.2 (34.9-45.5) |
| 2017-2020            | 35.9 (30.2-41.5) | 50.8 (46.2-55.4) | 58.8 (54.3-63.3) | 39.5 (33.1-46.0) | 45.8 (41.1-50.6) | 39.7 (34.0-45.4) |
| Prevalence change†   | 13.4 (6.5-20.4)  | 14.0 (6.4-21.6)  | 4.1 (-2.3-10.5)  | 16.8 (9.3-24.4)  | 17.0 (9.7-24.4)  | 6.5 (-0.7-13.8)  |
| P for non-linearity§ | 0.47             | 0.42             | 0.16             | 0.97             | 0.41             | 0.24             |
| P value for trend§   | <0.001           | <0.001           | <0.001           | <0.001           | <0.001           | <0.001           |

\* Prevalence estimates represent weighted data. The relative fat mass (RFM) was calculated as follows:  $RFM = 64 - (20 \times \text{height/waist circumference}) + (12 \times \text{sex})$ ; sex equals 0 for men and 1 for women. Obesity was diagnosed if RFM was 40% or higher for women and RFM was 30% or higher for men. CI denotes confidence interval.

† Absolute difference (prevalence in 2017-2020 minus the prevalence in 1999-2000).

‡ Adjusted for sex and ethnicity.

§ Adjusted for ethnicity.

1  
2  
3 1 In contrast, no differences were observed in the prevalence of obesity between individuals 60-  
4  
5 2 79 years and 40-59 years when using BMI for the diagnosis of obesity (Figure 3). In 2017-March  
6  
7 3 2020, the prevalence of RFM-defined obesity was significantly higher in individuals 60-79 years  
8  
9 4 compared with those 40-59 years (Bonferroni corrected  $P < 0.001$ ) or 20-39 years ( $P < 0.001$ ). We  
10  
11 5 found no statistically significant differences in the prevalence of BMI-defined obesity across age  
12  
13 6 groups ( $P > 0.17$  for all comparisons).  
14  
15  
16  
17  
18  
19  
20  
21  
22  
23  
24  
25  
26  
27  
28  
29  
30  
31  
32  
33  
34  
35  
36  
37  
38  
39  
40  
41  
42  
43  
44  
45  
46  
47  
48  
49  
50  
51  
52  
53  
54  
55  
56  
57  
58  
59  
60

For peer review only

## 1 DISCUSSION

2 Our study shows that, compared with BMI, the use of a surrogate for whole-body fat percentage  
3 revealed a much higher prevalence of general obesity among adults in the U.S., particularly  
4 among women, affecting nearly two-thirds of all women and nearly half of all men in 2017-2020,  
5 with an overall prevalence of 55.4%. This is an additional 22.5% of women and 3.8% of men 20-  
6 79 years being defined as obese compared with a BMI-based definition with the current criteria.

7 The use of RFM also revealed that the highest prevalence of general obesity over the study  
8 period from 1999 to 2020 occurred among Mexican Americans and not among African  
9 Americans, as was observed when BMI was used to diagnose obesity. Likewise, the use of  
10 RFM showed that the highest prevalence of general obesity over this study period occurred  
11 among older adults (60-79 years) and not among adults 40-59 years, as was observed when  
12 BMI was used.

13 Overall, women had a markedly higher prevalence of RFM-defined obesity across years than  
14 men, a difference that was less evident when using BMI. Previous studies have shown no  
15 differences in the prevalence of BMI-defined obesity between women and men<sup>34 40</sup>. In the  
16 present study, the difference in the prevalence of RFM-defined obesity for 2017-2020 between  
17 women and men was nearly 20 percentage points.

18 The highest prevalence of RFM-defined obesity was observed in Mexican Americans, and the  
19 increase was linear over the study period, albeit this linear increase was largely driven by a  
20 steady increase among men. Among Mexican American women, a decrease was observed  
21 since 2015. A previous study reported that, between 2003 and 2006, the prevalence of BMI-  
22 defined obesity was higher among African Americans compared with Mexican Americans, but  
23 between 2015 and 2018, Mexican American men had a higher prevalence than African  
24 American men<sup>29</sup>. In contrast, RFM revealed a consistently higher prevalence of general obesity

1 among Mexican Americans over the observed time, in both women and men. Socio-economic  
2 characteristics are probably the main determinants of differences in the prevalence of general  
3 obesity between ethnic groups <sup>41</sup>.

4 Further research is needed to better understand the clinical implications of our study findings: 1)  
5 the much higher prevalence of general obesity among women when RFM is used as opposed to  
6 BMI; 2) the higher burden of general obesity on Mexican Americans compared with African and  
7 European Americans; and 3) the higher prevalence of general obesity in older individuals. Since  
8 RFM is based on waist circumference, and waist circumference is a surrogate for intra-  
9 abdominal fat <sup>42 43</sup>, RFM could be a surrogate for both general obesity and abdominal obesity.  
10 Although RFM has been shown to predict trunk fat percentage, the prediction error is greater for  
11 trunk fat percentage than for whole-body fat percentage <sup>23</sup>.

12 The higher prevalence of RFM-defined obesity in older individuals found in our study is  
13 consistent with the higher body fat percentage observed in older individuals <sup>12 23 44-48</sup>. Whether  
14 the increased whole-body fat percentage in older individuals confers a higher risk on mortality  
15 requires further investigation. For instance, age *per se* is a strong risk factor for mortality, and  
16 the relationship between obesity and mortality could be mediated by age <sup>49</sup>. Conversely, the  
17 high body fat percentage in older individuals could explain the association of BMI-defined  
18 obesity with diabetes and cardiovascular disease in older individuals <sup>50-53</sup>. The increase in body  
19 adiposity with aging coincides with the high prevalence of many cardiometabolic alterations  
20 occurring more often in older individuals, such as glucose intolerance, insulin resistance,  
21 dyslipidemia, and hypertension <sup>49</sup>. BMI did not detect a higher prevalence of general obesity in  
22 individuals aged 60 years and older compared with younger adults, unlike when RFM was used.  
23 These findings further support that notion that BMI is a poor predictor of morbidity and mortality  
24 in older individuals <sup>48 54</sup>.

1  
2  
3 1 Our study has strengths. First, we used RFM, a previously validated surrogate for whole-body  
4  
5 2 fat percentage in adults in the U.S.<sup>23</sup>, which has a high diagnostic accuracy (91%) for DXA-  
6  
7 3 defined obesity<sup>27</sup> and has been shown to result in lower total misclassification of DXA-defined  
8  
9 4 high body adiposity compared with BMI among women (RFM: 12.7%; BMI: 56.5%) and men  
10  
11 5 (RFM: 9.4% BMI: 13.0%)<sup>23</sup>. Second, to define general obesity, we used previously validated  
12  
13 6 RFM cutoffs to predict all-cause mortality in a large U.S. adult population<sup>27</sup>. Previously  
14  
15 7 proposed cutoffs for fat-defined obesity have been based on arbitrary values<sup>55 56</sup> or on  
16  
17 8 corresponding BMI cutoffs<sup>12</sup>. Third, RFM requires only measured waist circumference and  
18  
19 9 height, which allowed us to estimate the prevalence of general obesity in a large adult  
20  
21 10 population of the U.S. (n=44,754) with a wide age range, over a period of nearly 22 years.  
22  
23 11 Fourth, NHANES have used a consistent methodology across survey cycles to measure  
24  
25 12 anthropometrics, reducing the risk of measurement error to influence our results.

26  
27  
28  
29 13 Our study also has limitations. First, our analysis was performed using data from a  
30  
31 14 representative sample of the non-institutionalized U.S. population only. Second, our estimates  
32  
33 15 of prevalence trends could have been affected by some variability in sampling across NHANES  
34  
35 16 survey cycles<sup>35</sup>. Third, we did not analyze the prevalence trends for Asian Americans during the  
36  
37 17 period studied because NHANES began oversampling Asian Americans only from 2011-2012  
38  
39 18 onwards and the RFM cutoffs used to diagnose general obesity have not been validated among  
40  
41 19 Asian populations.

42  
43  
44 20 From a public health perspective, we argue that due to the underdiagnosis of obesity when  
45  
46 21 using BMI, the most affected populations are not receiving adequate medical care that they  
47  
48 22 require. Aspects that will need further research are the implications of some possible  
49  
50 23 overdiagnosis of obesity<sup>57</sup> and the stigma that would be associated with it<sup>58</sup>.

51  
52  
53 24 In conclusion, the use of RFM, a surrogate for whole-body fat percentage, revealed a much  
54  
55 25 higher prevalence of general obesity in the U.S. from 1999 to 2020, particularly among women,

1  
2  
3 1 than that estimated by the BMI. RFM, but not BMI, also revealed a disproportionate higher  
4  
5 2 prevalence of general obesity in adults aged 60 years and older and Mexican Americans. Using  
6  
7 3 BMI as the lone measure to define obesity may lead to significant misclassification of large  
8  
9 4 obese subpopulations as non-obese, particularly among women. Our findings may have  
10  
11 5 implications for the use of resources in public health to tackle obesity-related health problems in  
12  
13 6 the most affected populations.  
14  
15  
16  
17  
18  
19  
20  
21  
22  
23  
24  
25  
26  
27  
28  
29  
30  
31  
32  
33  
34  
35  
36  
37  
38  
39  
40  
41  
42  
43  
44  
45  
46  
47  
48  
49  
50  
51  
52  
53  
54  
55  
56  
57  
58  
59  
60

For peer review only



## 1           2           3           4           5           6           7           8           9           10           11           12           13           14           15           16           17           18           19           20           21           22           23           24           25           26           27           28           29           30           31           32           33           34           35           36           37           38           39           40           41           42           43           44           45           46           47           48           49           50           51           52           53           54           55           56           57           58           59           60

### 1   **ETHICS APPROVAL**

2   Since this study used publicly available de-identified data, approval from an Institutional Review  
3   Board was not required, as indicated in the Federal Policy for the Protection of Human Subjects  
4   (detailed in 45 CFR part 46) 35.

### 6   **DATA AVAILABILITY STATEMENT**

7   All data utilized for analysis in this study are fully available at:  
8   <https://wwwn.cdc.gov/nchs/nhanes/>

### 10   **ACKNOWLEDGMENTS**

11   We thank the Centers for Disease Control and Prevention (CDC) and the National Center for  
12   Health Statistics (NCHS) for providing access to the NHANES datasets. We also thank all  
13   subjects who participated in the surveys from 1999 through 2020.

## 1 **AUTHOR CONTRIBUTIONS**

2 OOW was responsible for the conception and design of the study. OOW contributed to the  
3 statistical analysis. OOW and TS contributed to the interpretation of data and critical revision of  
4 the manuscript. OOW and TS drafted the final version of the manuscript and agreed to the  
5 submitted version of the manuscript. OOW is the manuscript's guarantor. OOW accepts full  
6 responsibility for the work and the conduct of the study, had access to the data, and controlled  
7 the decision to submit for publication.

## 8 **FUNDING**

9 This research received no specific grant from any funding agency in the public, commercial or  
10 not-for-profit sectors.

## 11 **COMPETING INTERESTS**

12 The authors declare no conflict of interest.

## 13 **TRANSPARENCY STATEMENT**

14 OW (the manuscript's guarantor) affirms that the manuscript is an honest, accurate, and  
15 transparent account of the study being reported; that no important aspects of the study have  
16 been omitted; and that any discrepancies from the study as originally planned have been  
17 explained.

## 18 **PATIENT AND PUBLIC INVOLVEMENT**

19 Patients and the public were not involved in this study. This study will be available to the public  
20 once it is published in the scientific literature.

1  
2  
3 1 REFERENCES  
4  
5

- 6 2 1. Flegal KM, Carroll MD, Ogden CL, et al. Prevalence and trends in obesity among US adults, 1999-2000. *JAMA* 2002;288(14):1723-7. doi: 10.1001/jama.288.14.1723
- 7 3 2. Flegal KM, Kruszon-Moran D, Carroll MD, et al. Trends in Obesity Among Adults in the United States, 2005 to 2014. *JAMA* 2016;315(21):2284-91. doi: 10.1001/jama.2016.6458
- 8 4 3. Hales CM, Carroll MD, Fryar CD, et al. Prevalence of obesity and severe obesity among adults: United States, 2017-2018. *NCHS Data Brief* 2020(360):1-8.
- 9 5 4. Stierman B, Afful J, Carroll MD, et al. National Health and Nutrition Examination Survey 2017–March 2020 prepandemic data files - Development of files and prevalence estimates for selected health outcomes. *National Health Statistics Reports* 2021(158):1-20.
- 10 6 5. Rothman KJ. BMI-related errors in the measurement of obesity. *Int J Obes (Lond)* 2008;32 Suppl 3:S56-9. doi: 10.1038/ijo.2008.87
- 11 7 6. WHO. Physical status: the use and interpretation of anthropometry. WHO Technical Report Series. Geneva, 1995.
- 12 8 7. CDC. Defining adult overweight & obesity. Available at: <https://www.cdc.gov/obesity/basics/adult-defining.html>. Accessed April 18, 2022.
- 13 9 8. Garn SM, Leonard WR, Hawthorne VM. Three limitations of the body mass index. *Am J Clin Nutr* 1986;44(6):996-7. doi: 10.1093/ajcn/44.6.996
- 14 10 9. Gallagher D, Visser M, Sepulveda D, et al. How useful is body mass index for comparison of body fatness across age, sex, and ethnic groups? *Am J Epidemiol* 1996;143(3):228-39.
- 15 11 10. Romero-Corral A, Montori VM, Somers VK, et al. Association of bodyweight with total mortality and with cardiovascular events in coronary artery disease: a systematic review of cohort studies. *Lancet* 2006;368(9536):666-78. doi: 10.1016/S0140-6736(06)69251-9
- 16 12 11. Okorodudu DO, Jumean MF, Montori VM, et al. Diagnostic performance of body mass index to identify obesity as defined by body adiposity: a systematic review and meta-analysis. *Int J Obes (Lond)* 2010;34(5):791-9. doi: 10.1038/ijo.2010.5
- 17 13 12. Gallagher D, Heymsfield SB, Heo M, et al. Healthy percentage body fat ranges: an approach for developing guidelines based on body mass index. *Am J Clin Nutr* 2000;72(3):694-701.
- 18 14 13. Heitmann BL, Erikson H, Ellsinger BM, et al. Mortality associated with body fat, fat-free mass and body mass index among 60-year-old swedish men-a 22-year follow-up. The study of men born in 1913. *Int J Obes Relat Metab Disord* 2000;24(1):33-7.
- 19 15 14. Ortega FB, Sui X, Lavie CJ, et al. Body Mass Index, the most widely used but also widely criticized index: Would a criterion standard measure of total body fat be a better predictor of cardiovascular disease mortality? *Mayo Clin Proc* 2016;91(4):443-55.
- 20 16 15. Padwal R, Leslie WD, Lix LM, et al. Relationship Among Body Fat Percentage, Body Mass Index, and All-Cause Mortality: A Cohort Study. *Ann Intern Med* 2016;164(8):532-41.
- 21 17 16. Zong G, Zhang Z, Yang Q, et al. Total and regional adiposity measured by dual-energy X-ray absorptiometry and mortality in NHANES 1999-2006. *Obesity (Silver Spring)* 2016;24(11):2414-21. doi: 10.1002/oby.21659
- 22 18 17. Dong B, Peng Y, Wang Z, et al. Joint association between body fat and its distribution with all-cause mortality: A data linkage cohort study based on NHANES (1988-2011). *PLoS One* 2018;13(2):e0193368. doi: 10.1371/journal.pone.0193368
- 23 19 18. Lahmann PH, Lissner L, Gullberg B, et al. A prospective study of adiposity and all-cause mortality: the Malmo Diet and Cancer Study. *Obes Res* 2002;10(5):361-9. doi: 10.1038/oby.2002.50
- 24 20 19. Jenkins DA, Bowden J, Robinson HA, et al. Adiposity-mortality relationships in type 2 diabetes, coronary heart disease, and cancer subgroups in the UK Biobank, and their modification by smoking. *Diabetes Care* 2018;41(9):1878-86. doi: 10.2337/dc17-2508

- 1 20. Jayedi A, Khan TA, Aune D, et al. Body fat and risk of all-cause mortality: a systematic  
2 review and dose-response meta-analysis of prospective cohort studies. *Int J Obes (Lond)*  
3 2022;46(9):1573-81. doi: 10.1038/s41366-022-01165-5
- 4 21. Nuttall FQ. Body Mass Index: Obesity, BMI, and Health: A Critical Review. *Nutr Today*  
5 2015;50(3):117-28. doi: 10.1097/NT.000000000000092
- 6 22. CDC. Body mass index : considerations for practitioners.  
7 <https://stacks.cdc.gov/view/cdc/25368> [Accessed December 8, 2021].
- 8 23. Woolcott OO, Bergman RN. Relative fat mass (RFM) as a new estimator of whole-body fat  
9 percentage — A cross-sectional study in American adult individuals. *Sci Rep*  
10 2018;8(1):10980. doi: doi.org/10.1038/s41598-018-29362-1
- 11 24. Paek JK, Kim J, Kim K, et al. Usefulness of relative fat mass in estimating body adiposity in  
12 Korean adult population. *Endocr J* 2019;66(8):723-29. doi: 10.1507/endocrj.EJ19-0064
- 13 25. Guzman-Leon AE, Velarde AG, Vidal-Salas M, et al. External validation of the relative fat  
14 mass (RFM) index in adults from north-west Mexico using different reference methods.  
15 *PLoS One* 2019;14(12):e0226767. doi: 10.1371/journal.pone.0226767
- 16 26. Correa CR, Formolo NPS, Dezanetti T, et al. Relative fat mass is a better tool to diagnose  
17 high adiposity when compared to body mass index in young male adults: A cross-section  
18 study. *Clin Nutr ESPEN* 2021;41:225-33. doi: 10.1016/j.clnesp.2020.12.009
- 19 27. Woolcott OO, Bergman RN. Defining cutoffs to diagnose obesity using the relative fat mass  
20 (RFM): Association with mortality in NHANES 1999-2014. *Int J Obes (Lond)* 2020;44:1301-  
21 10. doi: 10.1038/s41366-019-0516-8
- 22 28. Liu B, Du Y, Wu Y, et al. Trends in obesity and adiposity measures by race or ethnicity  
23 among adults in the United States 2011-18: population based study. *BMJ* 2021;372:n365.  
24 doi: 10.1136/bmj.n365
- 25 29. Gupta RD, Chakraborty PA, Al Kibria GM. Racial/Ethnic disparities in prevalence and trends  
26 of obesity, grade 3 obesity, and abdominal obesity among US adults, 2003-18. *Obesity*  
27 *Medicine* 2021;28 (no pagination)(100372) doi:  
28 <https://dx.doi.org/10.1016/j.obmed.2021.100372>
- 29 30. CDC. NHANES 2017-March 2020 pre-pandemic data release notes.  
30 <https://wwwn.cdc.gov/nchs/nhanes/continuousnhanes/releasenotes.aspx?Cycle=2017-2020>  
31 [Accessed October 10, 2022].
- 32 31. Day JC. Population Projections of the United States by Age, Sex, Race, and Hispanic  
33 Origin: 1995 to 2050, U.S. Bureau of the Census, Current Population Reports. Reports,  
34 P25-1130, U.S. Washington, DC, 1996.
- 35 32. National Health and Nutrition Examination Survey (NHANES). Anthropometry procedures  
36 manual. [http://www.cdc.gov/nchs/data/nhanes/nhanes\\_07\\_08/manual\\_an.pdf](http://www.cdc.gov/nchs/data/nhanes/nhanes_07_08/manual_an.pdf) [Accessed  
37 May 16, 2016].
- 38 33. CDC. NHANES response rates and population totals. Available at:  
39 <https://wwwn.cdc.gov/nchs/nhanes/responserates.aspx>. Accessed July 19, 2022.
- 40 34. HHS. U.S. Department of Health & Human Services. Federal policy for the protection of  
41 human subjects. [https://www.hhs.gov/ohrp/regulations-and-policy/regulations/common-](https://www.hhs.gov/ohrp/regulations-and-policy/regulations/common-rule/index.html)  
42 [rule/index.html](https://www.hhs.gov/ohrp/regulations-and-policy/regulations/common-rule/index.html). Accessed April 2, 2022., 2020.
- 43 35. Johnson CL, Paulose-Ram R, Ogden CL, et al. National health and nutrition examination  
44 survey: analytic guidelines, 1999-2010. *Vital Health Stat 2* 2013(161):1-24.
- 45 36. CDC. National Health and Nutrition Examination Survey. Module 1: Datasets and  
46 Documentation. <https://wwwn.cdc.gov/nchs/nhanes/tutorials/module1.aspx> [accessed July  
47 18, 2022].
- 48 37. Durrleman S, Simon R. Flexible regression models with cubic splines. *Stat Med*  
49 1989;8(5):551-61. doi: 10.1002/sim.4780080504
- 50 38. Harrell FE. Regression modeling strategies: With applications to linear models, logistic  
51 regression, and survival analysis. New York: Springer 2001.

- 1 39. Cox NJ. Speaking Stata: Smoothing in various directions. *Stata Journal* 2005;5(4):574-93.
- 2 40. Flegal KM, Carroll MD, Kit BK, et al. Prevalence of obesity and trends in the distribution of
- 3 body mass index among US adults, 1999-2010. *JAMA* 2012;307(5):491-7.
- 4 41. Lakerveld J, Mackenbach J. The upstream determinants of adult obesity. *Obes Facts*
- 5 2017;10(3):216-22. doi: 10.1159/000471489
- 6 42. Edston E. A correlation between the weight of visceral adipose tissue and selected
- 7 anthropometric indices: an autopsy study. *Clin Obes* 2013;3(3-4):84-9. doi:
- 8 10.1111/cob.12021
- 9 43. Conway JM, Chanetsa FF, Wang P. Intraabdominal adipose tissue and anthropometric
- 10 surrogates in African American women with upper- and lower-body obesity. *Am J Clin Nutr*
- 11 1997;66(6):1345-51. doi: 10.1093/ajcn/66.6.1345
- 12 44. Novak LP. Aging, total body potassium, fat-free mass, and cell mass in males and females
- 13 between ages 18 and 85 years. *J Gerontol* 1972;27(4):438-43. doi: 10.1093/geronj/27.4.438
- 14 45. Deurenberg P, Weststrate JA, Seidell JC. Body mass index as a measure of body fatness:
- 15 age- and sex-specific prediction formulas. *Br J Nutr* 1991;65(2):105-14.
- 16 46. Noppa H, Andersson M, Bengtsson C, et al. Body composition in middle-aged women with
- 17 special reference to the correlation between body fat mass and anthropometric data. *Am J*
- 18 *Clin Nutr* 1979;32(7):1388-95.
- 19 47. Jensky-Squires NE, Dieli-Conwright CM, Rossuello A, et al. Validity and reliability of body
- 20 composition analysers in children and adults. *Br J Nutr* 2008;100(4):859-65. doi:
- 21 10.1017/S0007114508925460
- 22 48. Kuk JL, Saunders TJ, Davidson LE, et al. Age-related changes in total and regional fat
- 23 distribution. *Ageing Res Rev* 2009;8(4):339-48. doi: 10.1016/j.arr.2009.06.001
- 24 49. Schwartz RS. Obesity in the elderly: Prevalence, consequences, and treatment. In: Bray
- 25 GA, Bouchard C, eds. Handbook of obesity Etiology and pathophysiology. Second edition
- 26 ed. New York: Marcel Dekker, Inc. 2004:135-48.
- 27 50. Chen Y, Zhang XP, Yuan J, et al. Association of body mass index and age with incident
- 28 diabetes in Chinese adults: a population-based cohort study. *BMJ Open* 2018;8(9):e021768.
- 29 doi: 10.1136/bmjopen-2018-021768
- 30 51. Lind L, Sundstrom J, Arnlov J, et al. Impact of aging on the strength of cardiovascular risk
- 31 factors: A longitudinal study over 40 years. *J Am Heart Assoc* 2018;7(1) doi:
- 32 10.1161/JAHA.117.007061
- 33 52. Masaki KH, Curb JD, Chiu D, et al. Association of body mass index with blood pressure in
- 34 elderly Japanese American men. The Honolulu Heart Program. *Hypertension*
- 35 1997;29(2):673-7. doi: 10.1161/01.hyp.29.2.673
- 36 53. Tromp J, Paniagua SMA, Lau ES, et al. Age dependent associations of risk factors with
- 37 heart failure: pooled population based cohort study. *BMJ* 2021;372:n461. doi:
- 38 10.1136/bmj.n461
- 39 54. Chang SH, Beason TS, Hunleth JM, et al. A systematic review of body fat distribution and
- 40 mortality in older people. *Maturitas* 2012;72(3):175-91. doi: 10.1016/j.maturitas.2012.04.004
- 41 [published Online First: 2012/05/19]
- 42 55. Lee CD, Blair SN, Jackson AS. Cardiorespiratory fitness, body composition, and all-cause
- 43 and cardiovascular disease mortality in men. *Am J Clin Nutr* 1999;69(3):373-80. doi:
- 44 10.1093/ajcn/69.3.373
- 45 56. Lobman TG, Houtkooper L, Going SB. Body Fat Measurement Goes High-Tech: Not All Are
- 46 Created Equal. *ACSM's Health & Fitness Journal* 1997;1(1):30-35.
- 47 57. Brodersen J, Schwartz LM, Heneghan C, et al. Overdiagnosis: what it is and what it isn't.
- 48 *BMJ Evid Based Med* 2018;23(1):1-3. doi: 10.1136/ebmed-2017-110886
- 49 58. Puhl RM, Heuer CA. Obesity stigma: important considerations for public health. *Am J Public*
- 50 *Health* 2010;100(6):1019-28. doi: 10.2105/AJPH.2009.159491

## 1 **FIGURE LEGENDS**

### 2 **Figure 1. Age-adjusted U.S. adult prevalence trends in RFM-defined obesity by sex: 1999-**

3 **2000 through 2017-March 2020.** Trend lines were smoothed using the Lowes method on

4 weighted prevalence estimates. Body fat-defined obesity was determined using the relative fat

5 mass (RFM). RFM was calculated as follows:  $RFM = 64 - (20 \times \text{height/waist circumference}) +$

6  $(12 \times \text{sex})$ ; sex equals 0 for men and 1 for women. Obesity was diagnosed if RFM was 40% or

7 higher for women and RFM was 30% or higher for men.

### 8 **Figure 2. Age-adjusted U.S. adult prevalence trends in RFM-defined obesity by ethnicity:**

9 **1999-2000 through 2017-March 2020.** Trend lines were smoothed using the Lowes method on

10 weighted prevalence estimates. The relative fat mass (RFM) was calculated as follows:  $RFM =$

11  $64 - (20 \times \text{height/waist circumference}) + (12 \times \text{sex})$ ; sex equals 0 for men and 1 for women.

12 Obesity was diagnosed if RFM was 40% or higher for women and RFM was 30% or higher for

13 men.

### 14 **Figure 3. Age-adjusted U.S. adult prevalence trends in RFM-defined obesity by age**

15 **group: 1999-2000 through 2017-March 2020.** Trend lines were smoothed using the Lowes

16 method on weighted prevalence estimates. The relative fat mass (RFM) was calculated as

17 follows:  $RFM = 64 - (20 \times \text{height/waist circumference}) + (12 \times \text{sex})$ ; sex equals 0 for men and 1

18 for women. Obesity was diagnosed if RFM was 40% or higher for women and RFM was 30% or

19 higher for men.

1  
2  
3  
4  
5  
6  
7  
8  
9  
10  
11  
12  
13  
14  
15  
16  
17  
18  
19  
20  
21  
22  
23  
24  
25  
26  
27  
28  
29  
30  
31  
32  
33  
34  
35  
36  
37  
38  
39  
40  
41  
42  
43  
44  
45  
46  
47  
48  
49  
50  
51  
52  
53  
54  
55  
56  
57  
58  
59  
60

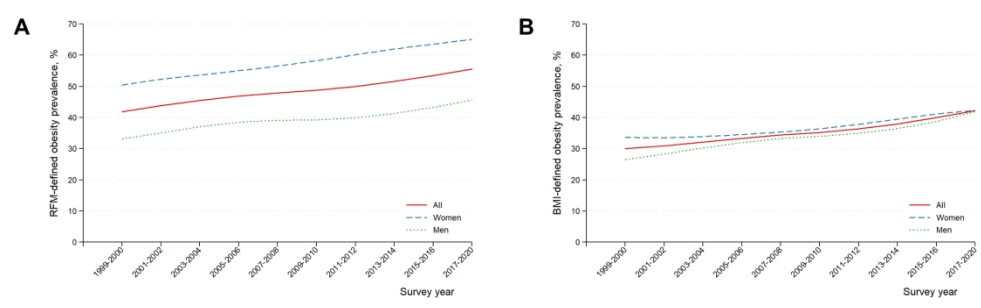

Figure 1. Age-adjusted U.S. adult prevalence trends in RFM-defined obesity by sex: 1999-2000 through 2017-March 2020.

762x228mm (96 x 96 DPI)

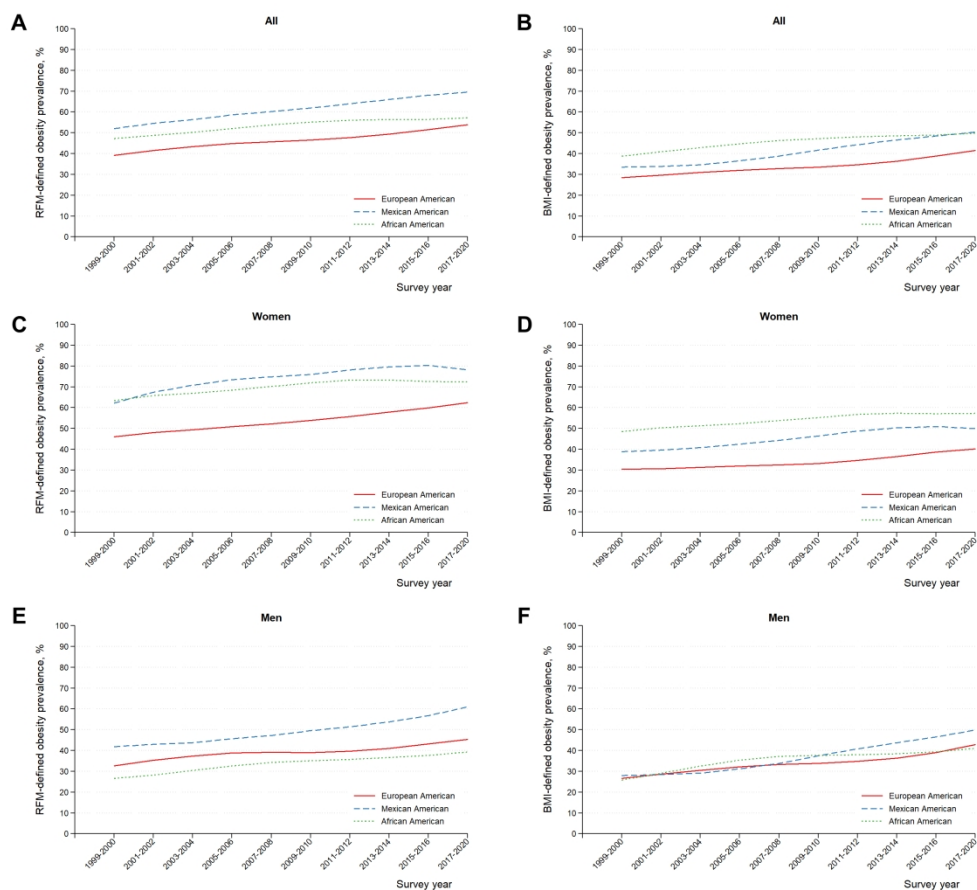

Figure 2. Age-adjusted U.S. adult prevalence trends in RFM-defined obesity by ethnicity: 1999-2000 through 2017-March 2020.

762x711mm (96 x 96 DPI)



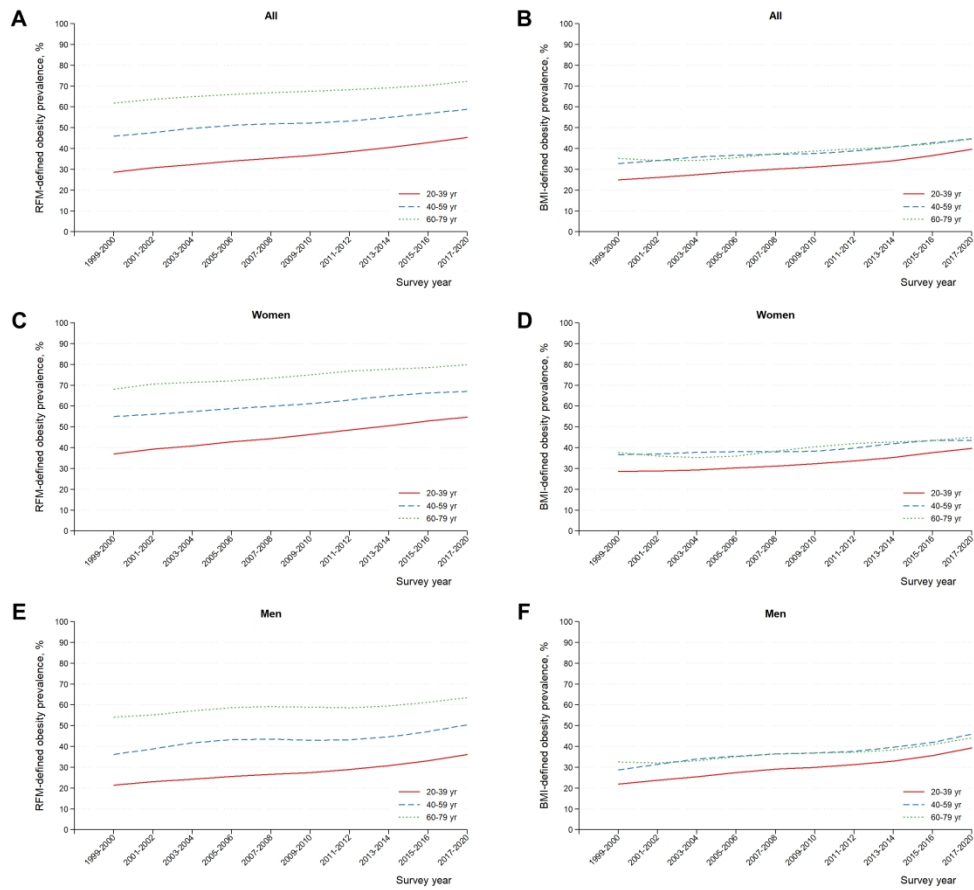

Figure 3. Age-adjusted U.S. adult prevalence trends in RFM-defined obesity by age group: 1999-2000 through 2017-March 2020.

762x711mm (96 x 96 DPI)

## Supplementary Material

### Trends in obesity defined by the relative fat mass (RFM) index among adults in the United States from 1999 to 2020: population-based study

Orison O. Woolcott<sup>1,2,\*</sup>, Till Seuring<sup>3</sup>

*<sup>1</sup>Ronin Institute, Montclair, NJ, USA; <sup>2</sup>Institute for Globally Distributed Open Research and Education (IGDORE), Los Angeles, CA, USA; <sup>3</sup>Luxembourg Institute of Socio-Economic Research (LISER), Esch-sur-Alzette, Luxembourg*

**Supplementary Table 1.** Characteristics of study participants with missing data.\*

| Characteristic          | All           | With complete data | With missing data |
|-------------------------|---------------|--------------------|-------------------|
| Sample size, n (%)      | 50,283 (100)  | 47,667 (95.6)      | 2,616 (4.4)       |
| Median age (IQR), years | 45 (33-58)    | 45 (33-58)         | 47 (34-63)        |
| Male sex, n (%)         | 24,954 (49.2) | 23,736 (49.4)      | 1,218 (45.4)      |
| Ethnicity, n (%)        |               |                    |                   |
| Mexican American        | 8,827 (8.3)   | 8,416 (8.3)        | 411 (8.6)         |
| European American       | 20,618 (66.9) | 19,691 (67.2)      | 927 (58.6)        |
| African American        | 11,433 (11.4) | 10,673 (11.2)      | 760 (16.7)        |
| Other/multi-racial      | 9,405 (13.4)  | 8,887 (13.2)       | 518 (16.1)        |

\* Sample size represents unweighted data. Estimates represent weighted data.

**NHANES 1999-March 2020**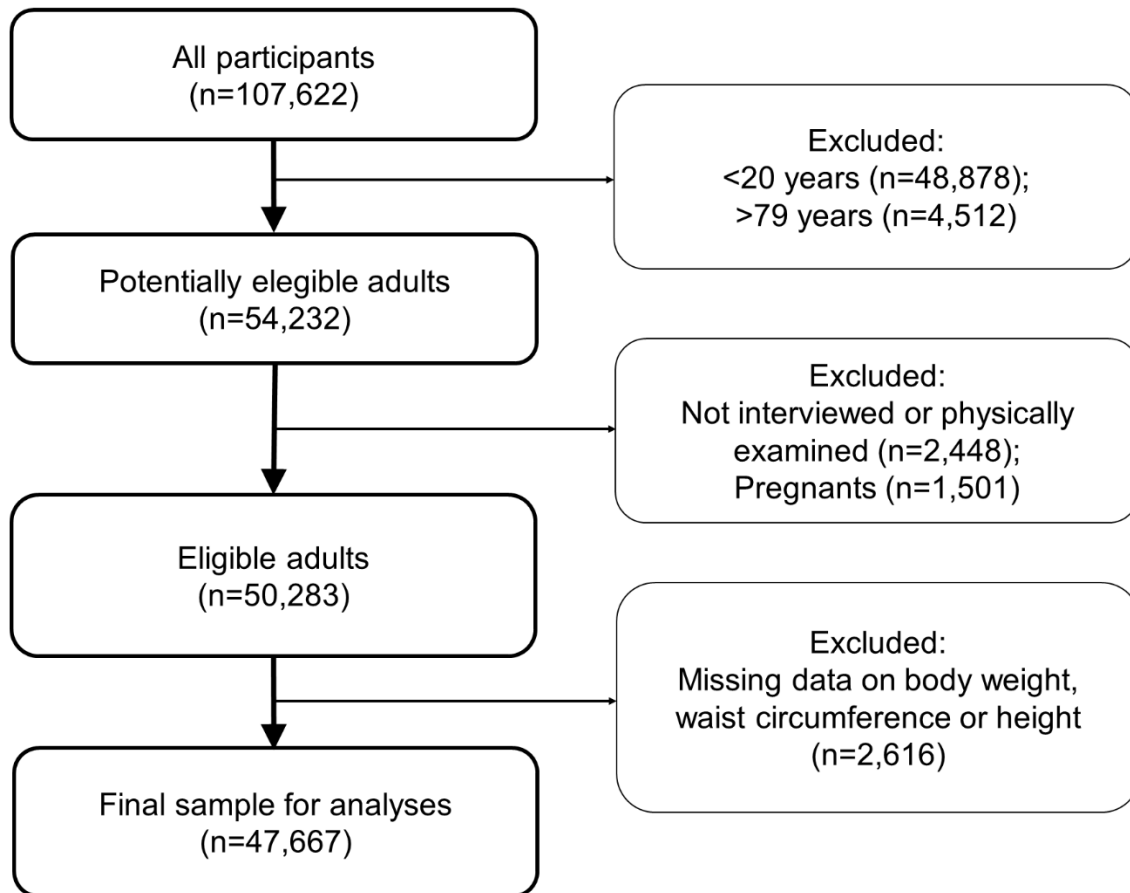**Supplementary Figure 1**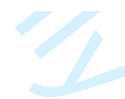

## STROBE Statement—checklist of items that should be included in reports of observational studies

|                              | Item No | Recommendation                                                                                                                                                                                                                                                                                                                                                                                                                                                         | Page No |
|------------------------------|---------|------------------------------------------------------------------------------------------------------------------------------------------------------------------------------------------------------------------------------------------------------------------------------------------------------------------------------------------------------------------------------------------------------------------------------------------------------------------------|---------|
| <b>Title and abstract</b>    | 1       | (a) Indicate the study's design with a commonly used term in the title or the abstract                                                                                                                                                                                                                                                                                                                                                                                 | 1       |
|                              |         | (b) Provide in the abstract an informative and balanced summary of what was done and what was found                                                                                                                                                                                                                                                                                                                                                                    | 3       |
| <b>Introduction</b>          |         |                                                                                                                                                                                                                                                                                                                                                                                                                                                                        |         |
| Background/rationale         | 2       | Explain the scientific background and rationale for the investigation being reported                                                                                                                                                                                                                                                                                                                                                                                   | 5-6     |
| Objectives                   | 3       | State specific objectives, including any prespecified hypotheses                                                                                                                                                                                                                                                                                                                                                                                                       | 6       |
| <b>Methods</b>               |         |                                                                                                                                                                                                                                                                                                                                                                                                                                                                        |         |
| Study design                 | 4       | Present key elements of study design early in the paper                                                                                                                                                                                                                                                                                                                                                                                                                | 7       |
| Setting                      | 5       | Describe the setting, locations, and relevant dates, including periods of recruitment, exposure, follow-up, and data collection                                                                                                                                                                                                                                                                                                                                        | 7-8     |
| Participants                 | 6       | (a) <i>Cohort study</i> —Give the eligibility criteria, and the sources and methods of selection of participants. Describe methods of follow-up<br><i>Case-control study</i> —Give the eligibility criteria, and the sources and methods of case ascertainment and control selection. Give the rationale for the choice of cases and controls<br><i>Cross-sectional study</i> —Give the eligibility criteria, and the sources and methods of selection of participants | 7       |
|                              |         | (b) <i>Cohort study</i> —For matched studies, give matching criteria and number of exposed and unexposed<br><i>Case-control study</i> —For matched studies, give matching criteria and the number of controls per case                                                                                                                                                                                                                                                 |         |
| Variables                    | 7       | Clearly define all outcomes, exposures, predictors, potential confounders, and effect modifiers. Give diagnostic criteria, if applicable                                                                                                                                                                                                                                                                                                                               | 7-9     |
| Data sources/<br>measurement | 8*      | For each variable of interest, give sources of data and details of methods of assessment (measurement). Describe comparability of assessment methods if there is more than one group                                                                                                                                                                                                                                                                                   | 7-9     |
| Bias                         | 9       | Describe any efforts to address potential sources of bias                                                                                                                                                                                                                                                                                                                                                                                                              | 8-9     |
| Study size                   | 10      | Explain how the study size was arrived at                                                                                                                                                                                                                                                                                                                                                                                                                              | 7       |
| Quantitative variables       | 11      | Explain how quantitative variables were handled in the analyses. If applicable, describe which groupings were chosen and why                                                                                                                                                                                                                                                                                                                                           | 8-9     |
| Statistical methods          | 12      | (a) Describe all statistical methods, including those used to control for confounding                                                                                                                                                                                                                                                                                                                                                                                  | 8-9     |
|                              |         | (b) Describe any methods used to examine subgroups and interactions                                                                                                                                                                                                                                                                                                                                                                                                    | 8-9     |
|                              |         | (c) Explain how missing data were addressed                                                                                                                                                                                                                                                                                                                                                                                                                            | 8       |
|                              |         | (d) <i>Cohort study</i> —If applicable, explain how loss to follow-up was addressed<br><i>Case-control study</i> —If applicable, explain how matching of cases and controls was addressed<br><i>Cross-sectional study</i> —If applicable, describe analytical methods taking account of sampling strategy                                                                                                                                                              | 7,9     |
|                              |         | (e) Describe any sensitivity analyses                                                                                                                                                                                                                                                                                                                                                                                                                                  | NA      |

Continued on next page

| <b>Results</b>           |     |                                                                                                                                                                                                              |               |
|--------------------------|-----|--------------------------------------------------------------------------------------------------------------------------------------------------------------------------------------------------------------|---------------|
| Participants             | 13* | (a) Report numbers of individuals at each stage of study—eg numbers potentially eligible, examined for eligibility, confirmed eligible, included in the study, completing follow-up, and analysed            | 10            |
|                          |     | (b) Give reasons for non-participation at each stage                                                                                                                                                         | 10            |
|                          |     | (c) Consider use of a flow diagram                                                                                                                                                                           | Suppl Fig 1   |
| Descriptive data         | 14* | (a) Give characteristics of study participants (eg demographic, clinical, social) and information on exposures and potential confounders                                                                     | 10            |
|                          |     | (b) Indicate number of participants with missing data for each variable of interest                                                                                                                          | Suppl Table 1 |
|                          |     | (c) <i>Cohort study</i> —Summarise follow-up time (eg, average and total amount)                                                                                                                             |               |
| Outcome data             | 15* | <i>Cohort study</i> —Report numbers of outcome events or summary measures over time                                                                                                                          |               |
|                          |     | <i>Case-control study</i> —Report numbers in each exposure category, or summary measures of exposure                                                                                                         |               |
|                          |     | <i>Cross-sectional study</i> —Report numbers of outcome events or summary measures                                                                                                                           | 10-17         |
| Main results             | 16  | (a) Give unadjusted estimates and, if applicable, confounder-adjusted estimates and their precision (eg, 95% confidence interval). Make clear which confounders were adjusted for and why they were included | 8, 10         |
|                          |     | (b) Report category boundaries when continuous variables were categorized                                                                                                                                    | 15-16         |
|                          |     | (c) If relevant, consider translating estimates of relative risk into absolute risk for a meaningful time period                                                                                             | NA            |
| Other analyses           | 17  | Report other analyses done—eg analyses of subgroups and interactions, and sensitivity analyses                                                                                                               | 12-17         |
| <b>Discussion</b>        |     |                                                                                                                                                                                                              |               |
| Key results              | 18  | Summarise key results with reference to study objectives                                                                                                                                                     | 18            |
| Limitations              | 19  | Discuss limitations of the study, taking into account sources of potential bias or imprecision. Discuss both direction and magnitude of any potential bias                                                   | 20            |
| Interpretation           | 20  | Give a cautious overall interpretation of results considering objectives, limitations, multiplicity of analyses, results from similar studies, and other relevant evidence                                   | 20-21         |
| Generalisability         | 21  | Discuss the generalisability (external validity) of the study results                                                                                                                                        | 20            |
| <b>Other information</b> |     |                                                                                                                                                                                                              |               |
| Funding                  | 22  | Give the source of funding and the role of the funders for the present study and, if applicable, for the original study on which the present article is based                                                | 23            |

\*Give information separately for cases and controls in case-control studies and, if applicable, for exposed and unexposed groups in cohort and cross-sectional studies.

**Note:** An Explanation and Elaboration article discusses each checklist item and gives methodological background and published examples of transparent reporting. The STROBE checklist is best used in conjunction with this article (freely available on the Web sites of PLoS Medicine at <http://www.plosmedicine.org/>, Annals of Internal Medicine at <http://www.annals.org/>, and Epidemiology at <http://www.epidem.com/>). Information on the STROBE Initiative is available at [www.strobe-statement.org](http://www.strobe-statement.org).

# BMJ Open

## Temporal trends in obesity defined by the relative fat mass (RFM) index among adults in the United States from 1999 to 2020: population-based study

|                                 |                                                                                                                                                                                      |
|---------------------------------|--------------------------------------------------------------------------------------------------------------------------------------------------------------------------------------|
| Journal:                        | <i>BMJ Open</i>                                                                                                                                                                      |
| Manuscript ID                   | bmjopen-2022-071295.R1                                                                                                                                                               |
| Article Type:                   | Original research                                                                                                                                                                    |
| Date Submitted by the Author:   | 25-May-2023                                                                                                                                                                          |
| Complete List of Authors:       | Woolcott, Orison; Ronin Institute; Institute for Globally Distributed Open Research and Education (IGDORE)<br>Seuring, Till; Luxembourg Institute of Socio-Economic Research (LISER) |
| <b>Primary Subject Heading</b>: | Epidemiology                                                                                                                                                                         |
| Secondary Subject Heading:      | Diabetes and endocrinology, General practice / Family practice, Public health                                                                                                        |
| Keywords:                       | EPIDEMIOLOGY, PUBLIC HEALTH, General endocrinology < DIABETES & ENDOCRINOLOGY, GENERAL MEDICINE (see Internal Medicine), Obesity                                                     |
|                                 |                                                                                                                                                                                      |

SCHOLARONE™  
Manuscripts



I, the Submitting Author has the right to grant and does grant on behalf of all authors of the Work (as defined in the below author licence), an exclusive licence and/or a non-exclusive licence for contributions from authors who are: i) UK Crown employees; ii) where BMJ has agreed a CC-BY licence shall apply, and/or iii) in accordance with the terms applicable for US Federal Government officers or employees acting as part of their official duties; on a worldwide, perpetual, irrevocable, royalty-free basis to BMJ Publishing Group Ltd ("BMJ") its licensees and where the relevant Journal is co-owned by BMJ to the co-owners of the Journal, to publish the Work in this journal and any other BMJ products and to exploit all rights, as set out in our [licence](#).

The Submitting Author accepts and understands that any supply made under these terms is made by BMJ to the Submitting Author unless you are acting as an employee on behalf of your employer or a postgraduate student of an affiliated institution which is paying any applicable article publishing charge ("APC") for Open Access articles. Where the Submitting Author wishes to make the Work available on an Open Access basis (and intends to pay the relevant APC), the terms of reuse of such Open Access shall be governed by a Creative Commons licence – details of these licences and which [Creative Commons](#) licence will apply to this Work are set out in our licence referred to above.

Other than as permitted in any relevant BMJ Author's Self Archiving Policies, I confirm this Work has not been accepted for publication elsewhere, is not being considered for publication elsewhere and does not duplicate material already published. I confirm all authors consent to publication of this Work and authorise the granting of this licence.



1  
2  
3 1 **Temporal trends in obesity defined by the relative fat mass (RFM) index among**  
4  
5 2 **adults in the United States from 1999 to 2020: population-based study**  
6  
7  
8 3

9  
10 4 Orison O. Woolcott, research scientist<sup>1,2,\*</sup>, Till Seuring, postdoctoral fellow<sup>3</sup>  
11  
12 5

13  
14 6 *<sup>1</sup>Ronin Institute, Montclair, NJ, USA; <sup>2</sup>Institute for Globally Distributed Open Research and*  
15  
16 7 *Education (IGDORE), Los Angeles, CA, USA; <sup>3</sup>Luxembourg Institute of Socio-Economic*  
17  
18 8 *Research (LISER), Esch-sur-Alzette, Luxembourg*  
19  
20

21 9  
22  
23 10  
24 11  
25 12  
26 13  
27 14  
28 15  
29 16  
30 16  
31 17 Correspondence:

32 18  
33 19 Orison O. Woolcott, M.D.  
34 20 Ronin Institute  
35 21 Montclair, NJ  
36 22 United States of America  
37 23 Telephone: +1 (323) 253-2562  
38 24 Email: [Orison.Woolcott@gmail.com](mailto:Orison.Woolcott@gmail.com)  
39 25  
40 26

41 27 Abstract word count: 300

42  
43 28 Text word count: 3,918  
44  
45 29

46  
47 30 Keywords: General Obesity, NHANES, Prevalence, Relative Fat Mass, RFM, Trends.  
48  
49  
50  
51  
52  
53  
54  
55  
56  
57

## 1 **ABSTRACT**

2 **Objectives:** The body mass index (BMI) largely underestimates excess body fat, suggesting  
3 that the prevalence of obesity could be underestimated. Biologically, women are known to have  
4 higher body fat than men. This study aimed to compare the temporal trends in general obesity  
5 by sex, ethnicity, and age among adults in the United States using the relative fat mass (RFM),  
6 a validated surrogate for whole-body fat percentage, and BMI.

7 **Design:** Population-based study

8 **Setting:** U.S. National Health and Nutrition Examination Survey (NHANES), from 1999-2000  
9 through 2017-March 2020.

10 **Participants:** A representative sample of adults 20-79 years in the U.S.

11 **Main outcome measures:** Age-adjusted prevalence of general obesity. RFM-defined obesity  
12 was diagnosed using validated cutoffs to predict all-cause mortality: RFM  $\geq 40\%$  for women and  
13  $\geq 30\%$  for men. BMI-defined obesity was diagnosed using a cutoff of 30 kg/m<sup>2</sup>.

14 **Results:** Analysis included data from 47,667 adults. Among women, RFM-defined obesity  
15 prevalence was 64.7% (95% confidence interval, 62.1-67.3%) in 2017-2020, a linear increase of  
16 13.9 percentage points (9.0-18.9%;  $P < 0.001$ ) relative to 1999-2000. In contrast, the prevalence  
17 of BMI-defined obesity was 42.2% (39.4-45.0%) in 2017-2020. Among men, the corresponding  
18 RFM-defined obesity prevalence was 45.8% (42.0-49.7%), a linear increase of 12.0 percentage  
19 points (6.6-17.3%;  $P < 0.001$ ). In contrast, the prevalence of BMI-defined obesity was 42.0 (37.8-  
20 46.3%). The highest prevalence of RFM-defined obesity across years was observed in older  
21 adults (60-79 years) and Mexican Americans, in women and men. Conversely, the highest  
22 prevalence of BMI-defined obesity across years was observed in middle-age (40-59 years) and  
23 older adults, and in African American women.

1  
2  
3 1 **Conclusions:** The use of a surrogate for whole-body fat percentage revealed a much higher  
4  
5 2 prevalence of general obesity in the U.S. from 1999 to 2020, particularly among women, than  
6  
7 3 that estimated using BMI, and detected a disproportionate higher prevalence of general obesity  
8  
9 4 in older adults and Mexican Americans.  
10  
11  
12 5  
13  
14  
15  
16  
17  
18  
19  
20  
21  
22  
23  
24  
25  
26  
27  
28  
29  
30  
31  
32  
33  
34  
35  
36  
37  
38  
39  
40  
41  
42  
43  
44  
45  
46  
47  
48  
49  
50  
51  
52  
53  
54  
55  
56  
57  
58  
59  
60

For peer review only

**STRENGTHS AND LIMITATIONS OF THIS STUDY**

- RFM is a validated surrogate for whole-body fat percentage that has a high diagnostic accuracy (91%) for DXA-defined obesity.
- The diagnosis of obesity was based on measured anthropometrics and validated RFM cutoffs associated with increased risk for all-cause mortality.
- RFM requires only waist circumference and height for its calculation.
- The proportion of obesity misclassification is not trivial when using RFM.
- Estimates of temporal trends in obesity was not possible for Asian Americans.

peer review only

## 1 INTRODUCTION

2 The prevalence of obesity (excess body fat) in the United States has doubled from 15.0% in  
3 1976-1980 to 30.9% in 1999-2000 <sup>1</sup>, and it continues to increase <sup>2,3</sup>. The age-adjusted  
4 prevalence of obesity among adults in the U.S. has been estimated at 41.9% in 2017-March  
5 2020 <sup>4</sup>. Obesity diagnosis is based on the body mass index (BMI), an indirect measure of body  
6 fat <sup>5,6</sup>. BMI is calculated as the ratio of body weight in kilograms to the square of the height in  
7 meters <sup>7</sup>. BMI does not distinguish between fat mass and fat-free mass and does not account  
8 for differences in adiposity between women and men. Biologically, women are known to have  
9 higher body fat than men <sup>8-12</sup>. A meta-analysis of 25 international studies comprising nearly  
10 32,000 adults concluded that BMI underestimates ~50% of all individuals with excess body fat  
11 percentage determined by reference techniques <sup>11</sup>, suggesting that the prevalence of obesity  
12 could be largely underestimated among countries.

13 There is robust evidence linking high whole-body fat percentage with increased risk of death <sup>13-</sup>  
14 <sup>20</sup>, supporting the need for a better assessment of body adiposity. Although the limitations of  
15 BMI to assess body adiposity are widely acknowledged <sup>6,8-11,21,22</sup>, BMI remains the most widely  
16 used anthropometric index in clinical practice, epidemiology, and public health, given its  
17 simplicity, very low cost, and its association with several clinical conditions and mortality <sup>6</sup>. The  
18 high cost and time required to assess body adiposity using more accurate techniques such as  
19 dual-energy x-ray absorptiometry (DXA), dual-labeled water, or magnetic resonance, prevents  
20 their use in large populations or clinical practice as part of routine screening.

21 The relative fat mass (RFM) is a simple and low-cost anthropometric index developed to  
22 estimate whole-body fat percentage <sup>23</sup>. RFM is a linear equation based on the ratio of height to  
23 waist circumference that has been validated in Mexican, European, and African Americans <sup>23</sup>,  
24 and in other populations <sup>24-26</sup>. Compared with BMI, RFM resulted in lower obesity  
25 misclassification when DXA was used as the reference method for diagnosing obesity in adults

1  
2  
3 1 <sup>24 27</sup>. The accuracy of RFM in diagnosing high body fat percentage is superior to that of BMI  
4  
5 2 among men and similar to BMI among women <sup>23</sup>. In an analysis of a representative sample of  
6  
7 3 the U.S. adult population (NHANES 1999-2006), RFM had a diagnostic accuracy of 91% (C-  
8  
9 4 statistic = 0.91) for DXA-defined obesity in women and men <sup>27</sup>.

10  
11  
12 5 Recent studies have examined the U.S. prevalence trends in obesity using BMI as diagnostic  
13  
14 6 tool <sup>3 28 29</sup>. Although data on body fat percentage have also been reported for the U.S. adult  
15  
16 7 population <sup>28</sup>, no body fat cutoffs were used to diagnose general obesity, and the analyses were  
17  
18 8 limited to adults 20-59 years only, and for the period 2011-2018. In fact, body composition has  
19  
20 9 been inconsistently assessed across NHANES survey cycles and across age groups. In  
21  
22 10 addition, no study has compared the trends of general obesity in the U.S. using RFM, a  
23  
24 11 surrogate for body fat percentage, and BMI. Furthermore, no study has examined current  
25  
26 12 obesity trends among U.S. adults over a period of nearly 22 years. The aim of this study was to  
27  
28 13 compare the temporal trends in general obesity by sex, ethnicity, and age group among adults  
29  
30 14 in the U.S. from 1999 to 2020 using RFM and BMI.  
31  
32  
33  
34  
35  
36  
37  
38  
39  
40  
41  
42  
43  
44  
45  
46  
47  
48  
49  
50  
51  
52  
53  
54  
55  
56  
57  
58  
59  
60

## 1 MATERIAL AND METHODS

### 2 Study design, data source, and participants

3 In this population-based study, we performed an analysis of cross-sectional individual-level data  
4 collected by the National Health and Nutrition Examination Survey (NHANES) through  
5 interviews and physical examination in a subset of a representative sample of the U.S.  
6 population from 1999-2000 through 2017-March 2020. Initial complete dataset included 107,622  
7 participants of all ages. NHANES suspended data collection in March 2020 as a consequence  
8 of the COVID-19 pandemic. Thus, the most current cycle data available are “combined data  
9 collected from 2019 to March 2020 with data from the NHANES 2017-2018 cycle to form a  
10 nationally representative sample of NHANES 2017-March 2020 pre-pandemic data”<sup>30</sup>. Analysis  
11 was restricted to adults 20-79 years of age (n=54,232 potentially eligible) because of three  
12 reasons: 1) the diagnosis of obesity in younger adults is based on BMI-for-age percentiles as  
13 recommended by the Centers for Disease Control and Prevention (CDC)<sup>7</sup>; 2) in NHANES 2007-  
14 2008 and subsequent cycles, the upper age limit was 80 years, whereas in earlier cycles the  
15 age limit was 85 years; and 3) to obtain age-adjusted prevalence estimates using 5-year  
16 intervals according to the strata for age and sex available from the 2000 US Census Bureau  
17 (20-24, 25-29, 30-34, 35-39, 40-44, 45-49, 50-54, 55-59, 60-64, 65-69, 70-74, and 75-79)<sup>31</sup>.  
18 Another criterion for inclusion was that individuals had been interviewed and evaluated by  
19 physical examination. Women who reported to be pregnant or had a positive urine pregnancy  
20 test were excluded from analysis. Observations with missing data on body weight, height, or  
21 waist circumference were also excluded.

22 According to the NHANES physical examination protocol, waist circumference was measured  
23 just above the uppermost lateral border of the right ilium (hip bone). Weight and height were  
24 measured using standard methods<sup>32</sup>. Information on ethnicity was collected through a  
25 questionnaire. The mean unweighted response rate for examined sample across survey cycles

1  
2  
3 1 between 1999-2000 and 2017-March 2020 for individuals 20-79 years was 67.5% (range 50.8-  
4  
5 2 74.5%)<sup>33</sup>.

6  
7  
8 3 Since this study used publicly available de-identified data, approval from an Institutional Review  
9  
10 4 Board was not required, as indicated in the Federal Policy for the Protection of Human Subjects  
11  
12 5 (detailed in 45 CFR part 46)<sup>34</sup>.

### 14 15 6 Obesity diagnosis

16  
17  
18 7 General obesity was diagnosed using RFM, a validated surrogate for whole-body fat percentage  
19  
20 8 <sup>23</sup>, and validated cutoffs to predict all-cause mortality: RFM  $\geq 40\%$  for women and  $\geq 30\%$  for men  
21  
22 9 <sup>27</sup>. RFM was calculated as follows:  $RFM = 64 - (20 \times \text{height/waist circumference}) + (12 \times \text{sex})$ ;  
23  
24 10 sex equals 0 for men and 1 for women <sup>23</sup>. BMI-defined obesity was diagnosed if BMI was 30  
25  
26 11  $\text{kg/m}^2$  or higher <sup>7</sup>.

### 28 29 12 Statistical Analysis

30  
31  
32 13 Data collected during the survey cycles from 1999-2000 through 2017-2020 were analyzed  
33  
34 14 using sampling weights following the recommended analytic guidelines, to account for  
35  
36 15 oversampling, nonresponse rates, and subsampling for physical examination <sup>35</sup>. The proportion  
37  
38 16 of missing data was 5.2% of all eligible participants. Given this low percentage of missing data,  
39  
40 17 we performed a complete case analysis <sup>36</sup>. Since age distribution of study samples may vary  
41  
42 18 across survey cycles, all prevalence estimates were adjusted for age to make the estimates  
43  
44 19 more comparable throughout the study period <sup>31</sup>. Estimates across the age categories 20-39,  
45  
46 20 40-59, and 60-79 years were also adjusted for age using 5-year intervals according to  
47  
48 21 corresponding 2000 US Census Bureau age categories by sex <sup>31</sup>. The changes in obesity  
49  
50 22 prevalence from 1999-2000 to 2017-March 2020 were assessed using the Wald test. For  
51  
52 23 multiple comparisons of prevalence across ethnic groups and age groups, we applied the



1 Bonferroni correction. Because Asian Americans were not oversampled before NHANES 2011,  
2 our analyses by ethnicity were restricted to Mexican, European, and African Americans.

3 To determine the possible role of menopause in the high prevalence of RFM-defined obesity in  
4 women, we performed a post hoc analysis. Data related to menopause were self-reported. We  
5 defined postmenopausal women as those with natural menopause and no missing information  
6 on age at menopause. For this analysis, women were excluded if menopause occurred before  
7 age 40 or after age 62<sup>37</sup>, or if they reported oophorectomy (surgical removal of one or two  
8 ovaries), treatment with estrogen/progesterone for hysterectomy/oophorectomy, breastfeeding,  
9 pregnancy in past year of the interview, or irregular period due to medical conditions or  
10 treatment.

11 Temporal trends in prevalence of obesity were tested for the assumption of linearity using  
12 logistic regression models, comparing linear and non-linear regression models using the  
13 likelihood-ratio test<sup>38</sup>. For the non-linear models, restricted cubic splines with 3 knots were used  
14 at years 2001-2002, 2009-2010, and 2017-2020, based on the quantiles recommended by  
15 Harrel<sup>39</sup>. Survey cycles were analyzed as a continuous variable. For visualization purposes,  
16 trend lines were smoothed using the Lowes method<sup>40</sup>. Statistical significance was set to an  
17 alpha level of 0.05. All statistical analyses were performed using Stata 14 for Windows  
18 (StataCorp LP, College Station, TX). Prevalence estimates and standard errors were obtained  
19 using the survey 'svy' command with Taylor linearization.

#### 20 Patient and public involvement

21 Patients and the public were not involved in this study. This study will be available to the public  
22 once it is published in the scientific literature.

## 1 RESULTS

### 2 Clinical characteristics

3 After applying the inclusion and exclusion criteria, the final sample for analysis comprised  
 4 47,667 adults (Supplementary Figure 1). The median age of the study population was 45 years  
 5 (interquartile range: 33 to 58); 50.6% were women; 67.2% were European Americans, 11.2%  
 6 were African Americans, and 8.3% were Mexican Americans (Table 1). The overall prevalence  
 7 of obesity by ethnicity in the study participants is shown in Supplementary Table 1.

8  
 9  
 10  
 11  
 12  
 13  
 14  
 15  
 16  
 17  
 18  
 19  
 20  
 21  
 22  
 23 **Table 1.** Characteristics of study participants.\*

| Characteristic                    | All<br>47,667    | Women<br>23,931 (50.6%) | Men<br>23,736 (49.4%) |
|-----------------------------------|------------------|-------------------------|-----------------------|
| Median age (IQR), years           | 45 (33-58)       | 46 (33-59)              | 44 (32-57)            |
| Ethnicity, n (%)                  |                  |                         |                       |
| Mexican American                  | 8,416 (8.3)      | 4,204 (7.7)             | 4,212 (9.0)           |
| European American                 | 19,691 (67.2)    | 9,710 (67.0)            | 9,981 (67.5)          |
| African American                  | 10,673 (11.2)    | 5,417 (12.0)            | 5,256 (10.4)          |
| Other/multi-racial                | 8,887 (13.3)     | 4,600 (13.4)            | 3,928 (13.1)          |
| Body weight (SD), kg              | 82.6 (21.3)      | 76.3 (20.5)             | 89.0 (20.1)           |
| Mean height (SD), cm              | 168.9 (10.0)     | 162.1 (6.9)             | 175.9 (7.5)           |
| Mean waist circumference (SD), cm | 98.5 (16.5)      | 95.9 (16.9)             | 101.2 (15.6)          |
| Mean BMI (SD), kg/m <sup>2</sup>  | 28.9 (6.8)       | 29.0 (7.5)              | 28.7 (5.9)            |
| Mean RFM (SD), %                  | 34.9 (8.5)       | 41.2 (6.0)              | 28.4 (5.3)            |
| RFM-defined obesity, % (95% CI) † | 50.1 (48.9-50.8) | 59.4 (58.4-60.5)        | 40.6 (39.4-41.8)      |
| BMI-defined obesity, % (95% CI) ‡ | 36.2 (35.4-37.1) | 37.8 (36.8-38.7)        | 34.6 (33.5-35.8)      |
| Abdominal obesity, % (95% CI) §   | 54.0 (53.0-55.0) | 63.8 (62.8-64.9)        | 43.9 (42.7-45.1)      |

\* Sample size represents unweighted data. Estimates represent weighted data.

BMI, body mass index; CI, confidence interval; IQR, interquartile range; RFM, relative fat mass; SD, standard deviation.

† Defined as an RFM  $\geq 40\%$  for women and  $\geq 30\%$  for men. RFM was calculated as follows:  $64 - (20 \times \text{height/waist circumference}) + (12 \times \text{sex})$ ; sex equals 0 for men and 1 for women; height and waist circumference measured in the same units. Estimates are not adjusted for age.

‡ Defined as a BMI  $\geq 30$  kg/m<sup>2</sup>. BMI was calculated as the body weight in kilograms divided by the square of the height in meters. Estimates are not adjusted for age.

§ Defined as a waist circumference  $>88$  cm for women and  $>102$  cm for men, according to the recommendations of the National Cholesterol Education Program (NCEP) Expert Panel on Detection, Evaluation, and Treatment of High Blood Cholesterol in Adults (Adult Treatment Panel III). Estimates are not adjusted for age.

9  
 10  
 11 The characteristics of the population with missing data are shown in Supplementary Table 2.

### 1 Obesity prevalence and temporal trends

2 Our findings indicate a higher proportion of individuals with obesity when RFM was used instead  
 3 of BMI. The overall age-adjusted prevalence of RFM-defined obesity increased from 42.4%  
 4 (95% confidence interval, 38.3% to 46.4%) in 1999-2000 to 55.4% (53.0% to 57.9%) in 2017-  
 5 March 2020. The corresponding BMI-defined obesity prevalence increased from 30.4% (26.7%  
 6 to 34.0%) to 42.1% (39.4% to 44.8%). We found a linear increase in the overall prevalence of  
 7 obesity during the study period using either RFM ( $P<0.001$ ;  $P=0.38$  for non-linearity) or BMI  
 8 ( $P<0.001$ ;  $P=0.55$  for non-linearity).

### 9 Obesity prevalence and temporal trends by sex

10 We observed a consistently higher prevalence of RFM-defined obesity in women compared with  
 11 men across years. In contrast, this difference was not consistent for BMI-defined obesity (Figure  
 12 1). In 2017-March 2020, the prevalence of RFM-defined obesity was significantly higher in  
 13 women than in men ( $P<0.001$ ). In contrast, the prevalence of BMI-defined obesity was similar in  
 14 women and men ( $P=0.97$ ). Among women, the prevalence of RFM-defined obesity increased  
 15 from 50.8% (46.2% to 55.3%) in 1999-2000 to 64.7% (62.1% to 67.3%) in 2017-March 2020, a  
 16 linear increase of 13.9 percentage points (9.0% to 18.9%;  $P<0.001$ ). For comparison, the  
 17 prevalence of BMI-defined obesity in women was 42.2% (39.4% to 45.0%) in 2017-March 2020,  
 18 a linear increase of 8.3 percentage points (3.5-13.2%;  $P<0.001$ ) (Table 2).

**Table 2.** Age-adjusted U.S. adult prevalence temporal trends in RFM-defined obesity by sex: 1999-2000 through 2017-March 2020.\*

|                                    | RFM-defined obesity | BMI-defined obesity |
|------------------------------------|---------------------|---------------------|
| <b>All participants (n=47,667)</b> |                     |                     |
| Prevalence, % (95% CI)             |                     |                     |
| 1999-2000                          | 42.4 (38.3-46.4)    | 30.4 (26.7-34)      |

|                         |                        |                  |                  |
|-------------------------|------------------------|------------------|------------------|
|                         | 2001-2002              | 42.5 (41.1-43.9) | 30.0 (27.6-32.4) |
|                         | 2003-2004              | 46.9 (44.7-49.2) | 32.1 (29.3-34.9) |
|                         | 2005-2006              | 47.1 (43.7-50.5) | 34.3 (31.1-37.4) |
|                         | 2007-2008              | 47.7 (45.0-50.5) | 33.7 (31.5-36.0) |
|                         | 2009-2010              | 48.5 (46.1-50.8) | 35.7 (33.6-37.8) |
|                         | 2011-2012              | 49.8 (46.6-53.0) | 35.4 (32.5-38.3) |
|                         | 2013-2014              | 51.3 (48.7-53.8) | 37.8 (35.6-40)   |
|                         | 2015-2016              | 53.7 (49.3-58.0) | 40.0 (36.4-43.6) |
|                         | 2017-2020              | 55.4 (53.0-57.9) | 42.1 (39.4-44.8) |
|                         | Prevalence change†     | 13.0 (8.5-17.5)  | 11.8 (7.4-16.1)  |
|                         | P for non-linearity‡   | 0.38             | 0.55             |
|                         | P value for trend‡     | <0.001           | <0.001           |
| <b>Women (n=23,931)</b> |                        |                  |                  |
|                         | Prevalence, % (95% CI) |                  |                  |
|                         | 1999-2000              | 50.8 (46.2-55.3) | 33.9 (29.6-38.1) |
|                         | 2001-2002              | 51.6 (49.2-53.9) | 32.9 (29.7-36.0) |
|                         | 2003-2004              | 55.3 (51.2-59.3) | 33.5 (29.7-37.2) |
|                         | 2005-2006              | 53.9 (50.4-57.4) | 34.8 (31.5-38.1) |
|                         | 2007-2008              | 56.4 (53.5-59.3) | 35.4 (32.7-38.0) |
|                         | 2009-2010              | 58.1 (55.3-60.8) | 36.0 (34.0-37.9) |
|                         | 2011-2012              | 60.8 (56.8-63.6) | 36.9 (33.4-40.5) |
|                         | 2013-2014              | 61.3 (57.9-64.7) | 40.0 (36.8-43.2) |
|                         | 2015-2016              | 64.4 (60.2-68.6) | 41.7 (38.1-45.3) |
|                         | 2017-2020              | 64.7 (62.1-67.3) | 42.2 (39.4-45.0) |
|                         | Prevalence change†     | 13.9 (9.0-18.9)  | 8.3 (3.5-13.2)   |
|                         | P for non-linearity§   | 0.10             | 0.39             |
|                         | P value for trend§     | <0.001           | <0.001           |
| <b>Men (n=23,736)</b>   |                        |                  |                  |
|                         | Prevalence, % (95% CI) |                  |                  |
|                         | 1999-2000              | 33.9 (29.9-37.8) | 27.0 (23.5-30.4) |
|                         | 2001-2002              | 33.1 (30.6-35.5) | 27.0 (24.8-29.2) |
|                         | 2003-2004              | 38.4 (35.9-40.8) | 30.7 (27.6-33.9) |
|                         | 2005-2006              | 40.2 (35.9-44.4) | 33.5 (29.3-37.8) |
|                         | 2007-2008              | 38.8 (35.6-42.0) | 32.1 (29.3-34.8) |
|                         | 2009-2010              | 38.7 (35.2-42.2) | 35.3 (31.4-39.2) |
|                         | 2011-2012              | 39.2 (35.9-42.5) | 33.8 (30.7-36.9) |
|                         | 2013-2014              | 41.2 (38.7-43.7) | 35.6 (33.2-38.1) |
|                         | 2015-2016              | 42.7 (37.7-47.7) | 38.2 (33.3-43.2) |
|                         | 2017-2020              | 45.8 (42.0-49.7) | 42.0 (37.8-46.3) |
|                         | Prevalence change†     | 12.0 (6.6-17.3)  | 15.1 (9.8-20.4)  |
|                         | P for non-linearity§   | 0.82             | 0.84             |
|                         | P value for trend§     | <0.001           | <0.001           |

\* Prevalence estimates represent weighted data. The relative fat mass (RFM) was calculated as follows:  $RFM = 64 - (20 \times \text{height/waist circumference}) + (12 \times \text{sex})$ ; sex equals 0 for men and 1 for women. Obesity was diagnosed if RFM was 40% or higher for women and RFM was 30% or higher for men. CI denotes confidence interval.

† Absolute difference (prevalence in 2017-2020 minus the prevalence in 1999-2000).

‡ Adjusted for age, sex, and ethnicity.

§ Adjusted for age and ethnicity.

1  
2  
3  
4

1  
2  
3 1 Among men, the prevalence of RFM-defined obesity increased from 33.9% (29.9% to 37.8%) in  
4  
5 2 1999-2000 to 45.8% (42.0% to 49.7%) in 2017-March 2020, a linear increase of 12.0  
6  
7 3 percentage points (6.6% to 17.3%;  $P<0.001$ ). The prevalence of BMI-defined obesity in men  
8  
9 4 was 42.0% (37.8% to 46.3%) in 2017-March 2020, a linear increase of 15.1 percentage points  
10  
11 5 (9.8% to 20.4%).  
12  
13

#### 14 6 Obesity prevalence and temporal trends by ethnicity

15  
16  
17 7 The highest prevalence of RFM-defined obesity across years was observed among Mexican  
18  
19 8 Americans. In contrast, the highest prevalence of BMI-defined obesity was observed among  
20  
21 9 African American women but not men (Figure 2). In 2017-March 2020, the prevalence of RFM-  
22  
23 10 defined obesity was significantly higher in Mexican Americans compared with African Americans  
24  
25 11 (Bonferroni corrected  $P<0.001$ ) or European Americans ( $P<0.001$ ). BMI-defined obesity  
26  
27 12 prevalence was similar in Mexican and African Americans ( $P=0.99$ ) and both groups had a  
28  
29 13 higher prevalence than European Americans ( $P=0.003$  and  $P=0.001$ , respectively).  
30  
31

32  
33 14 The largest increase in the prevalence of RFM-defined obesity from 1999-2000 to 2017-March  
34  
35 15 2020 occurred in Mexican American men, with a linear increase of 18.3 percentage points  
36  
37 16 (12.0% to 24.5%;  $P<0.001$ ) (Supplementary Table 3 and Figure 2). The highest increase in the  
38  
39 17 prevalence of BMI-defined obesity also occurred in Mexican American men, with a linear  
40  
41 18 increase of 21.2 percentage points (15.3% to 27.1%;  $P<0.001$ ) (Supplementary Table 3 and  
42  
43 19 Figure 2).  
44  
45

#### 46 20 Obesity prevalence and temporal trends by age group

47  
48  
49 21 In women and men, the highest prevalence of RFM-defined obesity across years was observed  
50  
51 22 in older adults (60-79 years) (Figure 3 and Supplementary Table 4).  
52  
53  
54 23

1  
2  
3 1 In contrast, no differences were observed in the prevalence of obesity between individuals 60-  
4  
5 2 79 years and 40-59 years when using BMI for the diagnosis of obesity (Figure 3). In 2017-March  
6  
7 3 2020, the prevalence of RFM-defined obesity was significantly higher in individuals 60-79 years  
8  
9 4 compared with those 40-59 years (Bonferroni corrected  $P < 0.001$ ) or 20-39 years ( $P < 0.001$ ). We  
10  
11 5 found no statistically significant differences in the prevalence of BMI-defined obesity across age  
12  
13 6 groups ( $P > 0.17$  for all comparisons).

14  
15  
16 7 Although our analysis by age showed an increased prevalence of obesity in older women and  
17  
18 8 men (Figure 3), we performed a sensitivity analysis to specifically explore the possible role of  
19  
20 9 menopause. Our findings from this post hoc analysis revealed that the crude prevalence of  
21  
22 10 RFM-defined obesity in 2017-2020 was 56.4% (95% CI, 53.5-59.3%) among premenopausal  
23  
24 11 women ( $n=1,935$ ) and 76.4% (71.0-81.8%) among postmenopausal women ( $n=1,406$ ). The  
25  
26 12 mean age at last menstrual period was 49 years in this population. For comparison, among  
27  
28 13 men, the corresponding prevalence of obesity was 39.7% (34.9-44.6%) in those younger than  
29  
30 14 50 years ( $n=1,790$ ) and 56.2% (52.9-59.5%) in men 50 years of age and older ( $n=1,886$ ).

## 1 DISCUSSION

2 Our study shows that, compared with BMI, the use of a surrogate for whole-body fat percentage  
3 revealed a much higher prevalence of general obesity among adults in the U.S., particularly  
4 among women, affecting nearly two-thirds of all women and nearly half of all men in 2017-2020,  
5 with an overall prevalence of 55.4%. This is an additional 22.5% of women and 3.8% of men 20-  
6 79 years being defined as obese compared with a BMI-based definition with the current criteria.

7 The use of RFM also revealed that the highest prevalence of general obesity over the study  
8 period from 1999 to 2020 occurred among Mexican Americans and not among African  
9 Americans, as was observed when BMI was used to diagnose obesity. Likewise, the use of  
10 RFM showed that the highest prevalence of general obesity over this study period occurred  
11 among older adults (60-79 years) and not among adults 40-59 years, as was observed when  
12 BMI was used. The higher prevalence of obesity in older individuals does not appear to be fully  
13 explained by a loss of skeletal muscle with age, since absolute fat mass also increases with  
14 age, although mainly visceral fat<sup>41 42</sup>. However, it is difficult to draw a firm conclusion from  
15 cross-sectional data. Our findings are consistent with those from other studies also showing a  
16 higher body fat percentage in older individuals<sup>12 23 41 43-46</sup>.

17 Overall, women had a markedly higher prevalence of RFM-defined obesity across years than  
18 men, a difference that was less evident when using BMI. Previous studies have shown no  
19 differences in the prevalence of BMI-defined obesity between women and men<sup>3 4 47</sup>. In the  
20 present study, the difference in the prevalence of RFM-defined obesity for 2017-2020 between  
21 women and men was nearly 20 percentage points.

22 The highest prevalence of RFM-defined obesity was observed in Mexican Americans, and the  
23 increase was linear over the study period, albeit this linear increase was largely driven by a  
24 steady increase among men. Among Mexican American women, a decrease was observed

1 since 2015. A previous study reported that, between 2003 and 2006, the prevalence of BMI-  
2 defined obesity was higher among African Americans compared with Mexican Americans, but  
3 between 2015 and 2018, Mexican American men had a higher prevalence than African  
4 American men<sup>29</sup>. In contrast, RFM revealed a consistently higher prevalence of general obesity  
5 among Mexican Americans over the observed time, in both women and men. Socio-economic  
6 characteristics are probably the main determinants of differences in the prevalence of general  
7 obesity between ethnic groups<sup>48</sup>.

8 It has been argued that the fat mass index (FMI, body fat mass adjusted for the square of the  
9 height, expressed in kg/m<sup>2</sup>) should be used as a reference of fat mass instead of body fat  
10 percentage (body fat mass adjusted for body weight) to avoid including fat mass both in the  
11 numerator and the denominator, as this is not mathematically advisable<sup>49</sup>. However, the  
12 concept of obesity (excess body fat) and all different forms to express it, for example BMI<sup>6 50 51</sup>,  
13 FMI<sup>52 53</sup>, fat mass/fat-free-mass<sup>54 55</sup>, body fat percentage<sup>12 56</sup>, to cite a few, should not be seen  
14 only as mathematical constructs but also as biological variables with important implications as  
15 risk factors for disease and mortality. In the present study, we chose body fat percentage as the  
16 reference because numerous studies have shown that body fat percentage is associated with  
17 mortality<sup>13-20 57</sup>. What is also important to note is that FMI does not appear to be superior to  
18 body fat percentage or BMI as a predictor of cardiovascular mortality<sup>14</sup>, all-cause mortality<sup>58 59</sup>  
19 or cardiovascular risk factors<sup>60</sup>. Because of its association with mortality, body fat percentage is  
20 of great clinical relevance. Recent studies support the utility of RFM to predict type 2 diabetes<sup>61</sup>  
21 and heart failure<sup>62</sup>.

22 Further research is needed to better understand the clinical implications of our study findings: 1)  
23 the much higher prevalence of general obesity among women when RFM is used as opposed to  
24 BMI; 2) the higher burden of general obesity on Mexican Americans compared with African and  
25 European Americans; and 3) the higher prevalence of general obesity in older individuals.



1  
2  
3 1 It is difficult to establish whether the higher prevalence of general obesity estimated using RFM  
4  
5 2 would translate into a higher risk of cardiovascular disease (CVD). The association between  
6  
7 3 obesity and CVD is very complex and several factors may mediate this association <sup>63</sup>. Although  
8  
9 4 subcutaneous fat appears to have a relative protective effect against CVD <sup>64</sup>, others have  
10  
11 5 shown that subcutaneous fat is also associated with cardiovascular risk factors, although less  
12  
13 6 strongly than visceral fat <sup>65</sup>. A major limitation of these studies, however, is that the analyses  
14  
15 7 involved a small region of the abdominal trunk.

16  
17  
18 8 In women, who biologically have a higher body adiposity than men, the possible protective  
19  
20 9 effect of estrogens on metabolism could be attenuated by the high prevalence of RFM-defined  
21  
22 10 obesity. This could help explain for example the very similar relative increase in the U.S.  
23  
24 11 prevalence of diabetes in women and men from 1999 to 2019 (by ~74%) ([www.healthdata.org](http://www.healthdata.org))  
25  
26 12 or the similar prevalence of diabetes in women (14.1% [11.8-16.7%]) and men (15.4% [13.5-  
27  
28 13 17.5%]) in 2017-2020 <sup>66</sup>. Our findings, although cross-sectional, do not appear to support a  
29  
30 14 protective role of estrogens against obesity *per se*.

31  
32  
33  
34 15 The temporal trends in RFM- and BMI-defined obesity in both women and men follow a parallel  
35  
36 16 pattern. However, stratified analysis by ethnicity showed some differences. RFM revealed that  
37  
38 17 Mexican Americans have a higher prevalence of obesity than European or African Americans.  
39  
40 18 Although we cannot establish causality, this finding coincides with the higher absolute increase  
41  
42 19 in the prevalence of diabetes and liver disease observed in Mexican Americans from 1999 to  
43  
44 20 2018 compared with European and African Americans <sup>67</sup>.

45  
46  
47 21 Whether the increased whole-body fat percentage in older individuals confers a higher risk on  
48  
49 22 mortality also requires further investigation as age *per se* is a strong risk factor for mortality <sup>68</sup>,  
50  
51 23 and the relationship between obesity and mortality could be mediated by age <sup>69</sup>. In addition, this  
52  
53 24 can be confounded by concomitant severe disease. For instance, several studies have shown  
54  
55 25 an inverse association between body fat percentage (but also BMI and FMI) and mortality in

1  
2  
3 1 older patients<sup>59 70 71</sup>. Conversely, the high body fat percentage in older individuals could explain  
4  
5 2 the association of BMI-defined obesity with diabetes and cardiovascular disease in older  
6  
7 3 individuals<sup>72-75</sup>. The increase in body adiposity with aging coincides with the high prevalence of  
8  
9 4 many cardiometabolic alterations occurring more often in older individuals, such as glucose  
10  
11 5 intolerance, insulin resistance, dyslipidemia, and hypertension<sup>69</sup>. BMI did not detect a higher  
12  
13 6 prevalence of general obesity in individuals aged 60 years and older compared with younger  
14  
15 7 adults, unlike when RFM was used. These findings further support that notion that BMI is a poor  
16  
17 8 predictor of morbidity and mortality in older individuals<sup>46 76</sup>.

19  
20  
21 9 Abdominal obesity and general obesity are overall underestimated when using BMI (Table 1  
22  
23 10 and Supplementary Table 1). It is also important to mention that the prevalence of abdominal  
24  
25 11 obesity is overall higher compared with the prevalence of RFM-defined obesity, except among  
26  
27 12 Mexican Americans (Supplementary Table 1). However, the closer proportions of abdominal  
28  
29 13 obesity and RFM-defined general obesity is expected. Since RFM is based on waist  
30  
31 14 circumference, and waist circumference is a surrogate for intra-abdominal fat<sup>77 78</sup>, RFM could  
32  
33 15 be a surrogate for both general obesity and abdominal obesity. Although RFM has been shown  
34  
35 16 to predict trunk fat percentage, the prediction error is greater for trunk fat percentage than for  
36  
37 17 whole-body fat percentage<sup>23</sup>.

38  
39  
40 18 Our study has strengths. First, we used a previously validated surrogate for whole-body fat  
41  
42 19 percentage in adults in the U.S.<sup>23</sup>, which has a high diagnostic accuracy (91%) for DXA-defined  
43  
44 20 obesity<sup>27</sup> and has been shown to result in lower total misclassification of DXA-defined high  
45  
46 21 body adiposity compared with BMI among women (RFM: 12.7%; BMI: 56.5%) and men (RFM:  
47  
48 22 9.4% BMI: 13.0%)<sup>23</sup>. Second, to define general obesity, we used previously validated RFM  
49  
50 23 cutoffs to predict all-cause mortality in a large U.S. adult population<sup>27</sup>. Previously proposed  
51  
52 24 cutoffs for fat-defined obesity have been based on arbitrary values<sup>79 80</sup> or on corresponding BMI  
53  
54 25 cutoffs<sup>12</sup>. Third, we used measured anthropometrics. RFM requires only waist circumference

1 and height for its calculation, which allowed us to estimate the prevalence of general obesity in  
2 a large adult population of the U.S. (n=44,754) with a wide age range, over a period of nearly 22  
3 years. Fourth, NHANES have used a consistent methodology across survey cycles to measure  
4 anthropometrics, reducing the risk of measurement error that could affect our results.

5 Our study also has limitations. First, RFM was developed and validated using DXA as the  
6 reference method. However, DXA is an indirect method to assess body fatness and is  
7 susceptible to bias introduced mainly by age, degree of fatness, and disease<sup>81 82</sup>. Thus, there  
8 are limitations to the level of accuracy and precision that RFM can perform. Nevertheless, RFM  
9 is an attempt to provide a relatively easy and affordable alternative method to BMI to better  
10 assess body fatness. Second, although the overall obesity misclassification has been reported  
11 to be lower with RFM than with BMI in American (21) and Korean individuals (20), another  
12 limitation is that the proportion of obesity misclassification is not trivial when using RFM. Third,  
13 our analysis was performed using data from a representative sample of the non-institutionalized  
14 U.S. population only. Fourth, our estimates of prevalence trends could have been affected by  
15 some variability in sampling across NHANES survey cycles<sup>35</sup>. Finally, we did not analyze the  
16 prevalence trends for Asian Americans during the period studied because NHANES began  
17 oversampling Asian Americans only from 2011-2012 onwards and RFM cutoffs used to  
18 diagnose general obesity have not been validated among Asian populations.

19 From a public health perspective, we argue that due to the underdiagnosis of obesity when  
20 using BMI, the most affected populations are not receiving adequate medical care that they  
21 require. Aspects that will need further research are the implications of some possible  
22 overdiagnosis of obesity<sup>83</sup> and the stigma that would be associated with it<sup>84</sup>.

23 In conclusion, the use of RFM, a surrogate for whole-body fat percentage, revealed a much  
24 higher prevalence of general obesity in the U.S. from 1999 to 2020, particularly among women,  
25 than that estimated by BMI. RFM, but not BMI, also revealed a disproportionate higher

1  
2  
3  
4  
5  
6  
7  
8  
9  
10  
11  
12  
13  
14  
15  
16  
17  
18  
19  
20  
21  
22  
23  
24  
25  
26  
27  
28  
29  
30  
31  
32  
33  
34  
35  
36  
37  
38  
39  
40  
41  
42  
43  
44  
45  
46  
47  
48  
49  
50  
51  
52  
53  
54  
55  
56  
57  
58  
59  
60

1 prevalence of general obesity in adults aged 60 years and older and Mexican Americans. Using  
2 BMI as the lone measure to define obesity may lead to significant misclassification of large  
3 obese subpopulations as non-obese, particularly among women. Our findings may have  
4 implications for the use of resources in public health to tackle obesity-related health problems in  
5 the most affected populations.

For peer review only

## 1       2       3       4       5       6       7       8       9       10       11       12       13       14       15       16       17       18       19       20       21       22       23       24       25       26       27       28       29       30       31       32       33       34       35       36       37       38       39       40       41       42       43       44       45       46       47       48       49       50       51       52       53       54       55       56       57       58       59       60

### 1       **ETHICS APPROVAL**

2       Since this study used publicly available de-identified data, approval from an Institutional Review  
3       Board was not required, as indicated in the Federal Policy for the Protection of Human Subjects  
4       (detailed in 45 CFR part 46) 35.

### 6       **DATA AVAILABILITY STATEMENT**

7       All data utilized are publicly and freely available from the NHANES website at  
8       <https://wwwn.cdc.gov/nchs/nhanes/>

### 10       **ACKNOWLEDGMENTS**

11       We thank the Centers for Disease Control and Prevention (CDC) and the National Center for  
12       Health Statistics (NCHS) for providing access to the NHANES datasets. We also thank all  
13       subjects who participated in the surveys from 1999 through 2020.

## 1 **AUTHOR CONTRIBUTIONS**

2 OOW was responsible for the conception and design of the study. OOW contributed to the  
3 statistical analysis. OOW and TS contributed to the interpretation of data and critical revision of  
4 the manuscript. OOW and TS drafted the final version of the manuscript and agreed to the  
5 submitted version of the manuscript. OOW is the manuscript's guarantor. OOW accepts full  
6 responsibility for the work and the conduct of the study, had access to the data, and controlled  
7 the decision to submit for publication.

## 8 **FUNDING**

9 This research received no specific grant from any funding agency in the public, commercial or  
10 not-for-profit sectors.

## 11 **COMPETING INTERESTS**

12 OOW is the lead author of the original article describing the development and validation of RFM.  
13 OOW currently works as an editor for The Lancet group. TS declares no conflict of interest.

## 14 **TRANSPARENCY STATEMENT**

15 OW (the manuscript's guarantor) affirms that the manuscript is an honest, accurate, and  
16 transparent account of the study being reported; that no important aspects of the study have  
17 been omitted; and that any discrepancies from the study as originally planned have been  
18 explained.

## 19 **PATIENT AND PUBLIC INVOLVEMENT**

20 Patients and the public were not involved in this study. This study will be available to the public  
21 once it is published in the scientific literature.

1  
2  
3  
4  
5  
6  
7  
8  
9  
10  
11  
12  
13  
14  
15  
16  
17  
18  
19  
20  
21  
22  
23  
24  
25  
26  
27  
28  
29  
30  
31  
32  
33  
34  
35  
36  
37  
38  
39  
40  
41  
42  
43  
44  
45  
46  
47  
48  
49  
50  
51  
52  
53  
54  
55  
56  
57  
58  
59  
60  
**1 REFERENCES**

1. Flegal KM, Carroll MD, Ogden CL, et al. Prevalence and trends in obesity among US adults, 1999-2000. *JAMA* 2002;288(14):1723-7. doi: 10.1001/jama.288.14.1723
2. Flegal KM, Kruszon-Moran D, Carroll MD, et al. Trends in Obesity Among Adults in the United States, 2005 to 2014. *JAMA* 2016;315(21):2284-91. doi: 10.1001/jama.2016.6458
3. Hales CM, Carroll MD, Fryar CD, et al. Prevalence of obesity and severe obesity among adults: United States, 2017-2018. *NCHS Data Brief* 2020(360):1-8.
4. Stierman B, Afful J, Carroll MD, et al. National Health and Nutrition Examination Survey 2017–March 2020 pre-pandemic data files - Development of files and prevalence estimates for selected health outcomes. *National Health Statistics Reports* 2021(158):1-20.
5. Rothman KJ. BMI-related errors in the measurement of obesity. *Int J Obes (Lond)* 2008;32 Suppl 3:S56-9. doi: 10.1038/ijo.2008.87
6. WHO. Physical status: the use and interpretation of anthropometry. WHO Technical Report Series. Geneva, 1995.
7. CDC. Defining adult overweight & obesity. Available at: <https://www.cdc.gov/obesity/basics/adult-defining.html>. Accessed April 18, 2022.
8. Garn SM, Leonard WR, Hawthorne VM. Three limitations of the body mass index. *Am J Clin Nutr* 1986;44(6):996-7. doi: 10.1093/ajcn/44.6.996
9. Gallagher D, Visser M, Sepulveda D, et al. How useful is body mass index for comparison of body fatness across age, sex, and ethnic groups? *Am J Epidemiol* 1996;143(3):228-39.
10. Romero-Corral A, Montori VM, Somers VK, et al. Association of bodyweight with total mortality and with cardiovascular events in coronary artery disease: a systematic review of cohort studies. *Lancet* 2006;368(9536):666-78. doi: 10.1016/S0140-6736(06)69251-9
11. Okorodudu DO, Jumean MF, Montori VM, et al. Diagnostic performance of body mass index to identify obesity as defined by body adiposity: a systematic review and meta-analysis. *Int J Obes (Lond)* 2010;34(5):791-9. doi: 10.1038/ijo.2010.5
12. Gallagher D, Heymsfield SB, Heo M, et al. Healthy percentage body fat ranges: an approach for developing guidelines based on body mass index. *Am J Clin Nutr* 2000;72(3):694-701.
13. Heitmann BL, Erikson H, Ellsinger BM, et al. Mortality associated with body fat, fat-free mass and body mass index among 60-year-old Swedish men—a 22-year follow-up. The study of men born in 1913. *Int J Obes Relat Metab Disord* 2000;24(1):33-7.
14. Ortega FB, Sui X, Lavie CJ, et al. Body Mass Index, the most widely used but also widely criticized index: Would a criterion standard measure of total body fat be a better predictor of cardiovascular disease mortality? *Mayo Clin Proc* 2016;91(4):443-55.
15. Padwal R, Leslie WD, Lix LM, et al. Relationship Among Body Fat Percentage, Body Mass Index, and All-Cause Mortality: A Cohort Study. *Ann Intern Med* 2016;164(8):532-41.
16. Zong G, Zhang Z, Yang Q, et al. Total and regional adiposity measured by dual-energy X-ray absorptiometry and mortality in NHANES 1999-2006. *Obesity (Silver Spring)* 2016;24(11):2414-21. doi: 10.1002/oby.21659
17. Dong B, Peng Y, Wang Z, et al. Joint association between body fat and its distribution with all-cause mortality: A data linkage cohort study based on NHANES (1988-2011). *PLoS One* 2018;13(2):e0193368. doi: 10.1371/journal.pone.0193368
18. Lahmann PH, Lissner L, Gullberg B, et al. A prospective study of adiposity and all-cause mortality: the Malmo Diet and Cancer Study. *Obes Res* 2002;10(5):361-9. doi: 10.1038/oby.2002.50

- 1  
2  
3 1 19. Jenkins DA, Bowden J, Robinson HA, et al. Adiposity-mortality relationships in type 2 diabetes,  
4 2 coronary heart disease, and cancer subgroups in the UK Biobank, and their modification by smoking.  
5 3 *Diabetes Care* 2018;41(9):1878-86. doi: 10.2337/dc17-2508  
6 4  
7 4 20. Jayedi A, Khan TA, Aune D, et al. Body fat and risk of all-cause mortality: a systematic review and  
8 5 dose-response meta-analysis of prospective cohort studies. *Int J Obes (Lond)* 2022;46(9):1573-81. doi:  
9 6 10.1038/s41366-022-01165-5  
10 7  
11 7 21. Nuttall FQ. Body Mass Index: Obesity, BMI, and Health: A Critical Review. *Nutr Today*  
12 8 2015;50(3):117-28. doi: 10.1097/NT.000000000000092  
13 9  
14 9 22. CDC. Body mass index : considerations for practitioners. <https://stacks.cdc.gov/view/cdc/25368>  
15 10 [Accessed December 8, 2021].  
16 11  
17 11 23. Woolcott OO, Bergman RN. Relative fat mass (RFM) as a new estimator of whole-body fat  
18 12 percentage – A cross-sectional study in American adult individuals. *Sci Rep* 2018;8(1):10980. doi:  
19 13 doi.org/10.1038/s41598-018-29362-1  
20 14  
21 14 24. Paek JK, Kim J, Kim K, et al. Usefulness of relative fat mass in estimating body adiposity in Korean  
22 15 adult population. *Endocr J* 2019;66(8):723-29. doi: 10.1507/endocrj.EJ19-0064  
23 16  
24 16 25. Guzman-Leon AE, Velarde AG, Vidal-Salas M, et al. External validation of the relative fat mass (RFM)  
25 17 index in adults from north-west Mexico using different reference methods. *PLoS One*  
26 18 2019;14(12):e0226767. doi: 10.1371/journal.pone.0226767  
27 19  
28 19 26. Correa CR, Formolo NPS, Dezanetti T, et al. Relative fat mass is a better tool to diagnose high  
29 20 adiposity when compared to body mass index in young male adults: A cross-section study. *Clin Nutr*  
30 21 *ESPEN* 2021;41:225-33. doi: 10.1016/j.clnesp.2020.12.009  
31 22  
32 22 27. Woolcott OO, Bergman RN. Defining cutoffs to diagnose obesity using the relative fat mass (RFM):  
33 23 Association with mortality in NHANES 1999-2014. *Int J Obes (Lond)* 2020;44:1301-10. doi:  
34 24 10.1038/s41366-019-0516-8  
35 25  
36 25 28. Liu B, Du Y, Wu Y, et al. Trends in obesity and adiposity measures by race or ethnicity among adults  
37 26 in the United States 2011-18: population based study. *BMJ* 2021;372:n365. doi: 10.1136/bmj.n365  
38 27  
39 27 29. Gupta RD, Chakraborty PA, Al Kibria GM. Racial/Ethnic disparities in prevalence and trends of  
40 28 obesity, grade 3 obesity, and abdominal obesity among US adults, 2003-18. *Obesity Medicine* 2021;28  
41 29 (no pagination)(100372) doi: <https://dx.doi.org/10.1016/j.obmed.2021.100372>  
42 30  
43 30 30. CDC. NHANES 2017-March 2020 pre-pandemic data release notes.  
44 31 <https://www.cdc.gov/nchs/nhanes/continuousnhanes/releasenotes.aspx?Cycle=2017-2020> [Accessed  
45 32 October 10, 2022].  
46 33  
47 33 31. Day JC. Population Projections of the United States by Age, Sex, Race, and Hispanic Origin: 1995 to  
48 34 2050, U.S. Bureau of the Census, Current Population Reports. Reports, P25-1130, U.S. Washington, DC,  
49 35 1996.  
50 36  
51 36 32. National Health and Nutrition Examination Survey (NHANES). Anthropometry procedures manual.  
52 37 [http://www.cdc.gov/nchs/data/nhanes/nhanes\\_07\\_08/manual\\_an.pdf](http://www.cdc.gov/nchs/data/nhanes/nhanes_07_08/manual_an.pdf) [Accessed May 16, 2016].  
53 38  
54 38 33. CDC. NHANES response rates and population totals. Available at:  
55 39 <https://www.cdc.gov/nchs/nhanes/responserates.aspx>. Accessed July 19, 2022.  
56 40  
57 40 34. HHS. U.S. Department of Health & Human Services. Federal policy for the protection of human  
58 41 subjects. <https://www.hhs.gov/ohrp/regulations-and-policy/regulations/common-rule/index.html>.  
59 42 Accessed April 2, 2022., 2020.  
60 43  
61 43 35. Johnson CL, Paulose-Ram R, Ogden CL, et al. National health and nutrition examination survey:  
62 44 analytic guidelines, 1999-2010. *Vital Health Stat* 2 2013(161):1-24.  
63 45  
64 45 36. CDC. National Health and Nutrition Examination Survey. Module 1: Datasets and Documentation.  
65 46 <https://www.cdc.gov/nchs/nhanes/tutorials/module1.aspx> [accessed July 18, 2022].  
66 47  
67 47 37. Appiah D, Nwabuo CC, Ebong IA, et al. Trends in age at natural menopause and reproductive life  
68 48 span among US women, 1959-2018. *JAMA* 2021;325(13):1328-30. doi: 10.1001/jama.2021.0278  
69 49  
70 49



- 1  
2  
3 1 38. Durrleman S, Simon R. Flexible regression models with cubic splines. *Stat Med* 1989;8(5):551-61. doi:  
4 2 10.1002/sim.4780080504  
5 3 39. Harrell FE. Regression modeling strategies: With applications to linear models, logistic regression,  
6 4 and survival analysis. New York: Springer 2001.  
7 5 40. Cox NJ. Speaking Stata: Smoothing in various directions. *Stata Journal* 2005;5(4):574-93.  
8 6 41. Novak LP. Aging, total body potassium, fat-free mass, and cell mass in males and females between  
9 7 ages 18 and 85 years. *J Gerontol* 1972;27(4):438-43. doi: 10.1093/geronj/27.4.438  
10 8 42. Song M-Y, Ruts E, Kim J, et al. Sarcopenia and increased adipose tissue infiltration of muscle in  
11 9 elderly African American women. *Am J Clin Nutr* 2004;79(5):874-80.  
12 10 43. Deurenberg P, Weststrate JA, Seidell JC. Body mass index as a measure of body fatness: age- and  
13 11 sex-specific prediction formulas. *Br J Nutr* 1991;65(2):105-14.  
14 12 44. Noppa H, Andersson M, Bengtsson C, et al. Body composition in middle-aged women with special  
15 13 reference to the correlation between body fat mass and anthropometric data. *Am J Clin Nutr*  
16 14 1979;32(7):1388-95.  
17 15 45. Jensky-Squires NE, Dieli-Conwright CM, Rossuello A, et al. Validity and reliability of body composition  
18 16 analysers in children and adults. *Br J Nutr* 2008;100(4):859-65. doi: 10.1017/S0007114508925460  
19 17 46. Kuk JL, Saunders TJ, Davidson LE, et al. Age-related changes in total and regional fat distribution.  
20 18 *Ageing Res Rev* 2009;8(4):339-48. doi: 10.1016/j.arr.2009.06.001  
21 19 47. Flegal KM, Carroll MD, Kit BK, et al. Prevalence of obesity and trends in the distribution of body mass  
22 20 index among US adults, 1999-2010. *JAMA* 2012;307(5):491-7.  
23 21 48. Lakerveld J, Mackenbach J. The upstream determinants of adult obesity. *Obes Facts* 2017;10(3):216-  
24 22 22. doi: 10.1159/000471489  
25 23 49. Wells JC. Toward body composition reference data for infants, children, and adolescents. *Adv Nutr*  
26 24 2014;5(3):320S-9S. doi: 10.3945/an.113.005371  
27 25 50. Powell-Wiley TM, Poirier P, Burke LE, et al. Obesity and cardiovascular disease: A scientific statement  
28 26 from the American Heart Association. *Circulation* 2021;143(21):e984-e1010. doi:  
29 27 10.1161/CIR.0000000000000973  
30 28 51. Quetelet L. A Treatise on Man and the Development of his Faculties. Cambridge: Cambridge  
31 29 University Press 2013.  
32 30 52. VanItallie TB, Yang MU, Heymsfield SB, et al. Height-normalized indices of the body's fat-free mass  
33 31 and fat mass: potentially useful indicators of nutritional status. *Am J Clin Nutr* 1990;52(6):953-9. doi:  
34 32 10.1093/ajcn/52.6.953  
35 33 53. Kyle UG, Schutz Y, Dupertuis YM, et al. Body composition interpretation. Contributions of the fat-  
36 34 free mass index and the body fat mass index. *Nutrition* 2003;19(7-8):597-604. doi: 10.1016/s0899-  
37 35 9007(03)00061-3  
38 36 54. Goran MI, Allison DB, Poehlman ET. Issues relating to normalization of body fat content in men and  
39 37 women. *Int J Obes Relat Metab Disord* 1995;19(9):638-43.  
40 38 55. Prado CM, Wells JC, Smith SR, et al. Sarcopenic obesity: A Critical appraisal of the current evidence.  
41 39 *Clin Nutr* 2012;31(5):583-601. doi: 10.1016/j.clnu.2012.06.010  
42 40 56. Deurenberg P, Yap M, van Staveren WA. Body mass index and percent body fat: a meta analysis  
43 41 among different ethnic groups. *Int J Obes Relat Metab Disord* 1998;22(12):1164-71.  
44 42 57. Parra-Soto S, Cowley ES, Rezende LFM, et al. Associations of six adiposity-related markers with  
45 43 incidence and mortality from 24 cancers—findings from the UK Biobank prospective cohort study. *BMC*  
46 44 *Med* 2021;19(1):7. doi: 10.1186/s12916-020-01848-8  
47 45 58. Auyeung TW, Lee JS, Leung J, et al. Survival in older men may benefit from being slightly overweight  
48 46 and centrally obese—a 5-year follow-up study in 4,000 older adults using DXA. *J Gerontol A Biol Sci Med*  
49 47 *Sci* 2010;65(1):99-104. doi: 10.1093/gerona/glp099

- 1  
2  
3 1 59. Rolland Y, Gallini A, Cristini C, et al. Body-composition predictors of mortality in women aged  $\geq 75$   
4 2 y: data from a large population-based cohort study with a 17-y follow-up. *Am J Clin Nutr*  
5 3 2014;100(5):1352-60. doi: 10.3945/ajcn.114.086728  
6 4 60. Jeong SM, Lee DH, Rezende LFM, et al. Different correlation of body mass index with body fatness  
7 5 and obesity-related biomarker according to age, sex and race-ethnicity. *Sci Rep* 2023;13(1):3472. doi:  
8 6 10.1038/s41598-023-30527-w  
9 7 61. Suthahar N, Wang K, Zwartkruis VW, et al. Associations of relative fat mass, a new index of adiposity,  
10 8 with type-2 diabetes in the general population. *Eur J Intern Med* 2023;109:73-78. doi:  
11 9 10.1016/j.ejim.2022.12.024  
12 10 62. Suthahar N, Meems LMG, Withaar C, et al. Relative fat mass, a new index of adiposity, is strongly  
13 11 associated with incident heart failure: data from PREVEND. *Scientific Reports* 2022;12(1):147. doi:  
14 12 10.1038/s41598-021-02409-6  
15 13 63. Tutor AW, Lavie CJ, Kachur S, et al. Updates on obesity and the obesity paradox in cardiovascular  
16 14 diseases. *Prog Cardiovasc Dis* 2022 doi: 10.1016/j.pcad.2022.11.013  
17 15 64. Porter SA, Massaro JM, Hoffmann U, et al. Abdominal subcutaneous adipose tissue: a protective fat  
18 16 depot? *Diabetes Care* 2009;32(6):1068-75. doi: 10.2337/dc08-2280  
19 17 65. Fox CS, Massaro JM, Hoffmann U, et al. Abdominal visceral and subcutaneous adipose tissue  
20 18 compartments: association with metabolic risk factors in the Framingham Heart Study. *Circulation*  
21 19 2007;116(1):39-48. doi: 10.1161/CIRCULATIONAHA.106.675355  
22 20 66. CDC. National Diabetes Statistics Report. Estimates of diabetes and its burden in the United States.  
23 21 <https://www.cdc.gov/diabetes/data/statistics-report/index.html> [Accessed April 2, 2023].  
24 22 67. Caraballo C, Herrin J, Mahajan S, et al. Temporal trends in racial and ethnic disparities in  
25 23 multimorbidity prevalence in the United States, 1999-2018. *Am J Med* 2022;135(9):1083-92 e14. doi:  
26 24 10.1016/j.amjmed.2022.04.010  
27 25 68. Tian YE, Cropley V, Maier AB, et al. Heterogeneous aging across multiple organ systems and  
28 26 prediction of chronic disease and mortality. *Nat Med* 2023 doi: 10.1038/s41591-023-02296-6  
29 27 69. Schwartz RS. Obesity in the elderly: Prevalence, consequences, and treatment. In: Bray GA, Bouchard  
30 28 C, eds. Handbook of obesity Etiology and pathophysiology. Second edition ed. New York: Marcel Dekker,  
31 29 Inc. 2004:135-48.  
32 30 70. de Santana FM, Domiciano DS, Goncalves MA, et al. Association of appendicular lean mass, and  
33 31 subcutaneous and visceral adipose tissue with mortality in older Brazilians: The Sao Paulo Ageing &  
34 32 Health Study. *J Bone Miner Res* 2019;34(7):1264-74. doi: 10.1002/jbmr.3710  
35 33 71. Lee JS, Auyeung TW, Kwok T, et al. Survival benefit of abdominal adiposity: a 6-year follow-up study  
36 34 with Dual X-ray absorptiometry in 3,978 older adults. *Age (Dordr)* 2012;34(3):597-608. doi:  
37 35 10.1007/s11357-011-9272-y  
38 36 72. Chen Y, Zhang XP, Yuan J, et al. Association of body mass index and age with incident diabetes in  
39 37 Chinese adults: a population-based cohort study. *BMJ Open* 2018;8(9):e021768. doi: 10.1136/bmjopen-  
40 38 2018-021768  
41 39 73. Lind L, Sundstrom J, Arnlov J, et al. Impact of aging on the strength of cardiovascular risk factors: A  
42 40 longitudinal study over 40 years. *J Am Heart Assoc* 2018;7(1) doi: 10.1161/JAHA.117.007061  
43 41 74. Masaki KH, Curb JD, Chiu D, et al. Association of body mass index with blood pressure in elderly  
44 42 Japanese American men. The Honolulu Heart Program. *Hypertension* 1997;29(2):673-7. doi:  
45 43 10.1161/01.hyp.29.2.673  
46 44 75. Tromp J, Paniagua SMA, Lau ES, et al. Age dependent associations of risk factors with heart failure:  
47 45 pooled population based cohort study. *BMJ* 2021;372:n461. doi: 10.1136/bmj.n461  
48 46 76. Chang SH, Beason TS, Hunleth JM, et al. A systematic review of body fat distribution and mortality in  
49 47 older people. *Maturitas* 2012;72(3):175-91. doi: 10.1016/j.maturitas.2012.04.004 [published Online  
50 48 First: 2012/05/19]

- 1  
2  
3 1 77. Edston E. A correlation between the weight of visceral adipose tissue and selected anthropometric  
4 2 indices: an autopsy study. *Clin Obes* 2013;3(3-4):84-9. doi: 10.1111/cob.12021  
5 3  
6 3 78. Conway JM, Chanetsa FF, Wang P. Intraabdominal adipose tissue and anthropometric surrogates in  
7 4 African American women with upper- and lower-body obesity. *Am J Clin Nutr* 1997;66(6):1345-51. doi:  
8 5 10.1093/ajcn/66.6.1345  
9 6 79. Lee CD, Blair SN, Jackson AS. Cardiorespiratory fitness, body composition, and all-cause and  
10 7 cardiovascular disease mortality in men. *Am J Clin Nutr* 1999;69(3):373-80. doi: 10.1093/ajcn/69.3.373  
11 8 80. Lobman TG, Houtkooper L, Going SB. Body Fat Measurement Goes High-Tech: Not All Are Created  
12 9 Equal. *ACSM's Health & Fitness Journal* 1997;1(1):30-35.  
13 10 81. Wells JC, Fewtrell MS. Measuring body composition. *Arch Dis Child* 2006;91(7):612-7. doi:  
14 11 10.1136/adc.2005.085522  
15 12 82. Clasey JL, Kanaley JA, Wideman L, et al. Validity of methods of body composition assessment in  
16 13 young and older men and women. *J Appl Physiol (1985)* 1999;86(5):1728-38.  
17 14 83. Brodersen J, Schwartz LM, Heneghan C, et al. Overdiagnosis: what it is and what it isn't. *BMJ Evid  
18 15 Based Med* 2018;23(1):1-3. doi: 10.1136/ebmed-2017-110886  
19 16 84. Puhl RM, Heuer CA. Obesity stigma: important considerations for public health. *Am J Public Health*  
20 17 2010;100(6):1019-28. doi: 10.2105/AJPH.2009.159491  
21  
22  
23  
24  
25  
26  
27  
28  
29  
30  
31  
32  
33  
34  
35  
36  
37  
38  
39  
40  
41  
42  
43  
44  
45  
46  
47  
48  
49  
50  
51  
52  
53  
54  
55  
56  
57  
58  
59  
60

## 1 **FIGURE LEGENDS**

2 **Figure 1. Age-adjusted U.S. adult prevalence temporal trends in RFM-defined obesity by**  
3 **sex: 1999-2000 through 2017-March 2020.** Trend lines were smoothed using the Lowes  
4 method on weighted prevalence estimates. Body fat-defined obesity was determined using the  
5 relative fat mass (RFM). RFM was calculated as follows:  $RFM = 64 - (20 \times \text{height/waist}$   
6  $\text{circumference}) + (12 \times \text{sex})$ ; sex equals 0 for men and 1 for women. Obesity was diagnosed if  
7 RFM was 40% or higher for women and RFM was 30% or higher for men.

8 **Figure 2. Age-adjusted U.S. adult prevalence temporal trends in RFM-defined obesity by**  
9 **ethnicity: 1999-2000 through 2017-March 2020.** Trend lines were smoothed using the Lowes  
10 method on weighted prevalence estimates. The relative fat mass (RFM) was calculated as  
11 follows:  $RFM = 64 - (20 \times \text{height/waist circumference}) + (12 \times \text{sex})$ ; sex equals 0 for men and 1  
12 for women. Obesity was diagnosed if RFM was 40% or higher for women and RFM was 30% or  
13 higher for men.

14 **Figure 3. Age-adjusted U.S. adult prevalence temporal trends in RFM-defined obesity by**  
15 **age group: 1999-2000 through 2017-March 2020.** Trend lines were smoothed using the  
16 Lowes method on weighted prevalence estimates. The relative fat mass (RFM) was calculated  
17 as follows:  $RFM = 64 - (20 \times \text{height/waist circumference}) + (12 \times \text{sex})$ ; sex equals 0 for men  
18 and 1 for women. Obesity was diagnosed if RFM was 40% or higher for women and RFM was  
19 30% or higher for men.

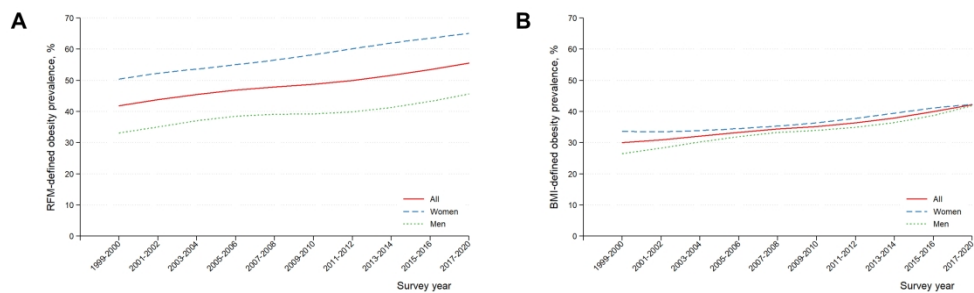

Figure 1. Age-adjusted U.S. adult prevalence trends in RFM-defined obesity by sex: 1999-2000 through 2017-March 2020.

762x228mm (96 x 96 DPI)



Figure 2. Age-adjusted U.S. adult prevalence trends in RFM-defined obesity by ethnicity: 1999-2000 through 2017-March 2020.

762x711mm (96 x 96 DPI)

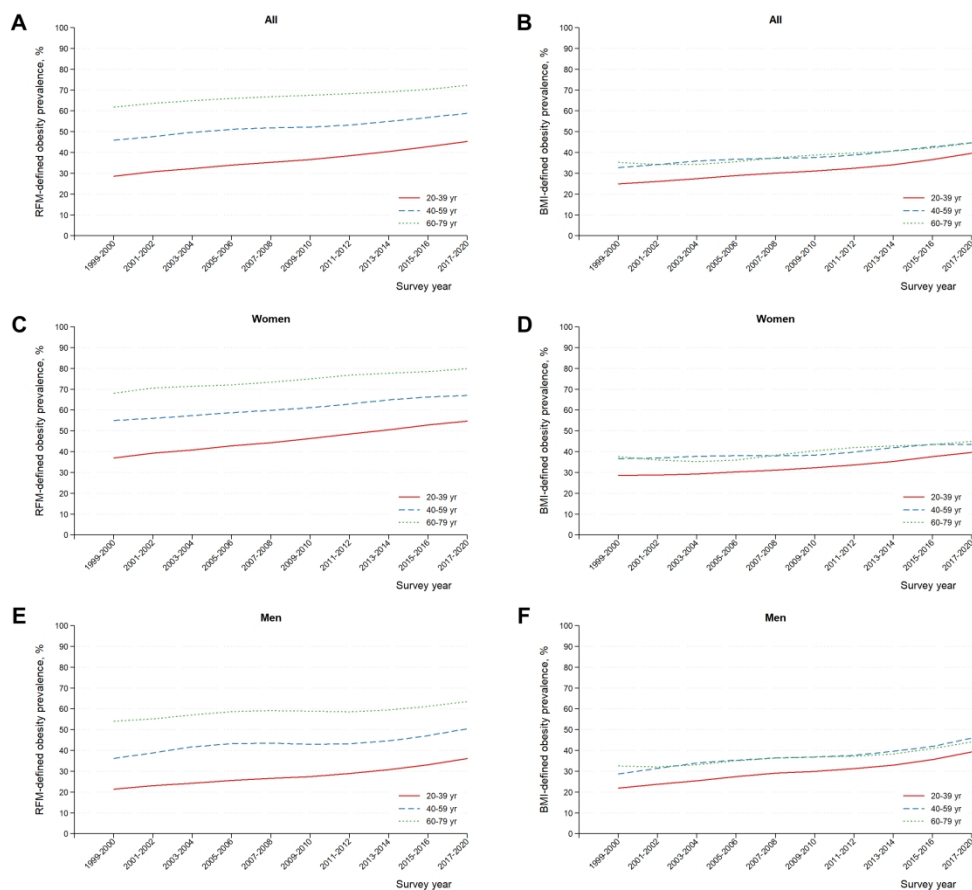

Figure 3. Age-adjusted U.S. adult prevalence trends in RFM-defined obesity by age group: 1999-2000 through 2017-March 2020.

762x711mm (96 x 96 DPI)

## Supplementary Material

### Temporal trends in obesity defined by the relative fat mass (RFM) index among adults in the United States from 1999 to 2020: population-based study

Orison O. Woolcott<sup>1,2,\*</sup>, Till Seuring<sup>3</sup>

*<sup>1</sup>Ronin Institute, Montclair, NJ, USA; <sup>2</sup>Institute for Globally Distributed Open Research and Education (IGDORE), Los Angeles, CA, USA; <sup>3</sup>Luxembourg Institute of Socio-Economic Research (LISER), Esch-sur-Alzette, Luxembourg*



**Supplementary Table 1.** Prevalence of general and abdominal obesity among study participants by sex and ethnicity.\*

|                                   | <b>Mexican American</b> | <b>European American</b> | <b>African American</b> |
|-----------------------------------|-------------------------|--------------------------|-------------------------|
| <b>Women</b>                      | n=4,204                 | n=9,710                  | n=5,417                 |
| RFM-defined obesity, % (95% CI) † | 72.7 (70.3-75.1)        | 56.6 (55.2-58.0)         | 69.9 (68.3-71.4)        |
| BMI-defined obesity, % (95% CI) ‡ | 45.5 (43.2-47.9)        | 35.4 (34.0-36.7)         | 54.5 (52.9-56.1)        |
| Abdominal obesity, % (95% CI) §   | 71.5 (69.2-73.8)        | 62.8 (61.4-64.1)         | 75.0 (73.6-76.3)        |
| <b>Men</b>                        | n=4,212                 | n=9,981                  | n=5,256                 |
| RFM-defined obesity, % (95% CI) † | 47.0 (44.9-49.1)        | 41.7 (40.3-43.2)         | 33.7 (32.1-35.3)        |
| BMI-defined obesity, % (95% CI) ‡ | 38.4 (36.3-40.4)        | 35.0 (33.6-36.5)         | 35.9 (34.2-37.6)        |
| Abdominal obesity, % (95% CI) §   | 41.2 (39.1-43.2)        | 47.6 (46.2-49.1)         | 37.5 (35.9-39.0)        |

\* Sample size represents unweighted data. Estimates represent weighted data.

BMI, body mass index; CI, confidence interval IQR, interquartile range; RFM, relative fat mass; SD, standard deviation.

† Defined as an RFM  $\geq 40\%$  for women and  $\geq 30\%$  for men. Estimates are not adjusted for age.

‡ Defined as a BMI  $\geq 30$  kg/m<sup>2</sup>. Estimates are not adjusted for age.

§ Defined as a waist circumference  $>88$  cm for women and  $>102$  cm for men, according to the recommendations of the National Cholesterol Education Program (NCEP) Expert Panel on Detection, Evaluation, and Treatment of High Blood Cholesterol in Adults (Adult Treatment Panel III). Estimates are not adjusted for age.

**Supplementary Table 2.** Characteristics of study participants with missing data.\*

| Characteristic          | All†          | With complete data | With missing data |
|-------------------------|---------------|--------------------|-------------------|
| Sample size, n (%)      | 50,283 (100)  | 47,667 (95.6)      | 2,616 (4.4)       |
| Median age (IQR), years | 45 (33-58)    | 45 (33-58)         | 47 (34-63)        |
| Male sex, n (%)         | 24,954 (49.2) | 23,736 (49.4)      | 1,218 (45.4)      |
| Ethnicity, n (%)        |               |                    |                   |
| Mexican American        | 8,827 (8.3)   | 8,416 (8.3)        | 411 (8.6)         |
| European American       | 20,618 (66.9) | 19,691 (67.2)      | 927 (58.6)        |
| African American        | 11,433 (11.4) | 10,673 (11.2)      | 760 (16.7)        |
| Other/multi-racial      | 9,405 (13.4)  | 8,887 (13.2)       | 518 (16.1)        |

\* Sample size represents unweighted data. Estimates represent weighted data.  
† This group includes participants with complete data and participants with missing data on body weight (n=666), height (n=596), or waist circumference (n=2,340).

**Supplementary Table 3.** Age-adjusted U.S. adult prevalence temporal trends in RFM-defined obesity by ethnicity: 1999-2000 through 2017-March 2020.\*

|                         | RFM-defined obesity |                   |                  | BMI-defined obesity |                   |                  |
|-------------------------|---------------------|-------------------|------------------|---------------------|-------------------|------------------|
|                         | Mexican American    | European American | African American | Mexican American    | European American | African American |
| <b>All participants</b> | n=8,416             | n=19,691          | n=10,673         | n=8,416             | n=19,691          | n=10,673         |
| Prevalence, % (95% CI)  |                     |                   |                  |                     |                   |                  |
| 1999-2000               | 53.1 (48.5-57.7)    | 39.4 (34.2-44.6)  | 48.3 (45.0-51.7) | 34.7 (28.9-40.6)    | 28.3 (23.9-32.7)  | 39.8 (35.7-43.8) |
| 2001-2002               | 52.1 (47.1-57.1)    | 41.0 (38.9-43.1)  | 46.0 (42.9-49.0) | 30.7 (26.7-34.7)    | 29.8 (27.0-32.6)  | 38.3 (34.4-42.3) |
| 2003-2004               | 60.1 (55.2-65.0)    | 44.8 (41.0-48.6)  | 52.7 (49.4-56.0) | 36.9 (32.2-41.6)    | 30.6 (27.7-33.4)  | 45.1 (39.7-50.5) |
| 2005-2006               | 55.4 (51.8-58.9)    | 44.9 (40.7-49.2)  | 51.5 (47.9-55.1) | 33.8 (31.2-36.4)    | 33.1 (29.2-36.9)  | 45.9 (42.3-49.5) |
| 2007-2008               | 62.2 (56.2-68.2)    | 45.7 (41.5-49.9)  | 52.5 (49.1-56.0) | 39.9 (33.8-46.1)    | 32.4 (28.7-36.0)  | 43.7 (39.2-48.1) |
| 2009-2010               | 61.5 (59.4-63.6)    | 46.4 (43.0-49.8)  | 56.8 (51.8-61.8) | 40.5 (36.7-44.4)    | 34.2 (31.1-37.2)  | 49.4 (44.2-54.5) |
| 2011-2012               | 63.6 (58.6-68.6)    | 46.8 (42.8-50.9)  | 57.4 (54.8-60.0) | 46.1 (41.3-50.8)    | 33.0 (29.4-36.5)  | 48.4 (44.6-52.3) |
| 2013-2014               | 65.0 (61.2-68.9)    | 49.4 (46.6-52.3)  | 55.0 (50.0-59.9) | 46.1 (41.0-51.2)    | 36.6 (33.6-39.5)  | 47.9 (43.7-52.0) |
| 2015-2016               | 70.3 (67.0-73.5)    | 51.2 (46.9-55.4)  | 56.6 (52.0-61.2) | 48.7 (44.3-53.1)    | 38.5 (34.5-42.5)  | 48.7 (43.8-53.5) |
| 2017-2020               | 68.8 (64.5-73.1)    | 54.1 (50.8-57.4)  | 57.1 (54.4-59.8) | 50.2 (46.8-53.5)    | 41.7 (37.7-45.6)  | 49.9 (47.2-52.6) |
| Prevalence change†      | 15.7 (9.6-21.7)     | 14.7 (8.8-20.5)   | 8.7 (4.6-12.9)   | 15.4 (9.0-21.9)     | 13.4 (7.7-19)     | 10.2 (5.5-14.8)  |
| P for non-linearity‡    | 0.58                | 0.97              | 0.25             | 0.52                | 0.10              | 0.35             |
| P value for trend‡      | <0.001              | <0.001            | <0.001           | <0.001              | <0.001            | <0.001           |
| <b>Women</b>            | n=4,204             | n=9,710           | n=5,417          | n=4,204             | n=9,710           | n=5,417          |
| Prevalence, % (95% CI)  |                     |                   |                  |                     |                   |                  |
| 1999-2000               | 62.8 (55.1-70.5)    | 46.2 (40.2-52.1)  | 64.2 (59.6-68.8) | 39.8 (31.1-48.5)    | 30.3 (25.2-35.3)  | 49.2 (42.5-56.0) |
| 2001-2002               | 66.4 (58.6-74.3)    | 47.8 (44.2-51.4)  | 64.2 (59.0-69.4) | 37.0 (30.2-43.8)    | 31.1 (27.6-34.7)  | 48.7 (42.8-54.7) |
| 2003-2004               | 75.0 (68.3-81.6)    | 50.6 (43.9-57.2)  | 70.7 (65.5-75.8) | 42.7 (36.0-49.3)    | 30.3 (25.7-34.8)  | 53.9 (46.3-61.5) |
| 2005-2006               | 72.0 (66.4-77.5)    | 49.9 (45.6-54.2)  | 66.2 (60.9-71.5) | 41.3 (34.8-47.7)    | 32.8 (28.3-37.3)  | 52.7 (48.5-56.9) |
| 2007-2008               | 74.8 (71.2-78.4)    | 52.3 (47.5-57.2)  | 67.9 (63.2-72.6) | 44.7 (38.8-50.6)    | 32.8 (28.7-36.9)  | 49.2 (45.2-53.3) |
| 2009-2010               | 77.8 (74.8-80.9)    | 53.4 (49.5-57.2)  | 74.6 (68.6-80.7) | 45.7 (42.0-49.3)    | 32.1 (29.0-35.3)  | 58.5 (52.0-64.9) |
| 2011-2012               | 74.6 (66.2-83.0)    | 56.3 (51.4-61.3)  | 74.9 (72.1-77.8) | 49.0 (40.4-57.5)    | 33.3 (28.0-38.7)  | 57.9 (53.5-62.3) |
| 2013-2014               | 81.2 (74.7-87.6)    | 57.3 (53.4-61.2)  | 72.5 (68.8-76.2) | 51.7 (45.2-58.3)    | 37.6 (33.7-41.6)  | 56.7 (53.1-60.3) |
| 2015-2016               | 84.6 (79.7-89.5)    | 60.0 (56.2-63.8)  | 72.3 (68.3-76.4) | 52.2 (48.4-56.1)    | 38.5 (34.0-43.0)  | 57.1 (52.6-61.5) |
| 2017-2020               | 76.9 (70.8-83.1)    | 62.3 (59.0-65.7)  | 72.4 (68.6-76.2) | 49.6 (43.1-56.0)    | 40.3 (36.4-44.2)  | 57.3 (53.7-60.9) |
| Prevalence change†      | 14.1 (4.7-23.6)     | 16.2 (9.7-22.7)   | 8.3 (2.5-14.0)   | 9.8 (-0.6-20.1)     | 10.0 (3.9-16.1)   | 8.1 (0.8-15.4)   |

|                                                                                                                                                                                                                                                                                                                                                                                                                                                                                                                                         |                  |                  |                  |                  |                  |                  |
|-----------------------------------------------------------------------------------------------------------------------------------------------------------------------------------------------------------------------------------------------------------------------------------------------------------------------------------------------------------------------------------------------------------------------------------------------------------------------------------------------------------------------------------------|------------------|------------------|------------------|------------------|------------------|------------------|
| P for non-linearity§                                                                                                                                                                                                                                                                                                                                                                                                                                                                                                                    | 0.026            | 0.77             | 0.34             | 0.76             | 0.12             | 0.71             |
| P value for trend§                                                                                                                                                                                                                                                                                                                                                                                                                                                                                                                      |                  | <0.001           | <0.001           | <0.001           | <0.001           | <0.001           |
| <b>Men</b>                                                                                                                                                                                                                                                                                                                                                                                                                                                                                                                              | n=4,212          | n=9,981          | n=5,256          | n=4,212          | n=9,981          | n=5,256          |
| Prevalence, % (95% CI)                                                                                                                                                                                                                                                                                                                                                                                                                                                                                                                  |                  |                  |                  |                  |                  |                  |
| 1999-2000                                                                                                                                                                                                                                                                                                                                                                                                                                                                                                                               | 42.9 (39.4-46.5) | 33.2 (28.6-37.7) | 27.5 (23.1-31.9) | 29.1 (24.6-33.6) | 26.8 (22.9-30.6) | 26.8 (23.0-30.6) |
| 2001-2002                                                                                                                                                                                                                                                                                                                                                                                                                                                                                                                               | 40.6 (34.7-46.4) | 34.1 (30.9-37.4) | 25.8 (21.4-30.1) | 25.9 (21.9-29.9) | 28.3 (25.3-31.4) | 26.5 (22.8-30.1) |
| 2003-2004                                                                                                                                                                                                                                                                                                                                                                                                                                                                                                                               | 47.1 (39.3-54.8) | 38.9 (35.5-42.4) | 31.2 (27.2-35.2) | 31.7 (25.0-38.3) | 30.9 (27.0-34.7) | 34.2 (27.7-40.7) |
| 2005-2006                                                                                                                                                                                                                                                                                                                                                                                                                                                                                                                               | 40.8 (34.1-47.4) | 40.0 (35.1-44.9) | 34.1 (28.3-39.9) | 27.4 (22.7-32.1) | 33.3 (28.7-37.9) | 37.2 (31.2-43.2) |
| 2007-2008                                                                                                                                                                                                                                                                                                                                                                                                                                                                                                                               | 50.9 (43.3-58.4) | 38.8 (34.7-42.9) | 33.8 (28.8-38.9) | 35.1 (28.0-42.1) | 32.0 (27.9-36.0) | 36.9 (31.0-42.7) |
| 2009-2010                                                                                                                                                                                                                                                                                                                                                                                                                                                                                                                               | 47.8 (44.6-51.0) | 39.4 (34.6-44.3) | 35.4 (31.4-39.5) | 36.3 (30.9-41.6) | 36.1 (30.8-41.3) | 38.6 (33.1-44.0) |
| 2011-2012                                                                                                                                                                                                                                                                                                                                                                                                                                                                                                                               | 52.5 (45.6-59.4) | 37.6 (34.3-40.9) | 36.4 (32.3-40.5) | 42.7 (36.0-49.5) | 32.5 (29.7-35.3) | 37.5 (32.8-42.2) |
| 2013-2014                                                                                                                                                                                                                                                                                                                                                                                                                                                                                                                               | 52.4 (48.6-56.3) | 41.7 (38.1-45.3) | 35.2 (28.6-41.8) | 43.6 (38.2-49.1) | 35.6 (31.6-39.5) | 37.9 (32.5-43.4) |
| 2015-2016                                                                                                                                                                                                                                                                                                                                                                                                                                                                                                                               | 55.9 (50.9-60.8) | 42.3 (36.5-48.1) | 38.1 (31.9-44.2) | 45.3 (38.5-52.1) | 38.4 (32.5-44.3) | 38.9 (33.5-44.2) |
| 2017-2020                                                                                                                                                                                                                                                                                                                                                                                                                                                                                                                               | 61.2 (55.8-66.6) | 45.8 (40.3-51.2) | 39.1 (35.4-42.8) | 50.3 (46.1-54.5) | 43.1 (36.9-49.2) | 41.2 (36.7-45.7) |
| Prevalence change†                                                                                                                                                                                                                                                                                                                                                                                                                                                                                                                      | 18.3 (12.0-24.5) | 12.6 (5.7-19.5)  | 11.6 (6.1-17.1)  | 21.2 (15.3-27.1) | 16.3 (9.3-23.3)  | 14.4 (8.7-20.1)  |
| P for non-linearity§                                                                                                                                                                                                                                                                                                                                                                                                                                                                                                                    | 0.21             | 0.80             | 0.50             | 0.24             | 0.45             | 0.08             |
| P value for trend§                                                                                                                                                                                                                                                                                                                                                                                                                                                                                                                      | <0.001           | <0.001           | <0.001           | <0.001           | <0.001           | <0.001           |
| <p>* Prevalence estimates represent weighted data. The relative fat mass (RFM) was calculated as follows: <math>RFM = 64 - (20 \times \text{height/waist circumference}) + (12 \times \text{sex})</math>; sex equals 0 for men and 1 for women. Obesity was diagnosed if RFM was 40% or higher for women and RFM was 30% or higher for men. CI denotes confidence interval.</p> <p>† Absolute difference (prevalence in 2017-2020 minus the prevalence in 1999-2000).</p> <p>‡ Adjusted for age and sex.</p> <p>§ Adjusted for age.</p> |                  |                  |                  |                  |                  |                  |

**Supplementary Table 4.** Age-adjusted U.S. adult prevalence temporal trends in RFM-defined obesity by age group: 1999-2000 through 2017-March 2020.\*

|                         | RFM-defined obesity |                  |                  | BMI-defined obesity |                  |                  |
|-------------------------|---------------------|------------------|------------------|---------------------|------------------|------------------|
|                         | 20-39 years old     | 40-59 years old  | 60-79 years old  | 20-39 years old     | 40-59 years old  | 60-79 years old  |
| <b>All participants</b> | n=16,747            | n=16,912         | n=14,008         | n=16,747            | n=16,912         | n=14,008         |
| Prevalence, 95% CI      |                     |                  |                  |                     |                  |                  |
| 1999-2000               | 29.0 (24.5-33.6)    | 46.9 (40.5-53.4) | 61.8 (58.1-65.6) | 25.4 (21.5-29.3)    | 33.2 (26.9-39.4) | 35.4 (31.3-39.5) |
| 2001-2002               | 30.2 (27.2-33.1)    | 45.0 (42.2-47.8) | 63.8 (61.3-66.3) | 25.3 (22.4-28.1)    | 33.2 (29.9-36.4) | 33.7 (30.7-36.8) |
| 2003-2004               | 34.2 (31.2-37.1)    | 51.2 (47.8-54.6) | 65.8 (62.5-69.0) | 28.1 (24.6-31.7)    | 35.9 (32.1-39.7) | 33.0 (29.4-36.5) |
| 2005-2006               | 32.6 (28.7-36.5)    | 53.2 (47.9-58.5) | 66.0 (62.2-69.8) | 28.5 (24.1-32.9)    | 40.1 (35.6-44.6) | 34.9 (31.5-38.3) |
| 2007-2008               | 35.5 (31.1-39.9)    | 51.6 (48.5-54.7) | 66.1 (62.4-69.8) | 30.2 (26.2-34.3)    | 35.7 (32.4-39.1) | 37.4 (33.8-40.9) |
| 2009-2010               | 37.2 (32.8-41.6)    | 50.5 (47.7-53.4) | 68.5 (65.2-71.8) | 32.5 (28.7-36.3)    | 36.0 (33.9-38.2) | 41.8 (38.0-45.7) |
| 2011-2012               | 37.7 (33.1-42.3)    | 53.6 (49.9-57.3) | 68.0 (62.9-73.1) | 30.4 (26.2-34.5)    | 39.3 (36.1-42.5) | 38.3 (33.8-42.9) |
| 2013-2014               | 40.0 (36.2-43.9)    | 54.5 (50.3-58.7) | 68.8 (64.6-73.0) | 34.4 (31.3-37.5)    | 40.6 (36.2-45.1) | 39.3 (35.2-43.5) |
| 2015-2016               | 43.0 (39.0-47.0)    | 57.1 (50.6-63.6) | 69.8 (64.7-74.9) | 36.0 (32.2-39.8)    | 42.8 (37.5-48.2) | 42.8 (37.5-48.2) |
| 2017-2020               | 44.6 (40.5-48.6)    | 59.4 (56.2-62.7) | 70.6 (67.2-74.0) | 39.8 (35.6-44.0)    | 44.3 (41.2-47.4) | 42.7 (39.1-46.3) |
| Prevalence change†      | 15.5 (9.7-21.3)     | 12.5 (5.6-19.4)  | 8.8 (3.9-13.6)   | 14.5 (8.9-20.0)     | 11.2 (4.5-17.8)  | 7.3 (2.0-12.5)   |
| P for non-linearity‡    | 0.65                | 0.94             | 0.25             | 0.48                | 0.21             | 0.46             |
| P value for trend‡      | <0.001              | <0.001           | <0.001           | <0.001              | <0.001           | <0.001           |
| <b>Women</b>            | n=8,295             | n=8,684          | n=6,952          | n=8,295             | n=8,684          | n=6,952          |
| Prevalence, 95% CI      |                     |                  |                  |                     |                  |                  |
| 1999-2000               | 36.9 (30.9-42.9)    | 56.2 (48.9-63.5) | 67.7 (63.3-72.2) | 28.7 (23.6-33.7)    | 37.4 (30.2-44.5) | 37.4 (31.6-43.2) |
| 2001-2002               | 39.9 (35.3-44.5)    | 52.9 (48.1-57.6) | 72.0 (69.3-74.7) | 28.9 (24.1-33.6)    | 35.0 (30.2-39.8) | 36.6 (32.0-41.2) |
| 2003-2004               | 42.0 (35.8-48.2)    | 59.7 (54.9-64.5) | 73.0 (68.3-77.7) | 29.0 (23.8-34.1)    | 38.1 (32.3-43.9) | 33.6 (28.5-38.7) |
| 2005-2006               | 40.3 (35.3-45.4)    | 58.7 (53.5-63.8) | 71.3 (66.4-76.2) | 29.2 (24.1-34.3)    | 40.7 (35.9-45.6) | 34.8 (28.4-41.2) |
| 2007-2008               | 46.1 (40.4-51.7)    | 60.0 (56.2-63.8) | 69.8 (64.5-75.1) | 33.0 (27.3-38.6)    | 37.6 (32.6-42.5) | 36.0 (30.0-41.9) |
| 2009-2010               | 46.4 (40.6-52.2)    | 59.3 (55.5-63.1) | 78.5 (75.8-81.3) | 31.8 (28.2-35.4)    | 35.5 (31.7-39.3) | 45.1 (40.7-49.5) |
| 2011-2012               | 47.6 (42.1-53.1)    | 64.6 (60.1-69.0) | 76.7 (69.8-83.5) | 31.9 (28.0-35.9)    | 39.4 (35.1-43.6) | 42.1 (34.4-49.7) |
| 2013-2014               | 50.8 (46.6-55.1)    | 63.3 (58.1-68.5) | 78.0 (74.6-81.4) | 36.6 (33.9-39.3)    | 43.6 (38.2-48.9) | 40.2 (34.1-46.2) |
| 2015-2016               | 53.3 (48.9-57.8)    | 69.1 (62.7-75.5) | 77.1 (70.6-83.6) | 37.1 (33.5-40.7)    | 44.8 (38.4-51.1) | 45.0 (37.3-52.8) |
| 2017-2020               | 53.3 (48.5-58.0)    | 67.9 (63.6-72.3) | 81.0 (76.4-85.6) | 39.9 (35.3-44.4)    | 42.8 (38.9-46.7) | 45.4 (40.9-49.8) |

|                                                                                                                                                                                                                                                                                                                                                                                                                                                                                                                                                     |                  |                  |                  |                  |                  |                  |
|-----------------------------------------------------------------------------------------------------------------------------------------------------------------------------------------------------------------------------------------------------------------------------------------------------------------------------------------------------------------------------------------------------------------------------------------------------------------------------------------------------------------------------------------------------|------------------|------------------|------------------|------------------|------------------|------------------|
| Prevalence change†                                                                                                                                                                                                                                                                                                                                                                                                                                                                                                                                  | 16.4 (9.1-23.7)  | 11.7 (3.6-19.9)  | 13.3 (7.1-19.5)  | 11.2 (4.7-17.7)  | 5.5 (-2.3-13.2)  | 8.0 (1.0-15.0)   |
| P for non-linearity§                                                                                                                                                                                                                                                                                                                                                                                                                                                                                                                                | 0.16             | 0.39             | 0.99             | 0.44             | 0.42             | 0.97             |
| P value for trend§                                                                                                                                                                                                                                                                                                                                                                                                                                                                                                                                  | <0.001           | <0.001           | <0.001           | <0.001           | <0.001           | <0.001           |
| <b>Men</b>                                                                                                                                                                                                                                                                                                                                                                                                                                                                                                                                          | n=8,452          | n=8,228          | n=7,056          | n=8,452          | n=8,228          | n=7,056          |
| Prevalence, 95% CI                                                                                                                                                                                                                                                                                                                                                                                                                                                                                                                                  |                  |                  |                  |                  |                  |                  |
| 1999-2000                                                                                                                                                                                                                                                                                                                                                                                                                                                                                                                                           | 22.4 (18.0-26.8) | 36.8 (30.4-43.2) | 54.7 (49.9-59.5) | 22.7 (18.3-27.0) | 28.8 (22.8-34.8) | 33.2 (28.2-38.1) |
| 2001-2002                                                                                                                                                                                                                                                                                                                                                                                                                                                                                                                                           | 20.8 (17.4-24.1) | 37.1 (33.5-40.7) | 53.5 (49.8-57.1) | 21.7 (18.5-24.9) | 31.2 (28.0-34.5) | 30.4 (26.0-34.8) |
| 2003-2004                                                                                                                                                                                                                                                                                                                                                                                                                                                                                                                                           | 26.9 (23.3-30.4) | 42.3 (36.7-47.9) | 57.2 (52.5-62.0) | 27.4 (22.5-32.3) | 33.6 (28.4-38.9) | 32.3 (27.4-37.2) |
| 2005-2006                                                                                                                                                                                                                                                                                                                                                                                                                                                                                                                                           | 25.4 (20.1-30.7) | 47.4 (40.5-54.2) | 59.8 (54.8-64.7) | 27.6 (22.0-33.1) | 39.5 (33.1-45.9) | 34.7 (29.9-39.5) |
| 2007-2008                                                                                                                                                                                                                                                                                                                                                                                                                                                                                                                                           | 25.4 (21.2-29.5) | 42.8 (37.8-47.8) | 61.8 (57.7-65.9) | 27.6 (23.8-31.4) | 33.7 (28.8-38.5) | 39.2 (34.8-43.5) |
| 2009-2010                                                                                                                                                                                                                                                                                                                                                                                                                                                                                                                                           | 28.5 (23.6-33.3) | 41.6 (37.7-45.5) | 56.9 (51.1-62.7) | 33.2 (27.2-39.2) | 36.6 (33.0-40.2) | 37.5 (32.3-42.8) |
| 2011-2012                                                                                                                                                                                                                                                                                                                                                                                                                                                                                                                                           | 28.4 (23.9-33.0) | 42.3 (38.0-46.6) | 58.1 (52.1-64.2) | 28.9 (23.5-34.2) | 39.1 (35.6-42.5) | 34.2 (29.2-39.2) |
| 2013-2014                                                                                                                                                                                                                                                                                                                                                                                                                                                                                                                                           | 30.0 (25.5-34.5) | 45.5 (40.3-50.7) | 58.6 (51.6-65.5) | 32.5 (28.1-36.8) | 37.7 (32.2-43.3) | 38.6 (30.7-46.4) |
| 2015-2016                                                                                                                                                                                                                                                                                                                                                                                                                                                                                                                                           | 33.1 (28.3-38.0) | 44.5 (36.5-52.6) | 61.4 (55.4-67.5) | 35.0 (29.0-41.0) | 40.8 (34.6-47.1) | 40.2 (34.9-45.5) |
| 2017-2020                                                                                                                                                                                                                                                                                                                                                                                                                                                                                                                                           | 35.9 (30.2-41.5) | 50.8 (46.2-55.4) | 58.8 (54.3-63.3) | 39.5 (33.1-46.0) | 45.8 (41.1-50.6) | 39.7 (34.0-45.4) |
| Prevalence change†                                                                                                                                                                                                                                                                                                                                                                                                                                                                                                                                  | 13.4 (6.5-20.4)  | 14.0 (6.4-21.6)  | 4.1 (-2.3-10.5)  | 16.8 (9.3-24.4)  | 17.0 (9.7-24.4)  | 6.5 (-0.7-13.8)  |
| P for non-linearity§                                                                                                                                                                                                                                                                                                                                                                                                                                                                                                                                | 0.47             | 0.42             | 0.16             | 0.97             | 0.41             | 0.24             |
| P value for trend§                                                                                                                                                                                                                                                                                                                                                                                                                                                                                                                                  | <0.001           | <0.001           | <0.001           | <0.001           | <0.001           | <0.001           |
| <p>* Prevalence estimates represent weighted data. The relative fat mass (RFM) was calculated as follows: <math>RFM = 64 - (20 \times \text{height/waist circumference}) + (12 \times \text{sex})</math>; sex equals 0 for men and 1 for women. Obesity was diagnosed if RFM was 40% or higher for women and RFM was 30% or higher for men. CI denotes confidence interval.</p> <p>† Absolute difference (prevalence in 2017-2020 minus the prevalence in 1999-2000).</p> <p>‡ Adjusted for sex and ethnicity.</p> <p>§ Adjusted for ethnicity.</p> |                  |                  |                  |                  |                  |                  |

**NHANES 1999-March 2020****Supplementary Figure 1.** Selection of study participants.

1  
2  
3  
4  
5  
6  
7  
8  
9  
10  
11  
12  
13  
14  
15  
16  
17  
18  
19  
20  
21  
22  
23  
24  
25  
26  
27  
28  
29  
30  
31  
32  
33  
34  
35  
36  
37  
38  
39  
40  
41  
42  
43  
44  
45  
46  
47  
48  
49  
50  
51  
52  
53  
54  
55  
56  
57  
58  
59  
60

## STROBE Statement—checklist of items that should be included in reports of observational studies

|                              | Item No | Recommendation                                                                                                                                                                                                                                                                                                                                                                                                                                                         | Page No |
|------------------------------|---------|------------------------------------------------------------------------------------------------------------------------------------------------------------------------------------------------------------------------------------------------------------------------------------------------------------------------------------------------------------------------------------------------------------------------------------------------------------------------|---------|
| <b>Title and abstract</b>    | 1       | (a) Indicate the study's design with a commonly used term in the title or the abstract                                                                                                                                                                                                                                                                                                                                                                                 | 1       |
|                              |         | (b) Provide in the abstract an informative and balanced summary of what was done and what was found                                                                                                                                                                                                                                                                                                                                                                    | 3-4     |
| <b>Introduction</b>          |         |                                                                                                                                                                                                                                                                                                                                                                                                                                                                        |         |
| Background/rationale         | 2       | Explain the scientific background and rationale for the investigation being reported                                                                                                                                                                                                                                                                                                                                                                                   | 6-7     |
| Objectives                   | 3       | State specific objectives, including any prespecified hypotheses                                                                                                                                                                                                                                                                                                                                                                                                       | 7       |
| <b>Methods</b>               |         |                                                                                                                                                                                                                                                                                                                                                                                                                                                                        |         |
| Study design                 | 4       | Present key elements of study design early in the paper                                                                                                                                                                                                                                                                                                                                                                                                                | 8       |
| Setting                      | 5       | Describe the setting, locations, and relevant dates, including periods of recruitment, exposure, follow-up, and data collection                                                                                                                                                                                                                                                                                                                                        | 8       |
| Participants                 | 6       | (a) <i>Cohort study</i> —Give the eligibility criteria, and the sources and methods of selection of participants. Describe methods of follow-up<br><i>Case-control study</i> —Give the eligibility criteria, and the sources and methods of case ascertainment and control selection. Give the rationale for the choice of cases and controls<br><i>Cross-sectional study</i> —Give the eligibility criteria, and the sources and methods of selection of participants | 8, 10   |
|                              |         | (b) <i>Cohort study</i> —For matched studies, give matching criteria and number of exposed and unexposed<br><i>Case-control study</i> —For matched studies, give matching criteria and the number of controls per case                                                                                                                                                                                                                                                 | NA      |
| Variables                    | 7       | Clearly define all outcomes, exposures, predictors, potential confounders, and effect modifiers. Give diagnostic criteria, if applicable                                                                                                                                                                                                                                                                                                                               | 9-10    |
| Data sources/<br>measurement | 8*      | For each variable of interest, give sources of data and details of methods of assessment (measurement). Describe comparability of assessment methods if there is more than one group                                                                                                                                                                                                                                                                                   | 8-10    |
| Bias                         | 9       | Describe any efforts to address potential sources of bias                                                                                                                                                                                                                                                                                                                                                                                                              | 9-10    |
| Study size                   | 10      | Explain how the study size was arrived at                                                                                                                                                                                                                                                                                                                                                                                                                              | 8       |
| Quantitative variables       | 11      | Explain how quantitative variables were handled in the analyses. If applicable, describe which groupings were chosen and why                                                                                                                                                                                                                                                                                                                                           | 9-10    |
| Statistical methods          | 12      | (a) Describe all statistical methods, including those used to control for confounding                                                                                                                                                                                                                                                                                                                                                                                  | 9-10    |
|                              |         | (b) Describe any methods used to examine subgroups and interactions                                                                                                                                                                                                                                                                                                                                                                                                    | 9-10    |
|                              |         | (c) Explain how missing data were addressed                                                                                                                                                                                                                                                                                                                                                                                                                            | 8       |
|                              |         | (d) <i>Cohort study</i> —If applicable, explain how loss to follow-up was addressed<br><i>Case-control study</i> —If applicable, explain how matching of cases and controls was addressed<br><i>Cross-sectional study</i> —If applicable, describe analytical methods taking account of sampling strategy                                                                                                                                                              | 9-10    |
|                              |         | (e) Describe any sensitivity analyses                                                                                                                                                                                                                                                                                                                                                                                                                                  | 10      |

Continued on next page



| <b>Results</b>           |     |                                                                                                                                                                                                              |               |
|--------------------------|-----|--------------------------------------------------------------------------------------------------------------------------------------------------------------------------------------------------------------|---------------|
| Participants             | 13* | (a) Report numbers of individuals at each stage of study—eg numbers potentially eligible, examined for eligibility, confirmed eligible, included in the study, completing follow-up, and analysed            | 11            |
|                          |     | (b) Give reasons for non-participation at each stage                                                                                                                                                         | 11            |
|                          |     | (c) Consider use of a flow diagram                                                                                                                                                                           | Suppl Fig 1   |
| Descriptive data         | 14* | (a) Give characteristics of study participants (eg demographic, clinical, social) and information on exposures and potential confounders                                                                     | 11            |
|                          |     | (b) Indicate number of participants with missing data for each variable of interest                                                                                                                          | Suppl Table 1 |
|                          |     | (c) <i>Cohort study</i> —Summarise follow-up time (eg, average and total amount)                                                                                                                             | NA            |
| Outcome data             | 15* | <i>Cohort study</i> —Report numbers of outcome events or summary measures over time                                                                                                                          | NA            |
|                          |     | <i>Case-control study</i> —Report numbers in each exposure category, or summary measures of exposure                                                                                                         | NA            |
|                          |     | <i>Cross-sectional study</i> —Report numbers of outcome events or summary measures                                                                                                                           | 11-18         |
| Main results             | 16  | (a) Give unadjusted estimates and, if applicable, confounder-adjusted estimates and their precision (eg, 95% confidence interval). Make clear which confounders were adjusted for and why they were included | NA            |
|                          |     | (b) Report category boundaries when continuous variables were categorized                                                                                                                                    | 12-18         |
|                          |     | (c) If relevant, consider translating estimates of relative risk into absolute risk for a meaningful time period                                                                                             | NA            |
| Other analyses           | 17  | Report other analyses done—eg analyses of subgroups and interactions, and sensitivity analyses                                                                                                               | 11-18         |
| <b>Discussion</b>        |     |                                                                                                                                                                                                              |               |
| Key results              | 18  | Summarise key results with reference to study objectives                                                                                                                                                     | 19            |
| Limitations              | 19  | Discuss limitations of the study, taking into account sources of potential bias or imprecision. Discuss both direction and magnitude of any potential bias                                                   | 23-24         |
| Interpretation           | 20  | Give a cautious overall interpretation of results considering objectives, limitations, multiplicity of analyses, results from similar studies, and other relevant evidence                                   | 24            |
| Generalisability         | 21  | Discuss the generalisability (external validity) of the study results                                                                                                                                        | 24            |
| <b>Other information</b> |     |                                                                                                                                                                                                              |               |
| Funding                  | 22  | Give the source of funding and the role of the funders for the present study and, if applicable, for the original study on which the present article is based                                                | 26            |

\*Give information separately for cases and controls in case-control studies and, if applicable, for exposed and unexposed groups in cohort and cross-sectional studies.

**Note:** An Explanation and Elaboration article discusses each checklist item and gives methodological background and published examples of transparent reporting. The STROBE checklist is best used in conjunction with this article (freely available on the Web sites of PLoS Medicine at <http://www.plosmedicine.org/>, Annals of Internal Medicine at <http://www.annals.org/>, and Epidemiology at <http://www.epidem.com/>). Information on the STROBE Initiative is available at [www.strobe-statement.org](http://www.strobe-statement.org).

# BMJ Open

## Temporal trends in obesity defined by the relative fat mass (RFM) index among adults in the United States from 1999 to 2020: population-based study

|                                 |                                                                                                                                                                                      |
|---------------------------------|--------------------------------------------------------------------------------------------------------------------------------------------------------------------------------------|
| Journal:                        | <i>BMJ Open</i>                                                                                                                                                                      |
| Manuscript ID                   | bmjopen-2022-071295.R2                                                                                                                                                               |
| Article Type:                   | Original research                                                                                                                                                                    |
| Date Submitted by the Author:   | 06-Jul-2023                                                                                                                                                                          |
| Complete List of Authors:       | Woolcott, Orison; Ronin Institute; Institute for Globally Distributed Open Research and Education (IGDORE)<br>Seuring, Till; Luxembourg Institute of Socio-Economic Research (LISER) |
| <b>Primary Subject Heading</b>: | Epidemiology                                                                                                                                                                         |
| Secondary Subject Heading:      | Diabetes and endocrinology, General practice / Family practice, Public health                                                                                                        |
| Keywords:                       | EPIDEMIOLOGY, PUBLIC HEALTH, General endocrinology < DIABETES & ENDOCRINOLOGY, GENERAL MEDICINE (see Internal Medicine), Obesity                                                     |
|                                 |                                                                                                                                                                                      |

SCHOLARONE™  
Manuscripts



I, the Submitting Author has the right to grant and does grant on behalf of all authors of the Work (as defined in the below author licence), an exclusive licence and/or a non-exclusive licence for contributions from authors who are: i) UK Crown employees; ii) where BMJ has agreed a CC-BY licence shall apply, and/or iii) in accordance with the terms applicable for US Federal Government officers or employees acting as part of their official duties; on a worldwide, perpetual, irrevocable, royalty-free basis to BMJ Publishing Group Ltd ("BMJ") its licensees and where the relevant Journal is co-owned by BMJ to the co-owners of the Journal, to publish the Work in this journal and any other BMJ products and to exploit all rights, as set out in our [licence](#).

The Submitting Author accepts and understands that any supply made under these terms is made by BMJ to the Submitting Author unless you are acting as an employee on behalf of your employer or a postgraduate student of an affiliated institution which is paying any applicable article publishing charge ("APC") for Open Access articles. Where the Submitting Author wishes to make the Work available on an Open Access basis (and intends to pay the relevant APC), the terms of reuse of such Open Access shall be governed by a Creative Commons licence – details of these licences and which [Creative Commons](#) licence will apply to this Work are set out in our licence referred to above.

Other than as permitted in any relevant BMJ Author's Self Archiving Policies, I confirm this Work has not been accepted for publication elsewhere, is not being considered for publication elsewhere and does not duplicate material already published. I confirm all authors consent to publication of this Work and authorise the granting of this licence.

1  
2  
3 1 **Temporal trends in obesity defined by the relative fat mass (RFM) index among**  
4  
5 2 **adults in the United States from 1999 to 2020: population-based study**  
6  
7  
8 3  
9

10 4 Orison O. Woolcott, research scientist<sup>1,2,\*</sup>, Till Seuring, postdoctoral fellow<sup>3</sup>  
11  
12 5

13  
14 6 *<sup>1</sup>Ronin Institute, Montclair, NJ, USA; <sup>2</sup>Institute for Globally Distributed Open Research and*  
15  
16 7 *Education (IGDORE), Los Angeles, CA, USA; <sup>3</sup>Luxembourg Institute of Socio-Economic*  
17  
18 8 *Research (LISER), Esch-sur-Alzette, Luxembourg*  
19  
20

21 9  
22  
23 10  
24 11  
25 12  
26 13  
27 14  
28 15  
29 16  
30 16  
31 17 Correspondence:

32 18  
33 19 Orison O. Woolcott, M.D.  
34 20 Ronin Institute  
35 21 Montclair, NJ  
36 22 United States of America  
37 23 Telephone: +1 (323) 253-2562  
38 24 Email: [Orison.Woolcott@gmail.com](mailto:Orison.Woolcott@gmail.com)  
39 25  
40 26

41 27 Abstract word count: 300

42  
43 28 Text word count: 4,225  
44  
45 29

46  
47 30 Keywords: General Obesity, NHANES, Prevalence, Relative Fat Mass, RFM, Trends.  
48  
49  
50  
51  
52  
53  
54  
55  
56  
57

## 1 **ABSTRACT**

2 **Objectives:** The body mass index (BMI) largely underestimates excess body fat, suggesting  
3 that the prevalence of obesity could be underestimated. Biologically, women are known to have  
4 higher body fat than men. This study aimed to compare the temporal trends in general obesity  
5 by sex, ethnicity, and age among adults in the United States using the relative fat mass (RFM),  
6 a validated surrogate for whole-body fat percentage, and BMI.

7 **Design:** Population-based study

8 **Setting:** U.S. National Health and Nutrition Examination Survey (NHANES), from 1999-2000  
9 through 2017-March 2020.

10 **Participants:** A representative sample of adults 20-79 years in the U.S.

11 **Main outcome measures:** Age-adjusted prevalence of general obesity. RFM-defined obesity  
12 was diagnosed using validated cutoffs to predict all-cause mortality: RFM  $\geq 40\%$  for women and  
13  $\geq 30\%$  for men. BMI-defined obesity was diagnosed using a cutoff of 30 kg/m<sup>2</sup>.

14 **Results:** Analysis included data from 47,667 adults. Among women, RFM-defined obesity  
15 prevalence was 64.7% (95% confidence interval, 62.1-67.3%) in 2017-2020, a linear increase of  
16 13.9 percentage points (9.0-18.9%;  $P < 0.001$ ) relative to 1999-2000. In contrast, the prevalence  
17 of BMI-defined obesity was 42.2% (39.4-45.0%) in 2017-2020. Among men, the corresponding  
18 RFM-defined obesity prevalence was 45.8% (42.0-49.7%), a linear increase of 12.0 percentage  
19 points (6.6-17.3%;  $P < 0.001$ ). In contrast, the prevalence of BMI-defined obesity was 42.0 (37.8-  
20 46.3%). The highest prevalence of RFM-defined obesity across years was observed in older  
21 adults (60-79 years) and Mexican Americans, in women and men. Conversely, the highest  
22 prevalence of BMI-defined obesity across years was observed in middle-age (40-59 years) and  
23 older adults, and in African American women.

1  
2  
3 1 **Conclusions:** The use of a surrogate for whole-body fat percentage revealed a much higher  
4  
5 2 prevalence of general obesity in the U.S. from 1999 to 2020, particularly among women, than  
6  
7 3 that estimated using BMI, and detected a disproportionate higher prevalence of general obesity  
8  
9 4 in older adults and Mexican Americans.  
10  
11  
12 5  
13  
14  
15  
16  
17  
18  
19  
20  
21  
22  
23  
24  
25  
26  
27  
28  
29  
30  
31  
32  
33  
34  
35  
36  
37  
38  
39  
40  
41  
42  
43  
44  
45  
46  
47  
48  
49  
50  
51  
52  
53  
54  
55  
56  
57  
58  
59  
60

For peer review only

**STRENGTHS AND LIMITATIONS OF THIS STUDY**

- RFM is a validated surrogate for whole-body fat percentage that has a high diagnostic accuracy (91%) for DXA-defined obesity.
- The diagnosis of obesity was based on measured anthropometrics and validated RFM cutoffs associated with increased risk for all-cause mortality.
- RFM requires only waist circumference and height for its calculation.
- The proportion of obesity misclassification is not trivial when using RFM.
- Estimates of temporal trends in obesity was not possible for Asian Americans.

peer review only

## 1 INTRODUCTION

2 The prevalence of obesity (excess body fat) in the United States has doubled from 15.0% in  
3 1976-1980 to 30.9% in 1999-2000 <sup>1</sup>, and it continues to increase <sup>2,3</sup>. The age-adjusted  
4 prevalence of obesity among adults in the U.S. has been estimated at 41.9% in 2017-March  
5 2020 <sup>4</sup>. Obesity diagnosis is based on the body mass index (BMI), an indirect measure of body  
6 fat <sup>5,6</sup>. BMI is calculated as the ratio of body weight in kilograms to the square of the height in  
7 meters <sup>7</sup>. BMI does not distinguish between fat mass and fat-free mass and does not account  
8 for differences in adiposity between women and men. Biologically, women are known to have  
9 higher body fat than men <sup>8-12</sup>. A meta-analysis of 25 international studies comprising nearly  
10 32,000 adults concluded that BMI underestimates ~50% of all individuals with excess body fat  
11 percentage determined by reference techniques <sup>11</sup>, suggesting that the prevalence of obesity  
12 could be largely underestimated among countries.

13 There is robust evidence linking high whole-body fat percentage with increased risk of death <sup>13-</sup>  
14 <sup>20</sup>, supporting the need for a better assessment of body adiposity. Although the limitations of  
15 BMI to assess body adiposity are widely acknowledged <sup>6,8-11,21,22</sup>, BMI remains the most widely  
16 used anthropometric index in clinical practice, epidemiology, and public health, given its  
17 simplicity, very low cost, and its association with several clinical conditions and mortality <sup>6</sup>. The  
18 high cost and time required to assess body adiposity using more accurate techniques such as  
19 dual-energy x-ray absorptiometry (DXA), dual-labeled water, or magnetic resonance, prevents  
20 their use in large populations or clinical practice as part of routine screening.

21 The relative fat mass (RFM) is a simple and low-cost anthropometric index developed to  
22 estimate whole-body fat percentage <sup>23</sup>. RFM is a linear equation based on the ratio of height to  
23 waist circumference that has been validated in Mexican, European, and African Americans <sup>23</sup>,  
24 and in other populations <sup>24-26</sup>. Compared with BMI, RFM resulted in lower obesity  
25 misclassification when DXA was used as the reference method for diagnosing obesity in adults



1  
2  
3 1 <sup>24 27</sup>. The accuracy of RFM in diagnosing high body fat percentage is superior to that of BMI  
4  
5 2 among men and similar to BMI among women <sup>23</sup>. In an analysis of a representative sample of  
6  
7 3 the U.S. adult population (NHANES 1999-2006), RFM had a diagnostic accuracy of 91% (C-  
8  
9 4 statistic = 0.91) for DXA-defined obesity in women and men <sup>27</sup>.

11  
12 5 Recent studies have examined the U.S. prevalence trends in obesity using BMI as diagnostic  
13  
14 6 tool <sup>3 28 29</sup>. Although data on body fat percentage have also been reported for the U.S. adult  
15  
16 7 population <sup>28</sup>, no body fat cutoffs were used to diagnose general obesity, and the analyses were  
17  
18 8 limited to adults 20-59 years only, and for the period 2011-2018. In fact, body composition has  
19  
20 9 been inconsistently assessed across NHANES survey cycles and across age groups. In  
21  
22 10 addition, no study has compared the trends of general obesity in the U.S. using RFM, a  
23  
24 11 surrogate for body fat percentage, and BMI. Furthermore, no study has examined current  
25  
26 12 obesity trends among U.S. adults over a period of nearly 22 years. The aim of this study was to  
27  
28 13 compare the temporal trends in general obesity by sex, ethnicity, and age group among adults  
29  
30 14 in the U.S. from 1999 to 2020 using RFM and BMI.  
31  
32  
33  
34  
35  
36  
37  
38  
39  
40  
41  
42  
43  
44  
45  
46  
47  
48  
49  
50  
51  
52  
53  
54  
55  
56  
57  
58  
59  
60

## 1 MATERIAL AND METHODS

### 2 Study design, data source, and participants

3 In this population-based study, we performed an analysis of cross-sectional individual-level data  
4 collected by the National Health and Nutrition Examination Survey (NHANES) through  
5 interviews and physical examination in a subset of a representative sample of the U.S.  
6 population from 1999-2000 through 2017-March 2020. Initial complete dataset included 107,622  
7 participants of all ages. NHANES suspended data collection in March 2020 as a consequence  
8 of the COVID-19 pandemic. Thus, the most current cycle data available are “combined data  
9 collected from 2019 to March 2020 with data from the NHANES 2017-2018 cycle to form a  
10 nationally representative sample of NHANES 2017-March 2020 pre-pandemic data”<sup>30</sup>. Analysis  
11 was restricted to adults 20-79 years of age (n=54,232 potentially eligible) because of three  
12 reasons: 1) the diagnosis of obesity in younger adults is based on BMI-for-age percentiles as  
13 recommended by the Centers for Disease Control and Prevention (CDC)<sup>7</sup>; 2) in NHANES 2007-  
14 2008 and subsequent cycles, the upper age limit was 80 years, whereas in earlier cycles the  
15 age limit was 85 years; and 3) to obtain age-adjusted prevalence estimates using 5-year  
16 intervals according to the strata for age and sex available from the 2000 US Census Bureau  
17 (20-24, 25-29, 30-34, 35-39, 40-44, 45-49, 50-54, 55-59, 60-64, 65-69, 70-74, and 75-79)<sup>31</sup>.  
18 Another criterion for inclusion was that individuals had been interviewed and evaluated by  
19 physical examination. Women who reported to be pregnant or had a positive urine pregnancy  
20 test were excluded from analysis. Observations with missing data on body weight, height, or  
21 waist circumference were also excluded.

22 According to the NHANES physical examination protocol, waist circumference was measured  
23 just above the uppermost lateral border of the right ilium (hip bone). Weight and height were  
24 measured using standard methods<sup>32</sup>. Information on ethnicity was collected through a  
25 questionnaire. The mean unweighted response rate for examined sample across survey cycles

1  
2  
3 1 between 1999-2000 and 2017-March 2020 for individuals 20-79 years was 67.5% (range 50.8-  
4  
5 2 74.5%)<sup>33</sup>.

6  
7  
8 3 Since this study used publicly available de-identified data, approval from an Institutional Review  
9  
10 4 Board was not required, as indicated in the Federal Policy for the Protection of Human Subjects  
11  
12 5 (detailed in 45 CFR part 46)<sup>34</sup>.

### 14 15 6 Obesity diagnosis

16  
17  
18 7 General obesity was diagnosed using RFM, a validated surrogate for whole-body fat percentage  
19  
20 8 <sup>23</sup>, and validated cutoffs to predict all-cause mortality: RFM  $\geq 40\%$  for women and  $\geq 30\%$  for men  
21  
22 9 <sup>27</sup>. RFM was calculated as follows:  $RFM = 64 - (20 \times \text{height/waist circumference}) + (12 \times \text{sex})$ ;  
23  
24 10 sex equals 0 for men and 1 for women <sup>23</sup>. BMI-defined obesity was diagnosed if BMI was 30  
25  
26 11  $\text{kg/m}^2$  or higher <sup>7</sup>.

### 28 29 12 Statistical Analysis

30  
31  
32 13 Data collected during the survey cycles from 1999-2000 through 2017-2020 were analyzed  
33  
34 14 using sampling weights following the recommended analytic guidelines, to account for  
35  
36 15 oversampling, nonresponse rates, and subsampling for physical examination <sup>35</sup>. The proportion  
37  
38 16 of missing data was 5.2% of all eligible participants. Given this low percentage of missing data,  
39  
40 17 we performed a complete case analysis <sup>36</sup>. Since age distribution of study samples may vary  
41  
42 18 across survey cycles, all prevalence estimates were adjusted for age to make the estimates  
43  
44 19 more comparable throughout the study period <sup>31</sup>. Estimates across the age categories 20-39,  
45  
46 20 40-59, and 60-79 years were also adjusted for age using 5-year intervals according to  
47  
48 21 corresponding 2000 US Census Bureau age categories by sex <sup>31</sup>. The changes in obesity  
49  
50 22 prevalence from 1999-2000 to 2017-March 2020 were assessed using the Wald test. For  
51  
52 23 multiple comparisons of prevalence across ethnic groups and age groups, we applied the

1 Bonferroni correction. Because Asian Americans were not oversampled before NHANES 2011,  
2 our analyses by ethnicity were restricted to Mexican, European, and African Americans.

3 To determine the possible role of menopause in the high prevalence of RFM-defined obesity in  
4 women, we performed a post hoc analysis. Data related to menopause were self-reported. We  
5 defined postmenopausal women as those with natural menopause and no missing information  
6 on age at menopause. For this analysis, women were excluded if menopause occurred before  
7 age 40 or after age 62<sup>37</sup>, or if they reported oophorectomy (surgical removal of one or two  
8 ovaries), treatment with estrogen/progesterone for hysterectomy/oophorectomy, breastfeeding,  
9 pregnancy in past year of the interview, or irregular period due to medical conditions or  
10 treatment.

11 Temporal trends in prevalence of obesity were tested for the assumption of linearity using  
12 logistic regression models, comparing linear and non-linear regression models using the  
13 likelihood-ratio test<sup>38</sup>. For the non-linear models, restricted cubic splines with 3 knots were used  
14 at years 2001-2002, 2009-2010, and 2017-2020, based on the quantiles recommended by  
15 Harrel<sup>39</sup>. Survey cycles were analyzed as a continuous variable. For visualization purposes,  
16 trend lines were smoothed using the Lowes method<sup>40</sup>. Statistical significance was set to an  
17 alpha level of 0.05. All statistical analyses were performed using Stata 14 for Windows  
18 (StataCorp LP, College Station, TX). Prevalence estimates and standard errors were obtained  
19 using the survey 'svy' command with Taylor linearization.

#### 20 Patient and public involvement

21 Patients and the public were not involved in this study. This study will be available to the public  
22 once it is published in the scientific literature.

## 1 RESULTS

### 2 Clinical characteristics

3 After applying the inclusion and exclusion criteria, the final sample for analysis comprised  
 4 47,667 adults (online supplemental figure 1). The median age of the study population was 45  
 5 years (interquartile range: 33 to 58); 50.6% were women; 67.2% were European Americans,  
 6 11.2% were African Americans, and 8.3% were Mexican Americans (Table 1).

**Table 1.** Characteristics of study participants.\*

| Characteristic                    | All<br>47,667    | Women<br>23,931 (50.6%) | Men<br>23,736 (49.4%) |
|-----------------------------------|------------------|-------------------------|-----------------------|
| Median age (IQR), years           | 45 (33-58)       | 46 (33-59)              | 44 (32-57)            |
| Ethnicity, n (%)                  |                  |                         |                       |
| Mexican American                  | 8,416 (8.3)      | 4,204 (7.7)             | 4,212 (9.0)           |
| European American                 | 19,691 (67.2)    | 9,710 (67.0)            | 9,981 (67.5)          |
| African American                  | 10,673 (11.2)    | 5,417 (12.0)            | 5,256 (10.4)          |
| Other/multi-racial                | 8,887 (13.3)     | 4,600 (13.4)            | 3,928 (13.1)          |
| Body weight (SD), kg              | 82.6 (21.3)      | 76.3 (20.5)             | 89.0 (20.1)           |
| Mean height (SD), cm              | 168.9 (10.0)     | 162.1 (6.9)             | 175.9 (7.5)           |
| Mean waist circumference (SD), cm | 98.5 (16.5)      | 95.9 (16.9)             | 101.2 (15.6)          |
| Mean BMI (SD), kg/m <sup>2</sup>  | 28.9 (6.8)       | 29.0 (7.5)              | 28.7 (5.9)            |
| Mean RFM (SD), %                  | 34.9 (8.5)       | 41.2 (6.0)              | 28.4 (5.3)            |
| RFM-defined obesity, % (95% CI) † | 50.1 (48.9-50.8) | 59.4 (58.4-60.5)        | 40.6 (39.4-41.8)      |
| BMI-defined obesity, % (95% CI) ‡ | 36.2 (35.4-37.1) | 37.8 (36.8-38.7)        | 34.6 (33.5-35.8)      |
| Abdominal obesity, % (95% CI) §   | 54.0 (53.0-55.0) | 63.8 (62.8-64.9)        | 43.9 (42.7-45.1)      |

BMI, body mass index; CI, confidence interval; IQR, interquartile range; RFM, relative fat mass; SD, standard deviation.

\* Sample size represents unweighted data. Estimates represent weighted data.

† Defined as having an RFM of 40% or higher for women and an RFM of 30% or higher for men. RFM was calculated as follows:  $64 - (20 \times \text{height/waist circumference}) + (12 \times \text{sex})$ ; sex equals 0 for men and 1 for women; height and waist circumference were measured in the same units. Estimates were not adjusted for age.

‡ Defined as a having a BMI of 30 kg/m<sup>2</sup> or higher. BMI was calculated as the body weight in kilograms divided by the square of the height in meters. Estimates were not adjusted for age.

§ Defined as having a waist circumference of more than 88 cm for women and more than 102 cm for men, according to the recommendations of the National Cholesterol Education Program (NCEP) Expert Panel on Detection, Evaluation, and Treatment of High Blood Cholesterol in Adults (Adult Treatment Panel III). Estimates were not adjusted for age.

7  
 8 The overall prevalence of obesity by ethnicity in the study participants is shown in the  
 9 supplementary file (online supplemental table 1). The characteristics of the population with  
 10 missing data are shown in online supplemental table 2.

### 1 Obesity prevalence and temporal trends

2 Our findings indicate a higher proportion of individuals with obesity when RFM was used instead  
 3 of BMI. The overall age-adjusted prevalence of RFM-defined obesity increased from 42.4%  
 4 (95% confidence interval, 38.3% to 46.4%) in 1999-2000 to 55.4% (53.0% to 57.9%) in 2017-  
 5 March 2020. The corresponding BMI-defined obesity prevalence increased from 30.4% (26.7%  
 6 to 34.0%) to 42.1% (39.4% to 44.8%). We found a linear increase in the overall prevalence of  
 7 obesity during the study period using either RFM ( $P<0.001$ ;  $P=0.38$  for non-linearity) or BMI  
 8 ( $P<0.001$ ;  $P=0.55$  for non-linearity).

### 9 Obesity prevalence and temporal trends by sex

10 We observed a consistently higher prevalence of RFM-defined obesity in women compared with  
 11 men across years. In contrast, this difference was not consistent for BMI-defined obesity (Figure  
 12 1). In 2017-March 2020, the prevalence of RFM-defined obesity was significantly higher in  
 13 women than in men ( $P<0.001$ ). In contrast, the prevalence of BMI-defined obesity was similar in  
 14 women and men ( $P=0.97$ ). Among women, the prevalence of RFM-defined obesity increased  
 15 from 50.8% (46.2% to 55.3%) in 1999-2000 to 64.7% (62.1% to 67.3%) in 2017-March 2020, a  
 16 linear increase of 13.9 percentage points (9.0% to 18.9%;  $P<0.001$ ). For comparison, the  
 17 prevalence of BMI-defined obesity in women was 42.2% (39.4% to 45.0%) in 2017-March 2020,  
 18 a linear increase of 8.3 percentage points (3.5-13.2%;  $P<0.001$ ) (Table 2).

**Table 2.** Age-adjusted U.S. adult prevalence temporal trends in RFM-defined obesity by sex: 1999-2000 through 2017-March 2020.\*

|                                    | RFM-defined obesity | BMI-defined obesity |
|------------------------------------|---------------------|---------------------|
| <b>All participants (n=47,667)</b> |                     |                     |
| Prevalence, % (95% CI)             |                     |                     |
| 1999-2000                          | 42.4 (38.3-46.4)    | 30.4 (26.7-34)      |

|                                                                                                                                                                                                                                                                                                                                                                                                                                                                                                                                                                                                                                                                                                                                                                                                                                                                                                            |                      |                  |                  |
|------------------------------------------------------------------------------------------------------------------------------------------------------------------------------------------------------------------------------------------------------------------------------------------------------------------------------------------------------------------------------------------------------------------------------------------------------------------------------------------------------------------------------------------------------------------------------------------------------------------------------------------------------------------------------------------------------------------------------------------------------------------------------------------------------------------------------------------------------------------------------------------------------------|----------------------|------------------|------------------|
|                                                                                                                                                                                                                                                                                                                                                                                                                                                                                                                                                                                                                                                                                                                                                                                                                                                                                                            | 2001-2002            | 42.5 (41.1-43.9) | 30.0 (27.6-32.4) |
|                                                                                                                                                                                                                                                                                                                                                                                                                                                                                                                                                                                                                                                                                                                                                                                                                                                                                                            | 2003-2004            | 46.9 (44.7-49.2) | 32.1 (29.3-34.9) |
|                                                                                                                                                                                                                                                                                                                                                                                                                                                                                                                                                                                                                                                                                                                                                                                                                                                                                                            | 2005-2006            | 47.1 (43.7-50.5) | 34.3 (31.1-37.4) |
|                                                                                                                                                                                                                                                                                                                                                                                                                                                                                                                                                                                                                                                                                                                                                                                                                                                                                                            | 2007-2008            | 47.7 (45.0-50.5) | 33.7 (31.5-36.0) |
|                                                                                                                                                                                                                                                                                                                                                                                                                                                                                                                                                                                                                                                                                                                                                                                                                                                                                                            | 2009-2010            | 48.5 (46.1-50.8) | 35.7 (33.6-37.8) |
|                                                                                                                                                                                                                                                                                                                                                                                                                                                                                                                                                                                                                                                                                                                                                                                                                                                                                                            | 2011-2012            | 49.8 (46.6-53.0) | 35.4 (32.5-38.3) |
|                                                                                                                                                                                                                                                                                                                                                                                                                                                                                                                                                                                                                                                                                                                                                                                                                                                                                                            | 2013-2014            | 51.3 (48.7-53.8) | 37.8 (35.6-40)   |
|                                                                                                                                                                                                                                                                                                                                                                                                                                                                                                                                                                                                                                                                                                                                                                                                                                                                                                            | 2015-2016            | 53.7 (49.3-58.0) | 40.0 (36.4-43.6) |
|                                                                                                                                                                                                                                                                                                                                                                                                                                                                                                                                                                                                                                                                                                                                                                                                                                                                                                            | 2017-2020            | 55.4 (53.0-57.9) | 42.1 (39.4-44.8) |
|                                                                                                                                                                                                                                                                                                                                                                                                                                                                                                                                                                                                                                                                                                                                                                                                                                                                                                            | Prevalence change†   | 13.0 (8.5-17.5)  | 11.8 (7.4-16.1)  |
|                                                                                                                                                                                                                                                                                                                                                                                                                                                                                                                                                                                                                                                                                                                                                                                                                                                                                                            | P for non-linearity‡ | 0.38             | 0.55             |
|                                                                                                                                                                                                                                                                                                                                                                                                                                                                                                                                                                                                                                                                                                                                                                                                                                                                                                            | P value for trend‡   | <0.001           | <0.001           |
| <b>Women (n=23,931)</b>                                                                                                                                                                                                                                                                                                                                                                                                                                                                                                                                                                                                                                                                                                                                                                                                                                                                                    |                      |                  |                  |
| Prevalence, % (95% CI)                                                                                                                                                                                                                                                                                                                                                                                                                                                                                                                                                                                                                                                                                                                                                                                                                                                                                     |                      |                  |                  |
|                                                                                                                                                                                                                                                                                                                                                                                                                                                                                                                                                                                                                                                                                                                                                                                                                                                                                                            | 1999-2000            | 50.8 (46.2-55.3) | 33.9 (29.6-38.1) |
|                                                                                                                                                                                                                                                                                                                                                                                                                                                                                                                                                                                                                                                                                                                                                                                                                                                                                                            | 2001-2002            | 51.6 (49.2-53.9) | 32.9 (29.7-36.0) |
|                                                                                                                                                                                                                                                                                                                                                                                                                                                                                                                                                                                                                                                                                                                                                                                                                                                                                                            | 2003-2004            | 55.3 (51.2-59.3) | 33.5 (29.7-37.2) |
|                                                                                                                                                                                                                                                                                                                                                                                                                                                                                                                                                                                                                                                                                                                                                                                                                                                                                                            | 2005-2006            | 53.9 (50.4-57.4) | 34.8 (31.5-38.1) |
|                                                                                                                                                                                                                                                                                                                                                                                                                                                                                                                                                                                                                                                                                                                                                                                                                                                                                                            | 2007-2008            | 56.4 (53.5-59.3) | 35.4 (32.7-38.0) |
|                                                                                                                                                                                                                                                                                                                                                                                                                                                                                                                                                                                                                                                                                                                                                                                                                                                                                                            | 2009-2010            | 58.1 (55.3-60.8) | 36.0 (34.0-37.9) |
|                                                                                                                                                                                                                                                                                                                                                                                                                                                                                                                                                                                                                                                                                                                                                                                                                                                                                                            | 2011-2012            | 60.8 (56.8-63.6) | 36.9 (33.4-40.5) |
|                                                                                                                                                                                                                                                                                                                                                                                                                                                                                                                                                                                                                                                                                                                                                                                                                                                                                                            | 2013-2014            | 61.3 (57.9-64.7) | 40.0 (36.8-43.2) |
|                                                                                                                                                                                                                                                                                                                                                                                                                                                                                                                                                                                                                                                                                                                                                                                                                                                                                                            | 2015-2016            | 64.4 (60.2-68.6) | 41.7 (38.1-45.3) |
|                                                                                                                                                                                                                                                                                                                                                                                                                                                                                                                                                                                                                                                                                                                                                                                                                                                                                                            | 2017-2020            | 64.7 (62.1-67.3) | 42.2 (39.4-45.0) |
|                                                                                                                                                                                                                                                                                                                                                                                                                                                                                                                                                                                                                                                                                                                                                                                                                                                                                                            | Prevalence change†   | 13.9 (9.0-18.9)  | 8.3 (3.5-13.2)   |
|                                                                                                                                                                                                                                                                                                                                                                                                                                                                                                                                                                                                                                                                                                                                                                                                                                                                                                            | P for non-linearity§ | 0.10             | 0.39             |
|                                                                                                                                                                                                                                                                                                                                                                                                                                                                                                                                                                                                                                                                                                                                                                                                                                                                                                            | P value for trend§   | <0.001           | <0.001           |
| <b>Men (n=23,736)</b>                                                                                                                                                                                                                                                                                                                                                                                                                                                                                                                                                                                                                                                                                                                                                                                                                                                                                      |                      |                  |                  |
| Prevalence, % (95% CI)                                                                                                                                                                                                                                                                                                                                                                                                                                                                                                                                                                                                                                                                                                                                                                                                                                                                                     |                      |                  |                  |
|                                                                                                                                                                                                                                                                                                                                                                                                                                                                                                                                                                                                                                                                                                                                                                                                                                                                                                            | 1999-2000            | 33.9 (29.9-37.8) | 27.0 (23.5-30.4) |
|                                                                                                                                                                                                                                                                                                                                                                                                                                                                                                                                                                                                                                                                                                                                                                                                                                                                                                            | 2001-2002            | 33.1 (30.6-35.5) | 27.0 (24.8-29.2) |
|                                                                                                                                                                                                                                                                                                                                                                                                                                                                                                                                                                                                                                                                                                                                                                                                                                                                                                            | 2003-2004            | 38.4 (35.9-40.8) | 30.7 (27.6-33.9) |
|                                                                                                                                                                                                                                                                                                                                                                                                                                                                                                                                                                                                                                                                                                                                                                                                                                                                                                            | 2005-2006            | 40.2 (35.9-44.4) | 33.5 (29.3-37.8) |
|                                                                                                                                                                                                                                                                                                                                                                                                                                                                                                                                                                                                                                                                                                                                                                                                                                                                                                            | 2007-2008            | 38.8 (35.6-42.0) | 32.1 (29.3-34.8) |
|                                                                                                                                                                                                                                                                                                                                                                                                                                                                                                                                                                                                                                                                                                                                                                                                                                                                                                            | 2009-2010            | 38.7 (35.2-42.2) | 35.3 (31.4-39.2) |
|                                                                                                                                                                                                                                                                                                                                                                                                                                                                                                                                                                                                                                                                                                                                                                                                                                                                                                            | 2011-2012            | 39.2 (35.9-42.5) | 33.8 (30.7-36.9) |
|                                                                                                                                                                                                                                                                                                                                                                                                                                                                                                                                                                                                                                                                                                                                                                                                                                                                                                            | 2013-2014            | 41.2 (38.7-43.7) | 35.6 (33.2-38.1) |
|                                                                                                                                                                                                                                                                                                                                                                                                                                                                                                                                                                                                                                                                                                                                                                                                                                                                                                            | 2015-2016            | 42.7 (37.7-47.7) | 38.2 (33.3-43.2) |
|                                                                                                                                                                                                                                                                                                                                                                                                                                                                                                                                                                                                                                                                                                                                                                                                                                                                                                            | 2017-2020            | 45.8 (42.0-49.7) | 42.0 (37.8-46.3) |
|                                                                                                                                                                                                                                                                                                                                                                                                                                                                                                                                                                                                                                                                                                                                                                                                                                                                                                            | Prevalence change†   | 12.0 (6.6-17.3)  | 15.1 (9.8-20.4)  |
|                                                                                                                                                                                                                                                                                                                                                                                                                                                                                                                                                                                                                                                                                                                                                                                                                                                                                                            | P for non-linearity§ | 0.82             | 0.84             |
|                                                                                                                                                                                                                                                                                                                                                                                                                                                                                                                                                                                                                                                                                                                                                                                                                                                                                                            | P value for trend§   | <0.001           | <0.001           |
| <p>BMI, body mass index; CI, confidence interval; RFM, relative fat mass.</p> <p>* Prevalence estimates represent weighted data. RFM-defined obesity was diagnosed as having an RFM of 40% or higher for women and having an RFM of 30% or higher for men. RFM was calculated as follows: <math>64 - (20 \times \text{height/waist circumference}) + (12 \times \text{sex})</math>; sex equals 0 for men and 1 for women. Height and waist circumference were measured in the same units. BMI-defined obesity was diagnosed as having a BMI of 30 kg/m<sup>2</sup> or higher. BMI was calculated as the body weight in kilograms divided by the square of the height in meters. Estimates were not adjusted for age.</p> <p>† Absolute difference (prevalence in 2017-2020 minus the prevalence in 1999-2000).</p> <p>‡ Adjusted for age, sex, and ethnicity.</p> <p>§ Adjusted for age and ethnicity.</p> |                      |                  |                  |

1  
2  
3  
4  
5  
6  
7  
8  
9  
10  
11  
12  
13  
14  
15  
16  
17  
18  
19  
20  
21  
22  
23  
24  
25  
26  
27  
28  
29  
30  
31  
32  
33  
34  
35  
36  
37  
38  
39  
40  
41  
42  
43  
44  
45  
46  
47  
48  
49  
50  
51  
52  
53  
54  
55  
56  
57  
58  
59  
60

1  
2  
3

Among men, the prevalence of RFM-defined obesity increased from 33.9% (29.9% to 37.8%) in 1999-2000 to 45.8% (42.0% to 49.7%) in 2017-March 2020, a linear increase of 12.0

1 percentage points (6.6% to 17.3%;  $P<0.001$ ). The prevalence of BMI-defined obesity in men  
2 was 42.0% (37.8% to 46.3%) in 2017-March 2020, a linear increase of 15.1 percentage points  
3 (9.8% to 20.4%).

#### 4 Obesity prevalence and temporal trends by ethnicity

5 The highest prevalence of RFM-defined obesity across years was observed among Mexican  
6 Americans. In contrast, the highest prevalence of BMI-defined obesity was observed among  
7 African American women but not men (Figure 2). In 2017-March 2020, the prevalence of RFM-  
8 defined obesity was significantly higher in Mexican Americans compared with African Americans  
9 (Bonferroni corrected  $P<0.001$ ) or European Americans ( $P<0.001$ ). BMI-defined obesity  
10 prevalence was similar in Mexican and African Americans ( $P=0.99$ ) and both groups had a  
11 higher prevalence than European Americans ( $P=0.003$  and  $P=0.001$ , respectively).

12 The largest increase in the prevalence of RFM-defined obesity from 1999-2000 to 2017-March  
13 2020 occurred in Mexican American men, with a linear increase of 18.3 percentage points  
14 (12.0% to 24.5%;  $P<0.001$ ) (online supplemental table 3 and Figure 2). The highest increase in  
15 the prevalence of BMI-defined obesity also occurred in Mexican American men, with a linear  
16 increase of 21.2 percentage points (15.3% to 27.1%;  $P<0.001$ ) (online supplemental table 3 and  
17 Figure 2).

#### 18 Obesity prevalence and temporal trends by age group

19 In women and men, the highest prevalence of RFM-defined obesity across years was observed  
20 in older adults (60-79 years) (Figure 3 and online supplemental table 4).

21  
22 In contrast, no differences were observed in the prevalence of obesity between individuals 60-  
23 79 years and 40-59 years when using BMI for the diagnosis of obesity (Figure 3). In 2017-March



1  
2  
3 1 2020, the prevalence of RFM-defined obesity was significantly higher in individuals 60-79 years  
4  
5 2 compared with those 40-59 years (Bonferroni corrected  $P < 0.001$ ) or 20-39 years ( $P < 0.001$ ). We  
6  
7 3 found no statistically significant differences in the prevalence of BMI-defined obesity across age  
8  
9 4 groups ( $P > 0.17$  for all comparisons).

11  
12 5 Although our analysis by age showed an increased prevalence of obesity in older women and  
13  
14 6 men (Figure 3), we performed a sensitivity analysis to specifically explore the possible role of  
15  
16 7 menopause. Our findings from this post hoc analysis revealed that the crude prevalence of  
17  
18 8 RFM-defined obesity in 2017-2020 was 56.4% (95% CI, 53.5-59.3%) among premenopausal  
19  
20 9 women ( $n = 1,935$ ) and 76.4% (71.0-81.8%) among postmenopausal women ( $n = 1,406$ ). The  
21  
22 10 mean age at last menstrual period was 49 years in this population. For comparison, among  
23  
24 11 men, the corresponding prevalence of obesity was 39.7% (34.9-44.6%) in those younger than  
25  
26 12 50 years ( $n = 1,790$ ) and 56.2% (52.9-59.5%) in men 50 years of age and older ( $n = 1,886$ ).

## 1 DISCUSSION

2 Our study shows that, compared with BMI, the use of a surrogate for whole-body fat percentage  
3 revealed a much higher prevalence of general obesity among adults in the U.S., particularly  
4 among women, affecting nearly two-thirds of all women and nearly half of all men in 2017-2020,  
5 with an overall prevalence of 55.4%. This is an additional 22.5% of women and 3.8% of men 20-  
6 79 years being defined as obese compared with a BMI-based definition with the current criteria.

7 The use of RFM also revealed that the highest prevalence of general obesity over the study  
8 period from 1999 to 2020 occurred among Mexican Americans and not among African  
9 Americans, as was observed when BMI was used to diagnose obesity. Likewise, the use of  
10 RFM showed that the highest prevalence of general obesity over this study period occurred  
11 among older adults (60-79 years) and not among adults 40-59 years, as was observed when  
12 BMI was used. The higher prevalence of obesity in older individuals does not appear to be fully  
13 explained by a loss of skeletal muscle with age, since absolute fat mass also increases with  
14 age, although mainly visceral fat<sup>41 42</sup>. However, it is difficult to draw a firm conclusion from  
15 cross-sectional data. Our findings are consistent with those from other studies also showing a  
16 higher body fat percentage in older individuals<sup>12 23 41 43-46</sup>.

17 Overall, women had a markedly higher prevalence of RFM-defined obesity across years than  
18 men, a difference that was less evident when using BMI. Previous studies have shown no  
19 differences in the prevalence of BMI-defined obesity between women and men<sup>3 4 47</sup>. In the  
20 present study, the difference in the prevalence of RFM-defined obesity for 2017-2020 between  
21 women and men was nearly 20 percentage points.

22 The highest prevalence of RFM-defined obesity was observed in Mexican Americans, and the  
23 increase was linear over the study period, albeit this linear increase was largely driven by a  
24 steady increase among men. Among Mexican American women, a decrease was observed

1 since 2015. A previous study reported that, between 2003 and 2006, the prevalence of BMI-  
2 defined obesity was higher among African Americans compared with Mexican Americans, but  
3 between 2015 and 2018, Mexican American men had a higher prevalence than African  
4 American men<sup>29</sup>. In contrast, RFM revealed a consistently higher prevalence of general obesity  
5 among Mexican Americans over the observed time, in both women and men. Socio-economic  
6 characteristics are probably the main determinants of differences in the prevalence of general  
7 obesity between ethnic groups<sup>48</sup>.

8 It has been argued that the fat mass index (FMI, body fat mass adjusted for the square of the  
9 height, expressed in kg/m<sup>2</sup>) should be used as a reference of fat mass instead of body fat  
10 percentage (body fat mass adjusted for body weight) to avoid including fat mass both in the  
11 numerator and the denominator, as this is not mathematically advisable<sup>49</sup>. However, the  
12 concept of obesity (excess body fat) and all different forms to express it, for example BMI<sup>6 50 51</sup>,  
13 FMI<sup>52 53</sup>, fat mass/fat-free-mass<sup>54 55</sup>, body fat percentage<sup>12 56</sup>, to cite a few, should not be seen  
14 only as mathematical constructs but also as biological variables with important implications as  
15 risk factors for disease and mortality. In the present study, we chose body fat percentage as the  
16 reference because numerous studies have shown that body fat percentage is associated with  
17 mortality<sup>13-20 57</sup>. What is also important to note is that FMI does not appear to be superior to  
18 body fat percentage or BMI as a predictor of cardiovascular mortality<sup>14</sup>, all-cause mortality<sup>58 59</sup>  
19 or cardiovascular risk factors<sup>60</sup>. Because of its association with mortality, body fat percentage is  
20 of great clinical relevance. Recent studies support the utility of RFM to predict type 2 diabetes<sup>61</sup>  
21 and heart failure<sup>62</sup>.

22 Further research is needed to better understand the clinical implications of our study findings: 1)  
23 the much higher prevalence of general obesity among women when RFM is used as opposed to  
24 BMI; 2) the higher burden of general obesity on Mexican Americans compared with African and  
25 European Americans; and 3) the higher prevalence of general obesity in older individuals.

1  
2  
3 1 It is difficult to establish whether the higher prevalence of general obesity estimated using RFM  
4  
5 2 would translate into a higher risk of cardiovascular disease (CVD). The association between  
6  
7 3 obesity and CVD is very complex and several factors may mediate this association <sup>63</sup>. Although  
8  
9 4 subcutaneous fat appears to have a relative protective effect against CVD <sup>64</sup>, others have  
10  
11 5 shown that subcutaneous fat is also associated with cardiovascular risk factors, although less  
12  
13 6 strongly than visceral fat <sup>65</sup>. A major limitation of these studies, however, is that the analyses  
14  
15 7 involved a small region of the abdominal trunk.

16  
17  
18 8 In women, who biologically have a higher body adiposity than men, the possible protective  
19  
20 9 effect of estrogens on metabolism could be attenuated by the high prevalence of RFM-defined  
21  
22 10 obesity. This could help explain, for example, the similar relative increase in the U.S. prevalence  
23  
24 11 of diabetes in women and men from 1999 to 2019 (by ~74%) ([www.healthdata.org](http://www.healthdata.org)) or the  
25  
26 12 similar prevalence of diabetes in women (14.1% [11.8-16.7%]) and men (15.4% [13.5-17.5%]) in  
27  
28 13 2017-2020 <sup>66</sup>. Our findings, although cross-sectional, do not appear to support a protective role  
29  
30 14 of estrogens against obesity *per se*.

31  
32  
33  
34 15 The temporal trends in RFM- and BMI-defined obesity in both women and men follow a parallel  
35  
36 16 pattern. However, stratified analysis by ethnicity showed some differences. RFM revealed that  
37  
38 17 Mexican Americans have a higher prevalence of obesity than European or African Americans.  
39  
40 18 Although we cannot establish causality, this finding coincides with the higher absolute increase  
41  
42 19 in the prevalence of diabetes and liver disease observed in Mexican Americans from 1999 to  
43  
44 20 2018 compared with European and African Americans <sup>67</sup>.

45  
46  
47 21 Whether the increased whole-body fat percentage in older individuals confers a higher risk on  
48  
49 22 mortality also requires further investigation as age *per se* is a strong risk factor for mortality <sup>68</sup>,  
50  
51 23 and the relationship between obesity and mortality could be mediated by age <sup>69</sup>. In addition, this  
52  
53 24 can be confounded by concomitant severe disease. For instance, several studies have shown  
54  
55 25 an inverse association between body fat percentage (but also BMI and FMI) and mortality in

1  
2  
3 1 older patients<sup>59 70 71</sup>. Conversely, the high body fat percentage in older individuals could explain  
4  
5 2 the association of BMI-defined obesity with diabetes and cardiovascular disease in older  
6  
7 3 individuals<sup>72-75</sup>. The increase in body adiposity with aging coincides with the high prevalence of  
8  
9 4 many cardiometabolic alterations occurring more often in older individuals, such as glucose  
10  
11 5 intolerance, insulin resistance, dyslipidemia, and hypertension<sup>69</sup>. BMI did not detect a higher  
12  
13 6 prevalence of general obesity in individuals aged 60 years and older compared with younger  
14  
15 7 adults, unlike when RFM was used. These findings further support that notion that BMI is a poor  
16  
17 8 predictor of morbidity and mortality in older individuals<sup>46 76</sup>.

19  
20  
21 9 Abdominal obesity and general obesity are overall underestimated when using BMI (Table 1  
22  
23 10 and online supplemental table 1). It is also important to mention that the prevalence of  
24  
25 11 abdominal obesity is overall higher compared with the prevalence of RFM-defined obesity,  
26  
27 12 except among Mexican Americans (online supplementary table 1). However, the closer  
28  
29 13 proportions of abdominal obesity and RFM-defined general obesity is expected. Since RFM is  
30  
31 14 based on waist circumference, and waist circumference is a surrogate for intra-abdominal fat<sup>77</sup>  
32  
33 15<sup>78</sup>, RFM could be a surrogate for both general obesity and abdominal obesity. Although RFM  
34  
35 16 has been shown to predict trunk fat percentage, the prediction error is greater for trunk fat  
36  
37 17 percentage than for whole-body fat percentage<sup>23</sup>.

38  
39  
40 18 It is plausible that the association of fat mass with mortality is, at least partly, reflecting the effect  
41  
42 19 of fat-free mass on mortality. Although body fat percentage is associated with mortality, the  
43  
44 20 implications of fat-free mass percentage, as opposed to body fat percentage, as a predictor of  
45  
46 21 mortality require careful examination. Although the proportion of body FFM is the numeric  
47  
48 22 complement of the proportion of body fat mass ( $\%FM=100\%-\%FFM$ ), this does not take into  
49  
50 23 account the fact that FFM is not exclusively muscle mass. Unless muscle mass and fat mass  
51  
52 24 are measured accurately, it will be difficult to distinguish the overall contribution of fat mass from  
53  
54 25 the largest metabolically tissue in the body, the skeletal muscle, to predict mortality. The

1  
2  
3 1 problem is that accurate estimates of skeletal muscle mass remain a challenge <sup>79</sup>. The current  
4  
5 2 evidence suggests that increased fat mass is associated with higher mortality whereas  
6  
7 3 increased fat-free mass is associated with lower mortality <sup>13 80 81</sup>.

8  
9  
10 4 The opposite relationship of fat mass and fat-free mass with mortality could be altered due to  
11  
12 5 weight loss interventions (which induce more fat mass loss than muscle mass loss) or because  
13  
14 6 of loss of muscle mass due to age <sup>82</sup>. In older individuals, increased fat-free mass has been  
15  
16 7 associated with lower mortality, whereas lower fat mass has also been associated with  
17  
18 8 increased risk of mortality <sup>83</sup>, suggesting frailty could be a more important factor for mortality risk  
19  
20 9 than body composition. Future studies should focus on comparing the association of fat mass  
21  
22 10 and the metabolic components of fat-free mass with mortality. The muscle-mass centric view of  
23  
24 11 health or disease <sup>84 85</sup>, rather than focusing on BMI or body fat percentage, is interesting but  
25  
26 12 requires further research due to the complex interrelationship between fat mass and fat-free  
27  
28 13 mass (and muscle mass).

29  
30  
31  
32 14 Our study has strengths. First, we used a previously validated surrogate for whole-body fat  
33  
34 15 percentage in adults in the U.S. <sup>23</sup>, which has a high diagnostic accuracy (91%) for DXA-defined  
35  
36 16 obesity <sup>27</sup> and has been shown to result in lower total misclassification of DXA-defined high  
37  
38 17 body adiposity compared with BMI among women (RFM: 12.7%; BMI: 56.5%) and men (RFM:  
39  
40 18 9.4% BMI: 13.0%) <sup>23</sup>. Second, to define general obesity, we used previously validated RFM  
41  
42 19 cutoffs to predict all-cause mortality in a large U.S. adult population <sup>27</sup>. Previously proposed  
43  
44 20 cutoffs for fat-defined obesity have been based on arbitrary values <sup>86 87</sup> or on corresponding BMI  
45  
46 21 cutoffs <sup>12</sup>. Third, we used measured anthropometrics. RFM requires only waist circumference  
47  
48 22 and height for its calculation, which allowed us to estimate the prevalence of general obesity in  
49  
50 23 a large adult population of the U.S. (n=44,754) with a wide age range, over a period of nearly 22  
51  
52 24 years. Fourth, NHANES have used a consistent methodology across survey cycles to measure  
53  
54 25 anthropometrics, reducing the risk of measurement error that could affect our results.

1  
2  
3 1 Our study also has limitations. First, RFM was developed and validated using DXA as the  
4  
5 2 reference method. However, DXA is an indirect method to assess body fatness and is  
6  
7 3 susceptible to bias introduced mainly by age, degree of fatness, and disease<sup>88 89</sup>. Thus, there  
8  
9 4 are limitations to the level of accuracy and precision that RFM can perform. Nevertheless, RFM  
10  
11 5 is an attempt to provide a relatively easy and affordable alternative method to BMI to better  
12  
13 6 assess body fatness. Second, although the overall obesity misclassification has been reported  
14  
15 7 to be lower with RFM than with BMI in American (21) and Korean individuals (20), another  
16  
17 8 limitation is that the proportion of obesity misclassification is not trivial when using RFM. Third,  
18  
19 9 our analysis was performed using data from a representative sample of the non-institutionalized  
20  
21 10 U.S. population only. Fourth, our estimates of prevalence trends could have been affected by  
22  
23 11 some variability in sampling across NHANES survey cycles<sup>35</sup>. Finally, we did not analyze the  
24  
25 12 prevalence trends for Asian Americans during the period studied because NHANES began  
26  
27 13 oversampling Asian Americans only from 2011-2012 onwards and RFM cutoffs used to  
28  
29 14 diagnose general obesity have not been validated among Asian populations.

30  
31  
32  
33 15 From a public health perspective, we argue that due to the underdiagnosis of obesity when  
34  
35 16 using BMI, the most affected populations are not receiving adequate medical care that they  
36  
37 17 require. Aspects that will need further research are the implications of some possible  
38  
39 18 overdiagnosis of obesity<sup>90</sup> and the stigma that would be associated with it<sup>91</sup>.

40  
41  
42 19 In conclusion, the use of RFM, a surrogate for whole-body fat percentage, revealed a much  
43  
44 20 higher prevalence of general obesity in the U.S. from 1999 to 2020, particularly among women,  
45  
46 21 than that estimated by BMI. RFM, but not BMI, also revealed a disproportionate higher  
47  
48 22 prevalence of general obesity in adults aged 60 years and older and Mexican Americans. Using  
49  
50 23 BMI as the lone measure to define obesity may lead to significant misclassification of large  
51  
52 24 obese subpopulations as non-obese, particularly among women. Our findings may have  
53  
54  
55  
56  
57  
58  
59  
60

- 1
- 2
- 3 1 implications for the use of resources in public health to tackle obesity-related health problems in
- 4
- 5 2 the most affected populations.
- 6
- 7
- 8
- 9
- 10
- 11
- 12
- 13
- 14
- 15
- 16
- 17
- 18
- 19
- 20
- 21
- 22
- 23
- 24
- 25
- 26
- 27
- 28
- 29
- 30
- 31
- 32
- 33
- 34
- 35
- 36
- 37
- 38
- 39
- 40
- 41
- 42
- 43
- 44
- 45
- 46
- 47
- 48
- 49
- 50
- 51
- 52
- 53
- 54
- 55
- 56
- 57
- 58
- 59
- 60

For peer review only



## 1           2           3           4           5           6           7           8           9           10           11           12           13           14           15           16           17           18           19           20           21           22           23           24           25           26           27           28           29           30           31           32           33           34           35           36           37           38           39           40           41           42           43           44           45           46           47           48           49           50           51           52           53           54           55           56           57           58           59           60

### 1   **ETHICS APPROVAL**

2   Since this study used publicly available de-identified data, approval from an Institutional Review  
3   Board was not required, as indicated in the Federal Policy for the Protection of Human Subjects  
4   (detailed in 45 CFR part 46) 35.

### 6   **DATA AVAILABILITY STATEMENT**

7   All data utilized are publicly and freely available from the NHANES website at  
8   <https://wwwn.cdc.gov/nchs/nhanes/>

### 10   **ACKNOWLEDGMENTS**

11   We thank the Centers for Disease Control and Prevention (CDC) and the National Center for  
12   Health Statistics (NCHS) for providing access to the NHANES datasets. We also thank all  
13   subjects who participated in the surveys from 1999 through 2020.

## 1 **AUTHOR CONTRIBUTIONS**

2 OOW was responsible for the conception and design of the study. OOW contributed to the  
3 statistical analysis. OOW and TS contributed to the interpretation of data and critical revision of  
4 the manuscript. OOW and TS drafted the final version of the manuscript and agreed to the  
5 submitted version of the manuscript. OOW is the manuscript's guarantor. OOW accepts full  
6 responsibility for the work and the conduct of the study, had access to the data, and controlled  
7 the decision to submit for publication.

## 8 **FUNDING**

9 This research received no specific grant from any funding agency in the public, commercial or  
10 not-for-profit sectors.

## 11 **COMPETING INTERESTS**

12 OOW is the lead author of the original article describing the development and validation of RFM.  
13 OOW currently works as an editor for The Lancet group. TS declares no conflict of interest.

## 14 **TRANSPARENCY STATEMENT**

15 OW (the manuscript's guarantor) affirms that the manuscript is an honest, accurate, and  
16 transparent account of the study being reported; that no important aspects of the study have  
17 been omitted; and that any discrepancies from the study as originally planned have been  
18 explained.

## 19 **PATIENT AND PUBLIC INVOLVEMENT**

20 Patients and the public were not involved in this study. This study will be available to the public  
21 once it is published in the scientific literature.

1  
2  
3 **1 REFERENCES**  
4  
5

- 6 2 1. Flegal KM, Carroll MD, Ogden CL, et al. Prevalence and trends in obesity among US adults,  
7 3 1999-2000. *JAMA* 2002;288(14):1723-7. doi: 10.1001/jama.288.14.1723
- 8 4 2. Flegal KM, Kruszon-Moran D, Carroll MD, et al. Trends in Obesity Among Adults in the  
9 5 United States, 2005 to 2014. *JAMA* 2016;315(21):2284-91. doi: 10.1001/jama.2016.6458
- 10 6 3. Hales CM, Carroll MD, Fryar CD, et al. Prevalence of obesity and severe obesity among  
11 7 adults: United States, 2017-2018. *NCHS Data Brief* 2020(360):1-8.
- 12 8 4. Stierman B, Afful J, Carroll MD, et al. National Health and Nutrition Examination Survey  
13 9 2017–March 2020 prepandemic data files - Development of files and prevalence estimates for  
14 10 selected health outcomes. *National Health Statistics Reports* 2021(158):1-20.
- 15 11 5. Rothman KJ. BMI-related errors in the measurement of obesity. *Int J Obes (Lond)* 2008;32  
16 12 Suppl 3:S56-9. doi: 10.1038/ijo.2008.87
- 17 13 6. WHO. Physical status: the use and interpretation of anthropometry. WHO Technical Report  
18 14 Series. Geneva, 1995.
- 19 15 7. CDC. Defining adult overweight & obesity. Available at:  
20 16 <https://www.cdc.gov/obesity/basics/adult-defining.html>. Accessed April 18, 2022.
- 21 17 8. Garn SM, Leonard WR, Hawthorne VM. Three limitations of the body mass index. *Am J Clin*  
22 18 *Nutr* 1986;44(6):996-7. doi: 10.1093/ajcn/44.6.996
- 23 19 9. Gallagher D, Visser M, Sepulveda D, et al. How useful is body mass index for comparison of  
24 20 body fatness across age, sex, and ethnic groups? *Am J Epidemiol* 1996;143(3):228-39.
- 25 21 10. Romero-Corral A, Montori VM, Somers VK, et al. Association of bodyweight with total  
26 22 mortality and with cardiovascular events in coronary artery disease: a systematic review of  
27 23 cohort studies. *Lancet* 2006;368(9536):666-78. doi: 10.1016/S0140-6736(06)69251-9
- 28 24 11. Okorodudu DO, Jumean MF, Montori VM, et al. Diagnostic performance of body mass index  
29 25 to identify obesity as defined by body adiposity: a systematic review and meta-analysis. *Int J*  
30 26 *Obes (Lond)* 2010;34(5):791-9. doi: 10.1038/ijo.2010.5
- 31 27 12. Gallagher D, Heymsfield SB, Heo M, et al. Healthy percentage body fat ranges: an  
32 28 approach for developing guidelines based on body mass index. *Am J Clin Nutr* 2000;72(3):694-  
33 29 701.
- 34 30 13. Heitmann BL, Erikson H, Ellsinger BM, et al. Mortality associated with body fat, fat-free  
35 31 mass and body mass index among 60-year-old swedish men-a 22-year follow-up. The study of  
36 32 men born in 1913. *Int J Obes Relat Metab Disord* 2000;24(1):33-7.
- 37 33 14. Ortega FB, Sui X, Lavie CJ, et al. Body Mass Index, the most widely used but also widely  
38 34 criticized index: Would a criterion standard measure of total body fat be a better predictor of  
39 35 cardiovascular disease mortality? *Mayo Clin Proc* 2016;91(4):443-55.
- 40 36 15. Padwal R, Leslie WD, Lix LM, et al. Relationship Among Body Fat Percentage, Body Mass  
41 37 Index, and All-Cause Mortality: A Cohort Study. *Ann Intern Med* 2016;164(8):532-41.
- 42 38 16. Zong G, Zhang Z, Yang Q, et al. Total and regional adiposity measured by dual-energy X-  
43 39 ray absorptiometry and mortality in NHANES 1999-2006. *Obesity (Silver Spring)*  
44 40 2016;24(11):2414-21. doi: 10.1002/oby.21659

- 1  
2  
3 1 17. Dong B, Peng Y, Wang Z, et al. Joint association between body fat and its distribution with  
4 2 all-cause mortality: A data linkage cohort study based on NHANES (1988-2011). *PLoS One*  
5 3 2018;13(2):e0193368. doi: 10.1371/journal.pone.0193368  
6  
7 4 18. Lahmann PH, Lissner L, Gullberg B, et al. A prospective study of adiposity and all-cause  
8 5 mortality: the Malmo Diet and Cancer Study. *Obes Res* 2002;10(5):361-9. doi:  
9 6 10.1038/oby.2002.50  
10  
11 7 19. Jenkins DA, Bowden J, Robinson HA, et al. Adiposity-mortality relationships in type 2  
12 8 diabetes, coronary heart disease, and cancer subgroups in the UK Biobank, and their  
13 9 modification by smoking. *Diabetes Care* 2018;41(9):1878-86. doi: 10.2337/dc17-2508  
14  
15 10 20. Jayedi A, Khan TA, Aune D, et al. Body fat and risk of all-cause mortality: a systematic  
16 11 review and dose-response meta-analysis of prospective cohort studies. *Int J Obes (Lond)*  
17 12 2022;46(9):1573-81. doi: 10.1038/s41366-022-01165-5  
18  
19 13 21. Nuttall FQ. Body Mass Index: Obesity, BMI, and Health: A Critical Review. *Nutr Today*  
20 14 2015;50(3):117-28. doi: 10.1097/NT.0000000000000092  
21  
22 15 22. CDC. Body mass index : considerations for practitioners.  
23 16 <https://stacks.cdc.gov/view/cdc/25368> [Accessed December 8, 2021].  
24  
25 17 23. Woolcott OO, Bergman RN. Relative fat mass (RFM) as a new estimator of whole-body fat  
26 18 percentage – A cross-sectional study in American adult individuals. *Sci Rep* 2018;8(1):10980.  
27 19 doi: doi.org/10.1038/s41598-018-29362-1  
28  
29 20 24. Paek JK, Kim J, Kim K, et al. Usefulness of relative fat mass in estimating body adiposity in  
30 21 Korean adult population. *Endocr J* 2019;66(8):723-29. doi: 10.1507/endocrj.EJ19-0064  
31  
32 22 25. Guzman-Leon AE, Velarde AG, Vidal-Salas M, et al. External validation of the relative fat  
33 23 mass (RFM) index in adults from north-west Mexico using different reference methods. *PLoS*  
34 24 *One* 2019;14(12):e0226767. doi: 10.1371/journal.pone.0226767  
35  
36 25 26. Correa CR, Formolo NPS, Dezanetti T, et al. Relative fat mass is a better tool to diagnose  
37 26 high adiposity when compared to body mass index in young male adults: A cross-section study.  
38 27 *Clin Nutr ESPEN* 2021;41:225-33. doi: 10.1016/j.clnesp.2020.12.009  
39  
40 28 27. Woolcott OO, Bergman RN. Defining cutoffs to diagnose obesity using the relative fat mass  
41 29 (RFM): Association with mortality in NHANES 1999-2014. *Int J Obes (Lond)* 2020;44:1301-10.  
42 30 doi: 10.1038/s41366-019-0516-8  
43  
44 31 28. Liu B, Du Y, Wu Y, et al. Trends in obesity and adiposity measures by race or ethnicity  
45 32 among adults in the United States 2011-18: population based study. *BMJ* 2021;372:n365. doi:  
46 33 10.1136/bmj.n365  
47  
48 34 29. Gupta RD, Chakraborty PA, Al Kibria GM. Racial/Ethnic disparities in prevalence and trends  
49 35 of obesity, grade 3 obesity, and abdominal obesity among US adults, 2003-18. *Obesity*  
50 36 *Medicine* 2021;28 (no pagination)(100372) doi: <https://dx.doi.org/10.1016/j.obmed.2021.100372>  
51  
52 37 30. CDC. NHANES 2017-March 2020 pre-pandemic data release notes.  
53 38 <https://www.cdc.gov/nchs/nhanes/continuousnhanes/releasenotes.aspx?Cycle=2017-2020>  
54 39 [Accessed October 10, 2022].  
55  
56 40 31. Day JC. Population Projections of the United States by Age, Sex, Race, and Hispanic  
57 41 Origin: 1995 to 2050, U.S. Bureau of the Census, Current Population Reports. Reports, P25-  
58 42 1130, U.S. Washington, DC, 1996.

- 1  
2  
3 1 32. National Health and Nutrition Examination Survey (NHANES). Anthropometry procedures  
4 2 manual. [http://www.cdc.gov/nchs/data/nhanes/nhanes\\_07\\_08/manual\\_an.pdf](http://www.cdc.gov/nchs/data/nhanes/nhanes_07_08/manual_an.pdf) [Accessed May  
5 3 16, 2016].  
6  
7 4 33. CDC. NHANES response rates and population totals. Available at:  
8 5 <https://www.cdc.gov/nchs/nhanes/responserates.aspx>. Accessed July 19, 2022.  
9  
10 6 34. HHS. U.S. Department of Health & Human Services. Federal policy for the protection of  
11 7 human subjects. [https://www.hhs.gov/ohrp/regulations-and-policy/regulations/common-](https://www.hhs.gov/ohrp/regulations-and-policy/regulations/common-rule/index.html)  
12 8 [rule/index.html](https://www.hhs.gov/ohrp/regulations-and-policy/regulations/common-rule/index.html). Accessed April 2, 2022., 2020.  
13  
14 9 35. Johnson CL, Paulose-Ram R, Ogden CL, et al. National health and nutrition examination  
15 10 survey: analytic guidelines, 1999-2010. *Vital Health Stat 2* 2013(161):1-24.  
16 11 36. CDC. National Health and Nutrition Examination Survey. Module 1: Datasets and  
17 12 Documentation. <https://www.cdc.gov/nchs/nhanes/tutorials/module1.aspx> [accessed July 18,  
18 13 2022].  
19  
20 14 37. Appiah D, Nwabuo CC, Ebong IA, et al. Trends in age at natural menopause and  
21 15 reproductive life span among US women, 1959-2018. *JAMA* 2021;325(13):1328-30. doi:  
22 16 10.1001/jama.2021.0278  
23  
24 17 38. Durrleman S, Simon R. Flexible regression models with cubic splines. *Stat Med*  
25 18 1989;8(5):551-61. doi: 10.1002/sim.4780080504  
26  
27 19 39. Harrell FE. Regression modeling strategies: With applications to linear models, logistic  
28 20 regression, and survival analysis. New York: Springer 2001.  
29  
30 21 40. Cox NJ. Speaking Stata: Smoothing in various directions. *Stata Journal* 2005;5(4):574-93.  
31  
32 22 41. Novak LP. Aging, total body potassium, fat-free mass, and cell mass in males and females  
33 23 between ages 18 and 85 years. *J Gerontol* 1972;27(4):438-43. doi: 10.1093/geronj/27.4.438  
34  
35 24 42. Song M-Y, Ruts E, Kim J, et al. Sarcopenia and increased adipose tissue infiltration of  
36 25 muscle in elderly African American women. *Am J Clin Nutr* 2004;79(5):874-80.  
37  
38 26 43. Deurenberg P, Weststrate JA, Seidell JC. Body mass index as a measure of body fatness:  
39 27 age- and sex-specific prediction formulas. *Br J Nutr* 1991;65(2):105-14.  
40  
41 28 44. Noppa H, Andersson M, Bengtsson C, et al. Body composition in middle-aged women with  
42 29 special reference to the correlation between body fat mass and anthropometric data. *Am J Clin*  
43 30 *Nutr* 1979;32(7):1388-95.  
44  
45 31 45. Jensky-Squires NE, Dieli-Conwright CM, Rossuello A, et al. Validity and reliability of body  
46 32 composition analysers in children and adults. *Br J Nutr* 2008;100(4):859-65. doi:  
47 33 10.1017/S0007114508925460  
48  
49 34 46. Kuk JL, Saunders TJ, Davidson LE, et al. Age-related changes in total and regional fat  
50 35 distribution. *Ageing Res Rev* 2009;8(4):339-48. doi: 10.1016/j.arr.2009.06.001  
51  
52 36 47. Flegal KM, Carroll MD, Kit BK, et al. Prevalence of obesity and trends in the distribution of  
53 37 body mass index among US adults, 1999-2010. *JAMA* 2012;307(5):491-7.  
54  
55 38 48. Lakerveld J, Mackenbach J. The upstream determinants of adult obesity. *Obes Facts*  
56 39 2017;10(3):216-22. doi: 10.1159/000471489  
57  
58 40 49. Wells JC. Toward body composition reference data for infants, children, and adolescents.  
59 41 *Adv Nutr* 2014;5(3):320S-9S. doi: 10.3945/an.113.005371

- 1  
2  
3 1 50. Powell-Wiley TM, Poirier P, Burke LE, et al. Obesity and cardiovascular disease: A scientific  
4 2 statement from the American Heart Association. *Circulation* 2021;143(21):e984-e1010. doi:  
5 3 10.1161/CIR.0000000000000973  
6  
7 4 51. Quetelet L. A Treatise on Man and the Development of his Faculties. Cambridge:  
8 5 Cambridge University Press 2013.  
9  
10 6 52. VanItallie TB, Yang MU, Heymsfield SB, et al. Height-normalized indices of the body's fat-  
11 7 free mass and fat mass: potentially useful indicators of nutritional status. *Am J Clin Nutr*  
12 8 1990;52(6):953-9. doi: 10.1093/ajcn/52.6.953  
13  
14 9 53. Kyle UG, Schutz Y, Dupertuis YM, et al. Body composition interpretation. Contributions of  
15 10 the fat-free mass index and the body fat mass index. *Nutrition* 2003;19(7-8):597-604. doi:  
16 11 10.1016/s0899-9007(03)00061-3  
17  
18 12 54. Goran MI, Allison DB, Poehlman ET. Issues relating to normalization of body fat content in  
19 13 men and women. *Int J Obes Relat Metab Disord* 1995;19(9):638-43.  
20  
21 14 55. Prado CM, Wells JC, Smith SR, et al. Sarcopenic obesity: A Critical appraisal of the current  
22 15 evidence. *Clin Nutr* 2012;31(5):583-601. doi: 10.1016/j.clnu.2012.06.010  
23  
24 16 56. Deurenberg P, Yap M, van Staveren WA. Body mass index and percent body fat: a meta  
25 17 analysis among different ethnic groups. *Int J Obes Relat Metab Disord* 1998;22(12):1164-71.  
26  
27 18 57. Parra-Soto S, Cowley ES, Rezende LFM, et al. Associations of six adiposity-related markers  
28 19 with incidence and mortality from 24 cancers-findings from the UK Biobank prospective cohort  
29 20 study. *BMC Med* 2021;19(1):7. doi: 10.1186/s12916-020-01848-8  
30  
31 21 58. Auyeung TW, Lee JS, Leung J, et al. Survival in older men may benefit from being slightly  
32 22 overweight and centrally obese--a 5-year follow-up study in 4,000 older adults using DXA. *J*  
33 23 *Gerontol A Biol Sci Med Sci* 2010;65(1):99-104. doi: 10.1093/gerona/glp099  
34  
35 24 59. Rolland Y, Gallini A, Cristini C, et al. Body-composition predictors of mortality in women  
36 25 aged  $\geq 75$  y: data from a large population-based cohort study with a 17-y follow-up. *Am J Clin*  
37 26 *Nutr* 2014;100(5):1352-60. doi: 10.3945/ajcn.114.086728  
38  
39 27 60. Jeong SM, Lee DH, Rezende LFM, et al. Different correlation of body mass index with body  
40 28 fatness and obesity-related biomarker according to age, sex and race-ethnicity. *Sci Rep*  
41 29 2023;13(1):3472. doi: 10.1038/s41598-023-30527-w  
42  
43 30 61. Suthahar N, Wang K, Zwartkruis VW, et al. Associations of relative fat mass, a new index of  
44 31 adiposity, with type-2 diabetes in the general population. *Eur J Intern Med* 2023;109:73-78. doi:  
45 32 10.1016/j.ejim.2022.12.024  
46  
47 33 62. Suthahar N, Meems LMG, Withaar C, et al. Relative fat mass, a new index of adiposity, is  
48 34 strongly associated with incident heart failure: data from PREVEND. *Scientific Reports*  
49 35 2022;12(1):147. doi: 10.1038/s41598-021-02409-6  
50  
51 36 63. Tutor AW, Lavie CJ, Kachur S, et al. Updates on obesity and the obesity paradox in  
52 37 cardiovascular diseases. *Prog Cardiovasc Dis* 2022 doi: 10.1016/j.pcad.2022.11.013  
53  
54 38 64. Porter SA, Massaro JM, Hoffmann U, et al. Abdominal subcutaneous adipose tissue: a  
55 39 protective fat depot? *Diabetes Care* 2009;32(6):1068-75. doi: 10.2337/dc08-2280  
56  
57 40 65. Fox CS, Massaro JM, Hoffmann U, et al. Abdominal visceral and subcutaneous adipose  
58 41 tissue compartments: association with metabolic risk factors in the Framingham Heart Study.  
59 42 *Circulation* 2007;116(1):39-48. doi: 10.1161/CIRCULATIONAHA.106.675355

- 1  
2  
3 1 66. CDC. National Diabetes Statistics Report. Estimates of diabetes and its burden in the United  
4 2 States. <https://www.cdc.gov/diabetes/data/statistics-report/index.html> [Accessed April 2, 2023].  
5  
6 3 67. Caraballo C, Herrin J, Mahajan S, et al. Temporal trends in racial and ethnic disparities in  
7 4 multimorbidity prevalence in the United States, 1999-2018. *Am J Med* 2022;135(9):1083-92  
8 5 e14. doi: 10.1016/j.amjmed.2022.04.010  
9  
10 6 68. Tian YE, Cropley V, Maier AB, et al. Heterogeneous aging across multiple organ systems  
11 7 and prediction of chronic disease and mortality. *Nat Med* 2023 doi: 10.1038/s41591-023-02296-  
12 8 6  
13 9 69. Schwartz RS. Obesity in the elderly: Prevalence, consequences, and treatment. In: Bray  
14 GA, Bouchard C, eds. Handbook of obesity Etiology and pathophysiology. Second edition ed.  
15 10 New York: Marcel Dekker, Inc. 2004:135-48.  
16 11  
17 12 70. de Santana FM, Domiciano DS, Goncalves MA, et al. Association of appendicular lean  
18 13 mass, and subcutaneous and visceral adipose tissue with mortality in older Brazilians: The Sao  
19 14 Paulo Ageing & Health Study. *J Bone Miner Res* 2019;34(7):1264-74. doi: 10.1002/jbmr.3710  
20  
21 15 71. Lee JS, Auyeung TW, Kwok T, et al. Survival benefit of abdominal adiposity: a 6-year follow-  
22 16 up study with Dual X-ray absorptiometry in 3,978 older adults. *Age (Dordr)* 2012;34(3):597-608.  
23 17 doi: 10.1007/s11357-011-9272-y  
24  
25 18 72. Chen Y, Zhang XP, Yuan J, et al. Association of body mass index and age with incident  
26 19 diabetes in Chinese adults: a population-based cohort study. *BMJ Open* 2018;8(9):e021768.  
27 20 doi: 10.1136/bmjopen-2018-021768  
28  
29 21 73. Lind L, Sundstrom J, Arnlov J, et al. Impact of aging on the strength of cardiovascular risk  
30 22 factors: A longitudinal study over 40 years. *J Am Heart Assoc* 2018;7(1) doi:  
31 23 10.1161/JAHA.117.007061  
32  
33 24 74. Masaki KH, Curb JD, Chiu D, et al. Association of body mass index with blood pressure in  
34 25 elderly Japanese American men. The Honolulu Heart Program. *Hypertension* 1997;29(2):673-7.  
35 26 doi: 10.1161/01.hyp.29.2.673  
36  
37 27 75. Tromp J, Paniagua SMA, Lau ES, et al. Age dependent associations of risk factors with  
38 28 heart failure: pooled population based cohort study. *BMJ* 2021;372:n461. doi: 10.1136/bmj.n461  
39  
40 29 76. Chang SH, Beason TS, Hunleth JM, et al. A systematic review of body fat distribution and  
41 30 mortality in older people. *Maturitas* 2012;72(3):175-91. doi: 10.1016/j.maturitas.2012.04.004  
42 31 [published Online First: 2012/05/19]  
43  
44 32 77. Edston E. A correlation between the weight of visceral adipose tissue and selected  
45 33 anthropometric indices: an autopsy study. *Clin Obes* 2013;3(3-4):84-9. doi: 10.1111/cob.12021  
46  
47 34 78. Conway JM, Chanetsa FF, Wang P. Intraabdominal adipose tissue and anthropometric  
48 35 surrogates in African American women with upper- and lower-body obesity. *Am J Clin Nutr*  
49 36 1997;66(6):1345-51. doi: 10.1093/ajcn/66.6.1345  
50  
51 37 79. Bosy-Westphal A, Muller MJ. Identification of skeletal muscle mass depletion across age  
52 38 and BMI groups in health and disease--there is need for a unified definition. *Int J Obes (Lond)*  
53 39 2015;39(3):379-86. doi: 10.1038/ijo.2014.161  
54  
55 40 80. Allison DB, Zhu SK, Plankey M, et al. Differential associations of body mass index and  
56 41 adiposity with all-cause mortality among men in the first and second National Health and  
57 42 Nutrition Examination Surveys (NHANES I and NHANES II) follow-up studies. *Int J Obes Relat*  
58 43 *Metab Disord* 2002;26(3):410-6. doi: 10.1038/sj.ijo.0801925

- 1  
2  
3 1 81. Zhu S, Heo M, Plankey M, et al. Associations of body mass index and anthropometric  
4 2 indicators of fat mass and fat free mass with all-cause mortality among women in the first and  
5 3 second National Health and Nutrition Examination Surveys follow-up studies. *Ann Epidemiol*  
6 4 2003;13(4):286-93. doi: 10.1016/s1047-2797(02)00417-9  
7  
8 5 82. Heymsfield SB, Gonzalez MC, Shen W, et al. Weight loss composition is one-fourth fat-free  
9 6 mass: a critical review and critique of this widely cited rule. *Obes Rev* 2014;15(4):310-21. doi:  
10 7 10.1111/obr.12143  
11  
12 8 83. Spahillari A, Mukamal KJ, DeFilippi C, et al. The association of lean and fat mass with all-  
13 9 cause mortality in older adults: The Cardiovascular Health Study. *Nutr Metab Cardiovasc Dis*  
14 10 2016;26(11):1039-47. doi: 10.1016/j.numecd.2016.06.011  
15  
16 11 84. Bosy-Westphal A, Müller MJ. Diagnosis of obesity based on body composition-associated  
17 12 health risks-Time for a change in paradigm. *Obes Rev* 2021;22 Suppl 2:e13190. doi:  
18 13 10.1111/obr.13190  
19  
20 14 85. Flegal KM. Use and misuse of BMI categories. *AMA J Ethics* 2023;25(7):E550-58.  
21  
22 15 86. Lee CD, Blair SN, Jackson AS. Cardiorespiratory fitness, body composition, and all-cause  
23 16 and cardiovascular disease mortality in men. *Am J Clin Nutr* 1999;69(3):373-80. doi:  
24 17 10.1093/ajcn/69.3.373  
25  
26 18 87. Lobman TG, Houtkooper L, Going SB. Body Fat Measurement Goes High-Tech: Not All Are  
27 19 Created Equal. *ACSM's Health & Fitness Journal* 1997;1(1):30-35.  
28  
29 20 88. Wells JC, Fewtrell MS. Measuring body composition. *Arch Dis Child* 2006;91(7):612-7. doi:  
30 21 10.1136/adc.2005.085522  
31  
32 22 89. Clasey JL, Kanaley JA, Wideman L, et al. Validity of methods of body composition  
33 23 assessment in young and older men and women. *J Appl Physiol (1985)* 1999;86(5):1728-38.  
34  
35 24 90. Brodersen J, Schwartz LM, Heneghan C, et al. Overdiagnosis: what it is and what it isn't.  
36 25 *BMJ Evid Based Med* 2018;23(1):1-3. doi: 10.1136/ebmed-2017-110886  
37  
38 26 91. Puhl RM, Heuer CA. Obesity stigma: important considerations for public health. *Am J Public*  
39 27 *Health* 2010;100(6):1019-28. doi: 10.2105/AJPH.2009.159491  
40  
41  
42  
43  
44  
45  
46  
47  
48  
49  
50  
51  
52  
53  
54  
55  
56  
57  
58  
59  
60



## 1 **FIGURE LEGENDS**

2 **Figure 1. Age-adjusted U.S. adult prevalence temporal trends in RFM-defined obesity by**  
3 **sex: 1999-2000 through 2017-March 2020.** Trend lines were smoothed using the Lowes  
4 method on weighted prevalence estimates. Body fat-defined obesity was determined using the  
5 relative fat mass (RFM). RFM was calculated as follows:  $RFM = 64 - (20 \times \text{height/waist}$   
6  $\text{circumference}) + (12 \times \text{sex})$ ; sex equals 0 for men and 1 for women. Obesity was diagnosed if  
7 RFM was 40% or higher for women and RFM was 30% or higher for men.

8 **Figure 2. Age-adjusted U.S. adult prevalence temporal trends in RFM-defined obesity by**  
9 **ethnicity: 1999-2000 through 2017-March 2020.** Trend lines were smoothed using the Lowes  
10 method on weighted prevalence estimates. The relative fat mass (RFM) was calculated as  
11 follows:  $RFM = 64 - (20 \times \text{height/waist circumference}) + (12 \times \text{sex})$ ; sex equals 0 for men and 1  
12 for women. Obesity was diagnosed if RFM was 40% or higher for women and RFM was 30% or  
13 higher for men.

14 **Figure 3. Age-adjusted U.S. adult prevalence temporal trends in RFM-defined obesity by**  
15 **age group: 1999-2000 through 2017-March 2020.** Trend lines were smoothed using the  
16 Lowes method on weighted prevalence estimates. The relative fat mass (RFM) was calculated  
17 as follows:  $RFM = 64 - (20 \times \text{height/waist circumference}) + (12 \times \text{sex})$ ; sex equals 0 for men  
18 and 1 for women. Obesity was diagnosed if RFM was 40% or higher for women and RFM was  
19 30% or higher for men.



Figure 1. Age-adjusted U.S. adult prevalence trends in RFM-defined obesity by sex: 1999-2000 through 2017-March 2020.

762x228mm (96 x 96 DPI)

1  
2  
3  
4  
5  
6  
7  
8  
9  
10  
11  
12  
13  
14  
15  
16  
17  
18  
19  
20  
21  
22  
23  
24  
25  
26  
27  
28  
29  
30  
31  
32  
33  
34  
35  
36  
37  
38  
39  
40  
41  
42  
43  
44  
45  
46  
47  
48  
49  
50  
51  
52  
53  
54  
55  
56  
57  
58  
59  
60

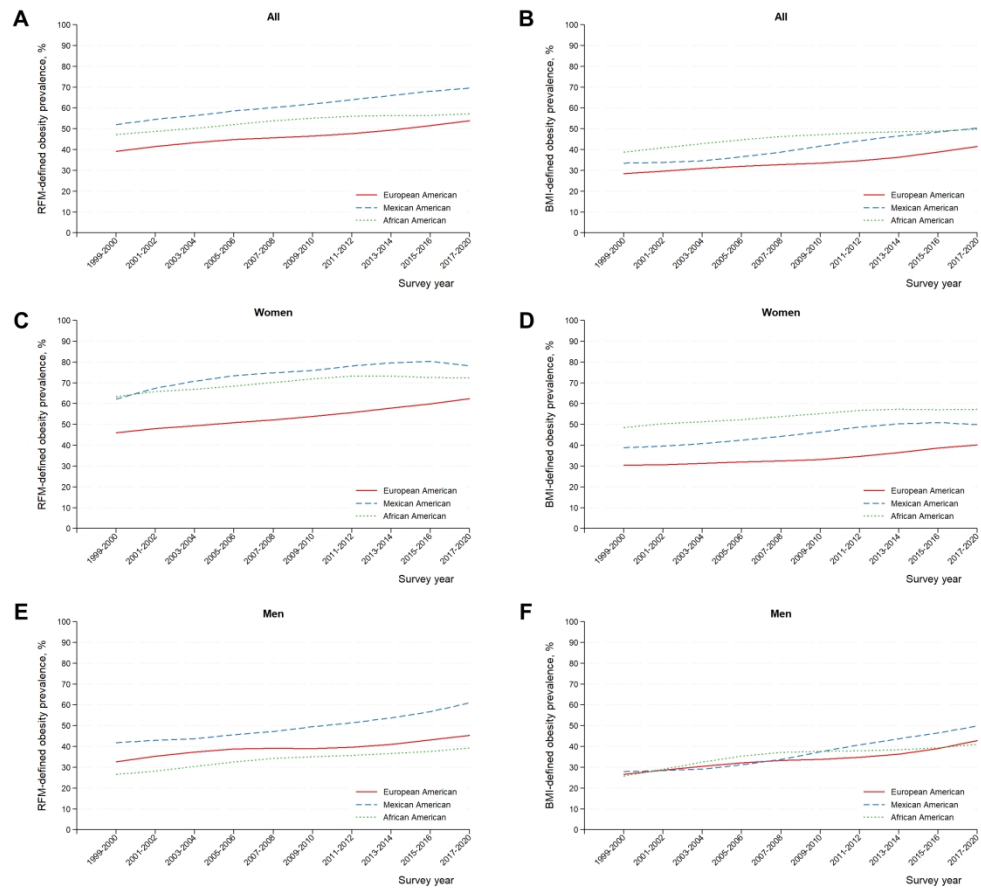

Figure 2. Age-adjusted U.S. adult prevalence trends in RFM-defined obesity by ethnicity: 1999-2000 through 2017-March 2020.

762x711mm (96 x 96 DPI)



Figure 3. Age-adjusted U.S. adult prevalence trends in RFM-defined obesity by age group: 1999-2000 through 2017-March 2020.

762x711mm (96 x 96 DPI)

## Supplemental material

### Temporal trends in obesity defined by the relative fat mass (RFM) index among adults in the United States from 1999 to 2020: population-based study

Orison O. Woolcott<sup>1,2,\*</sup>, Till Seuring<sup>3</sup>

*<sup>1</sup>Ronin Institute, Montclair, NJ, USA; <sup>2</sup>Institute for Globally Distributed Open Research and Education (IGDORE), Los Angeles, CA, USA; <sup>3</sup>Luxembourg Institute of Socio-Economic Research (LISER), Esch-sur-Alzette, Luxembourg*

**Supplemental Table 1.** Prevalence of general and abdominal obesity among study participants by sex and ethnicity.\*

|                                   | <b>Mexican American</b> | <b>European American</b> | <b>African American</b> |
|-----------------------------------|-------------------------|--------------------------|-------------------------|
| <b>Women</b>                      | n=4,204                 | n=9,710                  | n=5,417                 |
| RFM-defined obesity, % (95% CI) † | 72.7 (70.3-75.1)        | 56.6 (55.2-58.0)         | 69.9 (68.3-71.4)        |
| BMI-defined obesity, % (95% CI) ‡ | 45.5 (43.2-47.9)        | 35.4 (34.0-36.7)         | 54.5 (52.9-56.1)        |
| Abdominal obesity, % (95% CI) §   | 71.5 (69.2-73.8)        | 62.8 (61.4-64.1)         | 75.0 (73.6-76.3)        |
| <b>Men</b>                        | n=4,212                 | n=9,981                  | n=5,256                 |
| RFM-defined obesity, % (95% CI) † | 47.0 (44.9-49.1)        | 41.7 (40.3-43.2)         | 33.7 (32.1-35.3)        |
| BMI-defined obesity, % (95% CI) ‡ | 38.4 (36.3-40.4)        | 35.0 (33.6-36.5)         | 35.9 (34.2-37.6)        |
| Abdominal obesity, % (95% CI) §   | 41.2 (39.1-43.2)        | 47.6 (46.2-49.1)         | 37.5 (35.9-39.0)        |

\* Sample size represents unweighted data. Estimates represent weighted data.

BMI, body mass index; CI, confidence interval; IQR, interquartile range; RFM, relative fat mass; SD, standard deviation.

† Defined as an RFM  $\geq 40\%$  for women and  $\geq 30\%$  for men. Estimates are not adjusted for age.

‡ Defined as a BMI  $\geq 30$  kg/m<sup>2</sup>. Estimates are not adjusted for age.

§ Defined as a waist circumference  $>88$  cm for women and  $>102$  cm for men, according to the recommendations of the National Cholesterol Education Program (NCEP) Expert Panel on Detection, Evaluation, and Treatment of High Blood Cholesterol in Adults (Adult Treatment Panel III). Estimates are not adjusted for age.

1  
2  
3  
4  
5  
6  
7  
8  
9  
10  
11  
12  
13  
14  
15  
16  
17  
18  
19  
20  
21  
22  
23  
24  
25  
26  
27  
28  
29  
30  
31  
32  
33  
34  
35  
36  
37  
38  
39  
40  
41  
42  
43  
44  
45  
46  
47  
48  
49  
50  
51  
52  
53  
54  
55  
56  
57  
58  
59  
60

| Characteristic          | All†          | With complete data | With missing data |
|-------------------------|---------------|--------------------|-------------------|
| Sample size, n (%)      | 50,283 (100)  | 47,667 (95.6)      | 2,616 (4.4)       |
| Median age (IQR), years | 45 (33-58)    | 45 (33-58)         | 47 (34-63)        |
| Male sex, n (%)         | 24,954 (49.2) | 23,736 (49.4)      | 1,218 (45.4)      |
| Ethnicity, n (%)        |               |                    |                   |
| Mexican American        | 8,827 (8.3)   | 8,416 (8.3)        | 411 (8.6)         |
| European American       | 20,618 (66.9) | 19,691 (67.2)      | 927 (58.6)        |
| African American        | 11,433 (11.4) | 10,673 (11.2)      | 760 (16.7)        |
| Other/multi-racial      | 9,405 (13.4)  | 8,887 (13.2)       | 518 (16.1)        |

\* Sample size represents unweighted data. Estimates represent weighted data.  
† This group includes participants with complete data and participants with missing data on body weight (n=666), height (n=596), and waist circumference (n=2,340).

**Supplemental Table 3.** Age-adjusted U.S. adult prevalence temporal trends in RFM-defined obesity by ethnicity: 1999-2000 through 2017-March 2020.\*

|                         | RFM-defined obesity |                   |                  | BMI-defined obesity |                   |                  |
|-------------------------|---------------------|-------------------|------------------|---------------------|-------------------|------------------|
|                         | Mexican American    | European American | African American | Mexican American    | European American | African American |
| <b>All participants</b> | n=8,416             | n=19,691          | n=10,673         | n=8,416             | n=19,691          | n=10,673         |
| Prevalence, % (95% CI)  |                     |                   |                  |                     |                   |                  |
| 1999-2000               | 53.1 (48.5-57.7)    | 39.4 (34.2-44.6)  | 48.3 (45.0-51.7) | 34.7 (28.9-40.6)    | 28.3 (23.9-32.7)  | 39.8 (35.7-43.8) |
| 2001-2002               | 52.1 (47.1-57.1)    | 41.0 (38.9-43.1)  | 46.0 (42.9-49.0) | 30.7 (26.7-34.7)    | 29.8 (27.0-32.6)  | 38.3 (34.4-42.3) |
| 2003-2004               | 60.1 (55.2-65.0)    | 44.8 (41.0-48.6)  | 52.7 (49.4-56.0) | 36.9 (32.2-41.6)    | 30.6 (27.7-33.4)  | 45.1 (39.7-50.5) |
| 2005-2006               | 55.4 (51.8-58.9)    | 44.9 (40.7-49.2)  | 51.5 (47.9-55.1) | 33.8 (31.2-36.4)    | 33.1 (29.2-36.9)  | 45.9 (42.3-49.5) |
| 2007-2008               | 62.2 (56.2-68.2)    | 45.7 (41.5-49.9)  | 52.5 (49.1-56.0) | 39.9 (33.8-46.1)    | 32.4 (28.7-36.0)  | 43.7 (39.2-48.1) |
| 2009-2010               | 61.5 (59.4-63.6)    | 46.4 (43.0-49.8)  | 56.8 (51.8-61.8) | 40.5 (36.7-44.4)    | 34.2 (31.1-37.2)  | 49.4 (44.2-54.5) |
| 2011-2012               | 63.6 (58.6-68.6)    | 46.8 (42.8-50.9)  | 57.4 (54.8-60.0) | 46.1 (41.3-50.8)    | 33.0 (29.4-36.5)  | 48.4 (44.6-52.3) |
| 2013-2014               | 65.0 (61.2-68.9)    | 49.4 (46.6-52.3)  | 55.0 (50.0-59.9) | 46.1 (41.0-51.2)    | 36.6 (33.6-39.5)  | 47.9 (43.7-52.0) |
| 2015-2016               | 70.3 (67.0-73.5)    | 51.2 (46.9-55.4)  | 56.6 (52.0-61.2) | 48.7 (44.3-53.1)    | 38.5 (34.5-42.5)  | 48.7 (43.8-53.5) |
| 2017-2020               | 68.8 (64.5-73.1)    | 54.1 (50.8-57.4)  | 57.1 (54.4-59.8) | 50.2 (46.8-53.5)    | 41.7 (37.7-45.6)  | 49.9 (47.2-52.6) |
| Prevalence change†      | 15.7 (9.6-21.7)     | 14.7 (8.8-20.5)   | 8.7 (4.6-12.9)   | 15.4 (9.0-21.9)     | 13.4 (7.7-19)     | 10.2 (5.5-14.8)  |
| P for non-linearity‡    | 0.58                | 0.97              | 0.25             | 0.52                | 0.10              | 0.35             |
| P value for trend‡      | <0.001              | <0.001            | <0.001           | <0.001              | <0.001            | <0.001           |
| <b>Women</b>            | n=4,204             | n=9,710           | n=5,417          | n=4,204             | n=9,710           | n=5,417          |
| Prevalence, % (95% CI)  |                     |                   |                  |                     |                   |                  |
| 1999-2000               | 62.8 (55.1-70.5)    | 46.2 (40.2-52.1)  | 64.2 (59.6-68.8) | 39.8 (31.1-48.5)    | 30.3 (25.2-35.3)  | 49.2 (42.5-56.0) |
| 2001-2002               | 66.4 (58.6-74.3)    | 47.8 (44.2-51.4)  | 64.2 (59.0-69.4) | 37.0 (30.2-43.8)    | 31.1 (27.6-34.7)  | 48.7 (42.8-54.7) |
| 2003-2004               | 75.0 (68.3-81.6)    | 50.6 (43.9-57.2)  | 70.7 (65.5-75.8) | 42.7 (36.0-49.3)    | 30.3 (25.7-34.8)  | 53.9 (46.3-61.5) |
| 2005-2006               | 72.0 (66.4-77.5)    | 49.9 (45.6-54.2)  | 66.2 (60.9-71.5) | 41.3 (34.8-47.7)    | 32.8 (28.3-37.3)  | 52.7 (48.5-56.9) |
| 2007-2008               | 74.8 (71.2-78.4)    | 52.3 (47.5-57.2)  | 67.9 (63.2-72.6) | 44.7 (38.8-50.6)    | 32.8 (28.7-36.9)  | 49.2 (45.2-53.3) |
| 2009-2010               | 77.8 (74.8-80.9)    | 53.4 (49.5-57.2)  | 74.6 (68.6-80.7) | 45.7 (42.0-49.3)    | 32.1 (29.0-35.3)  | 58.5 (52.0-64.9) |
| 2011-2012               | 74.6 (66.2-83.0)    | 56.3 (51.4-61.3)  | 74.9 (72.1-77.8) | 49.0 (40.4-57.5)    | 33.3 (28.0-38.7)  | 57.9 (53.5-62.3) |
| 2013-2014               | 81.2 (74.7-87.6)    | 57.3 (53.4-61.2)  | 72.5 (68.8-76.2) | 51.7 (45.2-58.3)    | 37.6 (33.7-41.6)  | 56.7 (53.1-60.3) |
| 2015-2016               | 84.6 (79.7-89.5)    | 60.0 (56.2-63.8)  | 72.3 (68.3-76.4) | 52.2 (48.4-56.1)    | 38.5 (34.0-43.0)  | 57.1 (52.6-61.5) |
| 2017-2020               | 76.9 (70.8-83.1)    | 62.3 (59.0-65.7)  | 72.4 (68.6-76.2) | 49.6 (43.1-56.0)    | 40.3 (36.4-44.2)  | 57.3 (53.7-60.9) |
| Prevalence change†      | 14.1 (4.7-23.6)     | 16.2 (9.7-22.7)   | 8.3 (2.5-14.0)   | 9.8 (-0.6-20.1)     | 10.0 (3.9-16.1)   | 8.1 (0.8-15.4)   |
| P for non-linearity§    | 0.026               | 0.77              | 0.34             | 0.76                | 0.12              | 0.71             |
| P value for trend§      | <0.001              | <0.001            | <0.001           | <0.001              | <0.001            | <0.001           |
| <b>Men</b>              | n=4,212             | n=9,981           | n=5,256          | n=4,212             | n=9,981           | n=5,256          |
| Prevalence, % (95% CI)  |                     |                   |                  |                     |                   |                  |
| 1999-2000               | 42.9 (39.4-46.5)    | 33.2 (28.6-37.7)  | 27.5 (23.1-31.9) | 29.1 (24.6-33.6)    | 26.8 (22.9-30.6)  | 26.8 (23.0-30.6) |
| 2001-2002               | 40.6 (34.7-46.4)    | 34.1 (30.9-37.4)  | 25.8 (21.4-30.1) | 25.9 (21.9-29.9)    | 28.3 (25.3-31.4)  | 26.5 (22.8-30.1) |
| 2003-2004               | 47.1 (39.3-54.8)    | 38.9 (35.5-42.4)  | 31.2 (27.2-35.2) | 31.7 (25.0-38.3)    | 30.9 (27.0-34.7)  | 34.2 (27.7-40.7) |
| 2005-2006               | 40.8 (34.1-47.4)    | 40.0 (35.1-44.9)  | 34.1 (28.3-39.9) | 27.4 (22.7-32.1)    | 33.3 (28.7-37.9)  | 37.2 (31.2-43.2) |
| 2007-2008               | 50.9 (43.3-58.4)    | 38.8 (34.7-42.9)  | 33.8 (28.8-38.9) | 35.1 (28.0-42.1)    | 32.0 (27.9-36.0)  | 36.9 (31.0-42.7) |
| 2009-2010               | 47.8 (44.6-51.0)    | 39.4 (34.6-44.3)  | 35.4 (31.4-39.5) | 36.3 (30.9-41.6)    | 36.1 (30.8-41.3)  | 38.6 (33.1-44.0) |
| 2011-2012               | 52.5 (45.6-59.4)    | 37.6 (34.3-40.9)  | 36.4 (32.3-40.5) | 42.7 (36.0-49.5)    | 32.5 (29.7-35.3)  | 37.5 (32.8-42.2) |
| 2013-2014               | 52.4 (48.6-56.3)    | 41.7 (38.1-45.3)  | 35.2 (28.6-41.8) | 43.6 (38.2-49.1)    | 35.6 (31.6-39.5)  | 37.9 (32.5-43.4) |
| 2015-2016               | 55.9 (50.9-60.8)    | 42.3 (36.5-48.1)  | 38.1 (31.9-44.2) | 45.3 (38.5-52.1)    | 38.4 (32.5-44.3)  | 38.9 (33.5-44.2) |
| 2017-2020               | 61.2 (55.8-66.6)    | 45.8 (40.3-51.2)  | 39.1 (35.4-42.8) | 50.3 (46.1-54.5)    | 43.1 (36.9-49.2)  | 41.2 (36.7-45.7) |
| Prevalence change†      | 18.3 (12.0-24.5)    | 12.6 (5.7-19.5)   | 11.6 (6.1-17.1)  | 21.2 (15.3-27.1)    | 16.3 (9.3-23.3)   | 14.4 (8.7-20.1)  |
| P for non-linearity§    | 0.21                | 0.80              | 0.50             | 0.24                | 0.45              | 0.08             |
| P value for trend§      | <0.001              | <0.001            | <0.001           | <0.001              | <0.001            | <0.001           |

\* Prevalence estimates represent weighted data. The relative fat mass (RFM) was calculated as follows:  $RFM = 64 - (20 \times \text{height/waist circumference}) + (12 \times \text{sex})$ ; sex equals 0 for men and 1 for women. Obesity was diagnosed if RFM was 40% or higher for women and RFM was 30% or higher for men. CI denotes confidence interval.  
† Absolute difference (prevalence in 2017-2020 minus the prevalence in 1999-2000).  
‡ Adjusted for age and sex.  
§ Adjusted for age.



**Supplemental Table 4.** Age-adjusted U.S. adult prevalence temporal trends in RFM-defined obesity by age group: 1999-2000 through 2017-March 2020.\*

|                         | RFM-defined obesity |                  |                  | BMI-defined obesity |                  |                  |
|-------------------------|---------------------|------------------|------------------|---------------------|------------------|------------------|
|                         | 20-39 years old     | 40-59 years old  | 60-79 years old  | 20-39 years old     | 40-59 years old  | 60-79 years old  |
| <b>All participants</b> | n=16,747            | n=16,912         | n=14,008         | n=16,747            | n=16,912         | n=14,008         |
| Prevalence, 95% CI      |                     |                  |                  |                     |                  |                  |
| 1999-2000               | 29.0 (24.5-33.6)    | 46.9 (40.5-53.4) | 61.8 (58.1-65.6) | 25.4 (21.5-29.3)    | 33.2 (26.9-39.4) | 35.4 (31.3-39.5) |
| 2001-2002               | 30.2 (27.2-33.1)    | 45.0 (42.2-47.8) | 63.8 (61.3-66.3) | 25.3 (22.4-28.1)    | 33.2 (29.9-36.4) | 33.7 (30.7-36.8) |
| 2003-2004               | 34.2 (31.2-37.1)    | 51.2 (47.8-54.6) | 65.8 (62.5-69.0) | 28.1 (24.6-31.7)    | 35.9 (32.1-39.7) | 33.0 (29.4-36.5) |
| 2005-2006               | 32.6 (28.7-36.5)    | 53.2 (47.9-58.5) | 66.0 (62.2-69.8) | 28.5 (24.1-32.9)    | 40.1 (35.6-44.6) | 34.9 (31.5-38.3) |
| 2007-2008               | 35.5 (31.1-39.9)    | 51.6 (48.5-54.7) | 66.1 (62.4-69.8) | 30.2 (26.2-34.3)    | 35.7 (32.4-39.1) | 37.4 (33.8-40.9) |
| 2009-2010               | 37.2 (32.8-41.6)    | 50.5 (47.7-53.4) | 68.5 (65.2-71.8) | 32.5 (28.7-36.3)    | 36.0 (33.9-38.2) | 41.8 (38.0-45.7) |
| 2011-2012               | 37.7 (33.1-42.3)    | 53.6 (49.9-57.3) | 68.0 (62.9-73.1) | 30.4 (26.2-34.5)    | 39.3 (36.1-42.5) | 38.3 (33.8-42.9) |
| 2013-2014               | 40.0 (36.2-43.9)    | 54.5 (50.3-58.7) | 68.8 (64.6-73.0) | 34.4 (31.3-37.5)    | 40.6 (36.2-45.1) | 39.3 (35.2-43.5) |
| 2015-2016               | 43.0 (39.0-47.0)    | 57.1 (50.6-63.6) | 69.8 (64.7-74.9) | 36.0 (32.2-39.8)    | 42.8 (37.5-48.2) | 42.8 (37.5-48.2) |
| 2017-2020               | 44.6 (40.5-48.6)    | 59.4 (56.2-62.7) | 70.6 (67.2-74.0) | 39.8 (35.6-44.0)    | 44.3 (41.2-47.4) | 42.7 (39.1-46.3) |
| Prevalence change†      | 15.5 (9.7-21.3)     | 12.5 (5.6-19.4)  | 8.8 (3.9-13.6)   | 14.5 (8.9-20.0)     | 11.2 (4.5-17.8)  | 7.3 (2.0-12.5)   |
| P for non-linearity‡    | 0.65                | 0.94             | 0.25             | 0.48                | 0.21             | 0.46             |
| P value for trend‡      | <0.001              | <0.001           | <0.001           | <0.001              | <0.001           | <0.001           |
| <b>Women</b>            | n=8,295             | n=8,684          | n=6,952          | n=8,295             | n=8,684          | n=6,952          |
| Prevalence, 95% CI      |                     |                  |                  |                     |                  |                  |
| 1999-2000               | 36.9 (30.9-42.9)    | 56.2 (48.9-63.5) | 67.7 (63.3-72.2) | 28.7 (23.6-33.7)    | 37.4 (30.2-44.5) | 37.4 (31.6-43.2) |
| 2001-2002               | 39.9 (35.3-44.5)    | 52.9 (48.1-57.6) | 72.0 (69.3-74.7) | 28.9 (24.1-33.6)    | 35.0 (30.2-39.8) | 36.6 (32.0-41.2) |
| 2003-2004               | 42.0 (35.8-48.2)    | 59.7 (54.9-64.5) | 73.0 (68.3-77.7) | 29.0 (23.8-34.1)    | 38.1 (32.3-43.9) | 33.6 (28.5-38.7) |
| 2005-2006               | 40.3 (35.3-45.4)    | 58.7 (53.5-63.8) | 71.3 (66.4-76.2) | 29.2 (24.1-34.3)    | 40.7 (35.9-45.6) | 34.8 (28.4-41.2) |
| 2007-2008               | 46.1 (40.4-51.7)    | 60.0 (56.2-63.8) | 69.8 (64.5-75.1) | 33.0 (27.3-38.6)    | 37.6 (32.6-42.5) | 36.0 (30.0-41.9) |
| 2009-2010               | 46.4 (40.6-52.2)    | 59.3 (55.5-63.1) | 78.5 (75.8-81.3) | 31.8 (28.2-35.4)    | 35.5 (31.7-39.3) | 45.1 (40.7-49.5) |
| 2011-2012               | 47.6 (42.1-53.1)    | 64.6 (60.1-69.0) | 76.7 (69.8-83.5) | 31.9 (28.0-35.9)    | 39.4 (35.1-43.6) | 42.1 (34.4-49.7) |
| 2013-2014               | 50.8 (46.6-55.1)    | 63.3 (58.1-68.5) | 78.0 (74.6-81.4) | 36.6 (33.9-39.3)    | 43.6 (38.2-48.9) | 40.2 (34.1-46.2) |
| 2015-2016               | 53.3 (48.9-57.8)    | 69.1 (62.7-75.5) | 77.1 (70.6-83.6) | 37.1 (33.5-40.7)    | 44.8 (38.4-51.1) | 45.0 (37.3-52.8) |
| 2017-2020               | 53.3 (48.5-58.0)    | 67.9 (63.6-72.3) | 81.0 (76.4-85.6) | 39.9 (35.3-44.4)    | 42.8 (38.9-46.7) | 45.4 (40.9-49.8) |
| Prevalence change†      | 16.4 (9.1-23.7)     | 11.7 (3.6-19.9)  | 13.3 (7.1-19.5)  | 11.2 (4.7-17.7)     | 5.5 (-2.3-13.2)  | 8.0 (1.0-15.0)   |
| P for non-linearity§    | 0.16                | 0.39             | 0.99             | 0.44                | 0.42             | 0.97             |
| P value for trend§      | <0.001              | <0.001           | <0.001           | <0.001              | <0.001           | <0.001           |
| <b>Men</b>              | n=8,452             | n=8,228          | n=7,056          | n=8,452             | n=8,228          | n=7,056          |
| Prevalence, 95% CI      |                     |                  |                  |                     |                  |                  |
| 1999-2000               | 22.4 (18.0-26.8)    | 36.8 (30.4-43.2) | 54.7 (49.9-59.5) | 22.7 (18.3-27.0)    | 28.8 (22.8-34.8) | 33.2 (28.2-38.1) |
| 2001-2002               | 20.8 (17.4-24.1)    | 37.1 (33.5-40.7) | 53.5 (49.8-57.1) | 21.7 (18.5-24.9)    | 31.2 (28.0-34.5) | 30.4 (26.0-34.8) |
| 2003-2004               | 26.9 (23.3-30.4)    | 42.3 (36.7-47.9) | 57.2 (52.5-62.0) | 27.4 (22.5-32.3)    | 33.6 (28.4-38.9) | 32.3 (27.4-37.2) |
| 2005-2006               | 25.4 (20.1-30.7)    | 47.4 (40.5-54.2) | 59.8 (54.8-64.7) | 27.6 (22.0-33.1)    | 39.5 (33.1-45.9) | 34.7 (29.9-39.5) |
| 2007-2008               | 25.4 (21.2-29.5)    | 42.8 (37.8-47.8) | 61.8 (57.7-65.9) | 27.6 (23.8-31.4)    | 33.7 (28.8-38.5) | 39.2 (34.8-43.5) |
| 2009-2010               | 28.5 (23.6-33.3)    | 41.6 (37.7-45.5) | 56.9 (51.1-62.7) | 33.2 (27.2-39.2)    | 36.6 (33.0-40.2) | 37.5 (32.3-42.8) |
| 2011-2012               | 28.4 (23.9-33.0)    | 42.3 (38.0-46.6) | 58.1 (52.1-64.2) | 28.9 (23.5-34.2)    | 39.1 (35.6-42.5) | 34.2 (29.2-39.2) |
| 2013-2014               | 30.0 (25.5-34.5)    | 45.5 (40.3-50.7) | 58.6 (51.6-65.5) | 32.5 (28.1-36.8)    | 37.7 (32.2-43.3) | 38.6 (30.7-46.4) |
| 2015-2016               | 33.1 (28.3-38.0)    | 44.5 (36.5-52.6) | 61.4 (55.4-67.5) | 35.0 (29.0-41.0)    | 40.8 (34.6-47.1) | 40.2 (34.9-45.5) |
| 2017-2020               | 35.9 (30.2-41.5)    | 50.8 (46.2-55.4) | 58.8 (54.3-63.3) | 39.5 (33.1-46.0)    | 45.8 (41.1-50.6) | 39.7 (34.0-45.4) |
| Prevalence change†      | 13.4 (6.5-20.4)     | 14.0 (6.4-21.6)  | 4.1 (-2.3-10.5)  | 16.8 (9.3-24.4)     | 17.0 (9.7-24.4)  | 6.5 (-0.7-13.8)  |
| P for non-linearity§    | 0.47                | 0.42             | 0.16             | 0.97                | 0.41             | 0.24             |
| P value for trend§      | <0.001              | <0.001           | <0.001           | <0.001              | <0.001           | <0.001           |

\* Prevalence estimates represent weighted data. The relative fat mass (RFM) was calculated as follows:  $RFM = 64 - (20 \times \text{height/waist circumference}) + (12 \times \text{sex})$ ; sex equals 0 for men and 1 for women. Obesity was diagnosed if RFM was 40% or higher for women and RFM was 30% or higher for men. CI denotes confidence interval.  
† Absolute difference (prevalence in 2017-2020 minus the prevalence in 1999-2000).  
‡ Adjusted for sex and ethnicity.  
§ Adjusted for ethnicity.

**NHANES 1999-March 2020**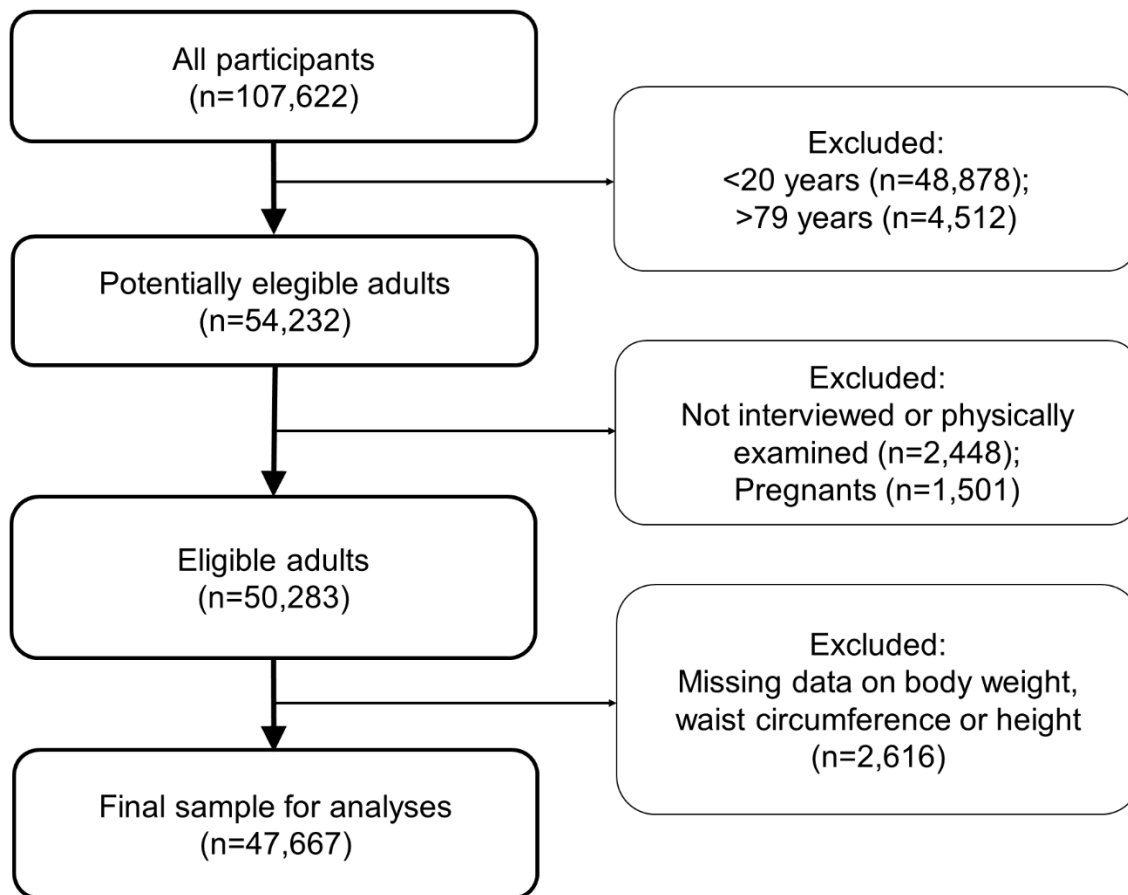**Supplemental Figure 1.** Selection of study participants.

## STROBE Statement—checklist of items that should be included in reports of observational studies

|                              | Item No | Recommendation                                                                                                                                                                                                                                                                                                                                                                                                                                                         | Page No |
|------------------------------|---------|------------------------------------------------------------------------------------------------------------------------------------------------------------------------------------------------------------------------------------------------------------------------------------------------------------------------------------------------------------------------------------------------------------------------------------------------------------------------|---------|
| <b>Title and abstract</b>    | 1       | (a) Indicate the study's design with a commonly used term in the title or the abstract                                                                                                                                                                                                                                                                                                                                                                                 | 1       |
|                              |         | (b) Provide in the abstract an informative and balanced summary of what was done and what was found                                                                                                                                                                                                                                                                                                                                                                    | 3-4     |
| <b>Introduction</b>          |         |                                                                                                                                                                                                                                                                                                                                                                                                                                                                        |         |
| Background/rationale         | 2       | Explain the scientific background and rationale for the investigation being reported                                                                                                                                                                                                                                                                                                                                                                                   | 6-7     |
| Objectives                   | 3       | State specific objectives, including any prespecified hypotheses                                                                                                                                                                                                                                                                                                                                                                                                       | 7       |
| <b>Methods</b>               |         |                                                                                                                                                                                                                                                                                                                                                                                                                                                                        |         |
| Study design                 | 4       | Present key elements of study design early in the paper                                                                                                                                                                                                                                                                                                                                                                                                                | 8       |
| Setting                      | 5       | Describe the setting, locations, and relevant dates, including periods of recruitment, exposure, follow-up, and data collection                                                                                                                                                                                                                                                                                                                                        | 8       |
| Participants                 | 6       | (a) <i>Cohort study</i> —Give the eligibility criteria, and the sources and methods of selection of participants. Describe methods of follow-up<br><i>Case-control study</i> —Give the eligibility criteria, and the sources and methods of case ascertainment and control selection. Give the rationale for the choice of cases and controls<br><i>Cross-sectional study</i> —Give the eligibility criteria, and the sources and methods of selection of participants | 8, 10   |
|                              |         | (b) <i>Cohort study</i> —For matched studies, give matching criteria and number of exposed and unexposed<br><i>Case-control study</i> —For matched studies, give matching criteria and the number of controls per case                                                                                                                                                                                                                                                 | NA      |
| Variables                    | 7       | Clearly define all outcomes, exposures, predictors, potential confounders, and effect modifiers. Give diagnostic criteria, if applicable                                                                                                                                                                                                                                                                                                                               | 9-10    |
| Data sources/<br>measurement | 8*      | For each variable of interest, give sources of data and details of methods of assessment (measurement). Describe comparability of assessment methods if there is more than one group                                                                                                                                                                                                                                                                                   | 8-10    |
| Bias                         | 9       | Describe any efforts to address potential sources of bias                                                                                                                                                                                                                                                                                                                                                                                                              | 9-10    |
| Study size                   | 10      | Explain how the study size was arrived at                                                                                                                                                                                                                                                                                                                                                                                                                              | 8       |
| Quantitative variables       | 11      | Explain how quantitative variables were handled in the analyses. If applicable, describe which groupings were chosen and why                                                                                                                                                                                                                                                                                                                                           | 9-10    |
| Statistical methods          | 12      | (a) Describe all statistical methods, including those used to control for confounding                                                                                                                                                                                                                                                                                                                                                                                  | 9-10    |
|                              |         | (b) Describe any methods used to examine subgroups and interactions                                                                                                                                                                                                                                                                                                                                                                                                    | 9-10    |
|                              |         | (c) Explain how missing data were addressed                                                                                                                                                                                                                                                                                                                                                                                                                            | 8       |
|                              |         | (d) <i>Cohort study</i> —If applicable, explain how loss to follow-up was addressed<br><i>Case-control study</i> —If applicable, explain how matching of cases and controls was addressed<br><i>Cross-sectional study</i> —If applicable, describe analytical methods taking account of sampling strategy                                                                                                                                                              | 9-10    |
|                              |         | (e) Describe any sensitivity analyses                                                                                                                                                                                                                                                                                                                                                                                                                                  | 10      |

Continued on next page

| <b>Results</b>           |     |                                                                                                                                                                                                              |               |
|--------------------------|-----|--------------------------------------------------------------------------------------------------------------------------------------------------------------------------------------------------------------|---------------|
| Participants             | 13* | (a) Report numbers of individuals at each stage of study—eg numbers potentially eligible, examined for eligibility, confirmed eligible, included in the study, completing follow-up, and analysed            | 11            |
|                          |     | (b) Give reasons for non-participation at each stage                                                                                                                                                         | 11            |
|                          |     | (c) Consider use of a flow diagram                                                                                                                                                                           | Suppl Fig 1   |
| Descriptive data         | 14* | (a) Give characteristics of study participants (eg demographic, clinical, social) and information on exposures and potential confounders                                                                     | 11            |
|                          |     | (b) Indicate number of participants with missing data for each variable of interest                                                                                                                          | Suppl Table 1 |
|                          |     | (c) <i>Cohort study</i> —Summarise follow-up time (eg, average and total amount)                                                                                                                             | NA            |
| Outcome data             | 15* | <i>Cohort study</i> —Report numbers of outcome events or summary measures over time                                                                                                                          | NA            |
|                          |     | <i>Case-control study</i> —Report numbers in each exposure category, or summary measures of exposure                                                                                                         | NA            |
|                          |     | <i>Cross-sectional study</i> —Report numbers of outcome events or summary measures                                                                                                                           | 11-18         |
| Main results             | 16  | (a) Give unadjusted estimates and, if applicable, confounder-adjusted estimates and their precision (eg, 95% confidence interval). Make clear which confounders were adjusted for and why they were included | NA            |
|                          |     | (b) Report category boundaries when continuous variables were categorized                                                                                                                                    | 12-18         |
|                          |     | (c) If relevant, consider translating estimates of relative risk into absolute risk for a meaningful time period                                                                                             | NA            |
| Other analyses           | 17  | Report other analyses done—eg analyses of subgroups and interactions, and sensitivity analyses                                                                                                               | 11-18         |
| <b>Discussion</b>        |     |                                                                                                                                                                                                              |               |
| Key results              | 18  | Summarise key results with reference to study objectives                                                                                                                                                     | 19            |
| Limitations              | 19  | Discuss limitations of the study, taking into account sources of potential bias or imprecision. Discuss both direction and magnitude of any potential bias                                                   | 23-24         |
| Interpretation           | 20  | Give a cautious overall interpretation of results considering objectives, limitations, multiplicity of analyses, results from similar studies, and other relevant evidence                                   | 24            |
| Generalisability         | 21  | Discuss the generalisability (external validity) of the study results                                                                                                                                        | 24            |
| <b>Other information</b> |     |                                                                                                                                                                                                              |               |
| Funding                  | 22  | Give the source of funding and the role of the funders for the present study and, if applicable, for the original study on which the present article is based                                                | 26            |

\*Give information separately for cases and controls in case-control studies and, if applicable, for exposed and unexposed groups in cohort and cross-sectional studies.

**Note:** An Explanation and Elaboration article discusses each checklist item and gives methodological background and published examples of transparent reporting. The STROBE checklist is best used in conjunction with this article (freely available on the Web sites of PLoS Medicine at <http://www.plosmedicine.org/>, Annals of Internal Medicine at <http://www.annals.org/>, and Epidemiology at <http://www.epidem.com/>). Information on the STROBE Initiative is available at [www.strobe-statement.org](http://www.strobe-statement.org).
