# Supplementary material for: Temporal trends in obesity defined by the relative fat mass (RFM) index among adults in the United States from 1999 to 2020: a population-based study
Source: PubMed Central journal article supplement — BMJ Open. 2023 Aug 17;13(8):e071295. doi: 10.1136/bmjopen-2022-071295 (PMC10441088; doi:10.1136/bmjopen-2022-071295), 2023-08-17
Supplement: bmjopen-2022-071295supp001.pdf [file bmjopen-2022-071295supp001.pdf]

## Supplemental material

### **Temporal trends in obesity defined by the relative fat mass (RFM) index among adults in the United States from 1999 to 2020: a population-based study**

Orison O. Woolcott<sup>1,2,\*</sup>, Till Seuring<sup>3</sup>

<sup>1</sup>*Ronin Institute, Montclair, New Jersey, USA;* <sup>2</sup>*Institute for Globally Distributed Open Research and Education (IGDORE), Los Angeles, California, USA;* <sup>3</sup>*Luxembourg Institute of Socio-Economic Research (LISER), Esch-sur-Alzette, Luxembourg*

| <b>Supplemental Table 1.</b> Prevalence of general and abdominal obesity among study participants by sex and ethnicity.*                                                                                                                                                                                                                                                                                                                                                                                                                                                                                                                                                                                                                                                                                                                                     |                         |                          |                         |
|--------------------------------------------------------------------------------------------------------------------------------------------------------------------------------------------------------------------------------------------------------------------------------------------------------------------------------------------------------------------------------------------------------------------------------------------------------------------------------------------------------------------------------------------------------------------------------------------------------------------------------------------------------------------------------------------------------------------------------------------------------------------------------------------------------------------------------------------------------------|-------------------------|--------------------------|-------------------------|
|                                                                                                                                                                                                                                                                                                                                                                                                                                                                                                                                                                                                                                                                                                                                                                                                                                                              | <b>Mexican American</b> | <b>European American</b> | <b>African American</b> |
| <b>Women</b>                                                                                                                                                                                                                                                                                                                                                                                                                                                                                                                                                                                                                                                                                                                                                                                                                                                 | n=4,204                 | n=9,710                  | n=5,417                 |
| RFM-defined obesity, % (95% CI) †                                                                                                                                                                                                                                                                                                                                                                                                                                                                                                                                                                                                                                                                                                                                                                                                                            | 72.7 (70.3-75.1)        | 56.6 (55.2-58.0)         | 69.9 (68.3-71.4)        |
| BMI-defined obesity, % (95% CI) ‡                                                                                                                                                                                                                                                                                                                                                                                                                                                                                                                                                                                                                                                                                                                                                                                                                            | 45.5 (43.2-47.9)        | 35.4 (34.0-36.7)         | 54.5 (52.9-56.1)        |
| Abdominal obesity, % (95% CI) §                                                                                                                                                                                                                                                                                                                                                                                                                                                                                                                                                                                                                                                                                                                                                                                                                              | 71.5 (69.2-73.8)        | 62.8 (61.4-64.1)         | 75.0 (73.6-76.3)        |
| <b>Men</b>                                                                                                                                                                                                                                                                                                                                                                                                                                                                                                                                                                                                                                                                                                                                                                                                                                                   | n=4,212                 | n=9,981                  | n=5,256                 |
| RFM-defined obesity, % (95% CI) †                                                                                                                                                                                                                                                                                                                                                                                                                                                                                                                                                                                                                                                                                                                                                                                                                            | 47.0 (44.9-49.1)        | 41.7 (40.3-43.2)         | 33.7 (32.1-35.3)        |
| BMI-defined obesity, % (95% CI) ‡                                                                                                                                                                                                                                                                                                                                                                                                                                                                                                                                                                                                                                                                                                                                                                                                                            | 38.4 (36.3-40.4)        | 35.0 (33.6-36.5)         | 35.9 (34.2-37.6)        |
| Abdominal obesity, % (95% CI) §                                                                                                                                                                                                                                                                                                                                                                                                                                                                                                                                                                                                                                                                                                                                                                                                                              | 41.2 (39.1-43.2)        | 47.6 (46.2-49.1)         | 37.5 (35.9-39.0)        |
| <p>* Sample size represents unweighted data. Estimates represent weighted data.<br/>           BMI, body mass index; CI, confidence interval; IQR, interquartile range; RFM, relative fat mass; SD, standard deviation.<br/>           † Defined as an RFM <math>\geq 40\%</math> for women and <math>\geq 30\%</math> for men. Estimates are not adjusted for age.<br/>           ‡ Defined as a BMI <math>\geq 30</math> kg/m<sup>2</sup>. Estimates are not adjusted for age.<br/>           § Defined as a waist circumference <math>&gt;88</math> cm for women and <math>&gt;102</math> cm for men, according to the recommendations of the National Cholesterol Education Program (NCEP) Expert Panel on Detection, Evaluation, and Treatment of High Blood Cholesterol in Adults (Adult Treatment Panel III). Estimates are not adjusted for age.</p> |                         |                          |                         |

| <b>Supplemental Table 2.</b> Characteristics of study participants with missing data.*                                                                                                                                                                       |               |                           |                          |
|--------------------------------------------------------------------------------------------------------------------------------------------------------------------------------------------------------------------------------------------------------------|---------------|---------------------------|--------------------------|
| <b>Characteristic</b>                                                                                                                                                                                                                                        | <b>All†</b>   | <b>With complete data</b> | <b>With missing data</b> |
| Sample size, n (%)                                                                                                                                                                                                                                           | 50,283 (100)  | 47,667 (95.6)             | 2,616 (4.4)              |
| Median age (IQR), years                                                                                                                                                                                                                                      | 45 (33-58)    | 45 (33-58)                | 47 (34-63)               |
| Male sex, n (%)                                                                                                                                                                                                                                              | 24,954 (49.2) | 23,736 (49.4)             | 1,218 (45.4)             |
| Ethnicity, n (%)                                                                                                                                                                                                                                             |               |                           |                          |
| Mexican American                                                                                                                                                                                                                                             | 8,827 (8.3)   | 8,416 (8.3)               | 411 (8.6)                |
| European American                                                                                                                                                                                                                                            | 20,618 (66.9) | 19,691(67.2)              | 927 (58.6)               |
| African American                                                                                                                                                                                                                                             | 11,433 (11.4) | 10,673(11.2)              | 760 (16.7)               |
| Other/multi-racial                                                                                                                                                                                                                                           | 9,405 (13.4)  | 8,887 (13.2)              | 518 (16.1)               |
| <p>* Sample size represents unweighted data. Estimates represent weighted data.<br/> † This group includes participants with complete data and participants with missing data on body weight (n=666), height (n=596), and waist circumference (n=2,340).</p> |               |                           |                          |

**Supplemental Table 3.** Age-adjusted U.S. adult prevalence temporal trends in RFM-defined obesity by ethnicity: 1999-2000 through 2017-March 2020.\*

|                         | RFM-defined obesity |                   |                  | BMI-defined obesity |                   |                  |
|-------------------------|---------------------|-------------------|------------------|---------------------|-------------------|------------------|
|                         | Mexican American    | European American | African American | Mexican American    | European American | African American |
| <b>All participants</b> | n=8,416             | n=19,691          | n=10,673         | n=8,416             | n=19,691          | n=10,673         |
| Prevalence, % (95% CI)  |                     |                   |                  |                     |                   |                  |
| 1999-2000               | 53.1 (48.5-57.7)    | 39.4 (34.2-44.6)  | 48.3 (45.0-51.7) | 34.7 (28.9-40.6)    | 28.3 (23.9-32.7)  | 39.8 (35.7-43.8) |
| 2001-2002               | 52.1 (47.1-57.1)    | 41.0 (38.9-43.1)  | 46.0 (42.9-49.0) | 30.7 (26.7-34.7)    | 29.8 (27.0-32.6)  | 38.3 (34.4-42.3) |
| 2003-2004               | 60.1 (55.2-65.0)    | 44.8 (41.0-48.6)  | 52.7 (49.4-56.0) | 36.9 (32.2-41.6)    | 30.6 (27.7-33.4)  | 45.1 (39.7-50.5) |
| 2005-2006               | 55.4 (51.8-58.9)    | 44.9 (40.7-49.2)  | 51.5 (47.9-55.1) | 33.8 (31.2-36.4)    | 33.1 (29.2-36.9)  | 45.9 (42.3-49.5) |
| 2007-2008               | 62.2 (56.2-68.2)    | 45.7 (41.5-49.9)  | 52.5 (49.1-56.0) | 39.9 (33.8-46.1)    | 32.4 (28.7-36.0)  | 43.7 (39.2-48.1) |
| 2009-2010               | 61.5 (59.4-63.6)    | 46.4 (43.0-49.8)  | 56.8 (51.8-61.8) | 40.5 (36.7-44.4)    | 34.2 (31.1-37.2)  | 49.4 (44.2-54.5) |
| 2011-2012               | 63.6 (58.6-68.6)    | 46.8 (42.8-50.9)  | 57.4 (54.8-60.0) | 46.1 (41.3-50.8)    | 33.0 (29.4-36.5)  | 48.4 (44.6-52.3) |
| 2013-2014               | 65.0 (61.2-68.9)    | 49.4 (46.6-52.3)  | 55.0 (50.0-59.9) | 46.1 (41.0-51.2)    | 36.6 (33.6-39.5)  | 47.9 (43.7-52.0) |
| 2015-2016               | 70.3 (67.0-73.5)    | 51.2 (46.9-55.4)  | 56.6 (52.0-61.2) | 48.7 (44.3-53.1)    | 38.5 (34.5-42.5)  | 48.7 (43.8-53.5) |
| 2017-2020               | 68.8 (64.5-73.1)    | 54.1 (50.8-57.4)  | 57.1 (54.4-59.8) | 50.2 (46.8-53.5)    | 41.7 (37.7-45.6)  | 49.9 (47.2-52.6) |
| Prevalence change†      | 15.7 (9.6-21.7)     | 14.7 (8.8-20.5)   | 8.7 (4.6-12.9)   | 15.4 (9.0-21.9)     | 13.4 (7.7-19)     | 10.2 (5.5-14.8)  |
| P for non-linearity‡    | 0.58                | 0.97              | 0.25             | 0.52                | 0.10              | 0.35             |
| P value for trend‡      | <0.001              | <0.001            | <0.001           | <0.001              | <0.001            | <0.001           |
| <b>Women</b>            | n=4,204             | n=9,710           | n=5,417          | n=4,204             | n=9,710           | n=5,417          |
| Prevalence, % (95% CI)  |                     |                   |                  |                     |                   |                  |
| 1999-2000               | 62.8 (55.1-70.5)    | 46.2 (40.2-52.1)  | 64.2 (59.6-68.8) | 39.8 (31.1-48.5)    | 30.3 (25.2-35.3)  | 49.2 (42.5-56.0) |
| 2001-2002               | 66.4 (58.6-74.3)    | 47.8 (44.2-51.4)  | 64.2 (59.0-69.4) | 37.0 (30.2-43.8)    | 31.1 (27.6-34.7)  | 48.7 (42.8-54.7) |
| 2003-2004               | 75.0 (68.3-81.6)    | 50.6 (43.9-57.2)  | 70.7 (65.5-75.8) | 42.7 (36.0-49.3)    | 30.3 (25.7-34.8)  | 53.9 (46.3-61.5) |
| 2005-2006               | 72.0 (66.4-77.5)    | 49.9 (45.6-54.2)  | 66.2 (60.9-71.5) | 41.3 (34.8-47.7)    | 32.8 (28.3-37.3)  | 52.7 (48.5-56.9) |
| 2007-2008               | 74.8 (71.2-78.4)    | 52.3 (47.5-57.2)  | 67.9 (63.2-72.6) | 44.7 (38.8-50.6)    | 32.8 (28.7-36.9)  | 49.2 (45.2-53.3) |
| 2009-2010               | 77.8 (74.8-80.9)    | 53.4 (49.5-57.2)  | 74.6 (68.6-80.7) | 45.7 (42.0-49.3)    | 32.1 (29.0-35.3)  | 58.5 (52.0-64.9) |
| 2011-2012               | 74.6 (66.2-83.0)    | 56.3 (51.4-61.3)  | 74.9 (72.1-77.8) | 49.0 (40.4-57.5)    | 33.3 (28.0-38.7)  | 57.9 (53.5-62.3) |
| 2013-2014               | 81.2 (74.7-87.6)    | 57.3 (53.4-61.2)  | 72.5 (68.8-76.2) | 51.7 (45.2-58.3)    | 37.6 (33.7-41.6)  | 56.7 (53.1-60.3) |
| 2015-2016               | 84.6 (79.7-89.5)    | 60.0 (56.2-63.8)  | 72.3 (68.3-76.4) | 52.2 (48.4-56.1)    | 38.5 (34.0-43.0)  | 57.1 (52.6-61.5) |
| 2017-2020               | 76.9 (70.8-83.1)    | 62.3 (59.0-65.7)  | 72.4 (68.6-76.2) | 49.6 (43.1-56.0)    | 40.3 (36.4-44.2)  | 57.3 (53.7-60.9) |
| Prevalence change†      | 14.1 (4.7-23.6)     | 16.2 (9.7-22.7)   | 8.3 (2.5-14.0)   | 9.8 (-0.6-20.1)     | 10.0 (3.9-16.1)   | 8.1 (0.8-15.4)   |
| P for non-linearity‡    | 0.026               | 0.77              | 0.34             | 0.76                | 0.12              | 0.71             |
| P value for trend‡      | <0.001              | <0.001            | <0.001           | <0.001              | <0.001            | <0.001           |
| <b>Men</b>              | n=4,212             | n=9,981           | n=5,256          | n=4,212             | n=9,981           | n=5,256          |
| Prevalence, % (95% CI)  |                     |                   |                  |                     |                   |                  |
| 1999-2000               | 42.9 (39.4-46.5)    | 33.2 (28.6-37.7)  | 27.5 (23.1-31.9) | 29.1 (24.6-33.6)    | 26.8 (22.9-30.6)  | 26.8 (23.0-30.6) |
| 2001-2002               | 40.6 (34.7-46.4)    | 34.1 (30.9-37.4)  | 25.8 (21.4-30.1) | 25.9 (21.9-29.9)    | 28.3 (25.3-31.4)  | 26.5 (22.8-30.1) |
| 2003-2004               | 47.1 (39.3-54.8)    | 38.9 (35.5-42.4)  | 31.2 (27.2-35.2) | 31.7 (25.0-38.3)    | 30.9 (27.0-34.7)  | 34.2 (27.7-40.7) |
| 2005-2006               | 40.8 (34.1-47.4)    | 40.0 (35.1-44.9)  | 34.1 (28.3-39.9) | 27.4 (22.7-32.1)    | 33.3 (28.7-37.9)  | 37.2 (31.2-43.2) |
| 2007-2008               | 50.9 (43.3-58.4)    | 38.8 (34.7-42.9)  | 33.8 (28.8-38.9) | 35.1 (28.0-42.1)    | 32.0 (27.9-36.0)  | 36.9 (31.0-42.7) |
| 2009-2010               | 47.8 (44.6-51.0)    | 39.4 (34.6-44.3)  | 35.4 (31.4-39.5) | 36.3 (30.9-41.6)    | 36.1 (30.8-41.3)  | 38.6 (33.1-44.0) |
| 2011-2012               | 52.5 (45.6-59.4)    | 37.6 (34.3-40.9)  | 36.4 (32.3-40.5) | 42.7 (36.0-49.5)    | 32.5 (29.7-35.3)  | 37.5 (32.8-42.2) |
| 2013-2014               | 52.4 (48.6-56.3)    | 41.7 (38.1-45.3)  | 35.2 (28.6-41.8) | 43.6 (38.2-49.1)    | 35.6 (31.6-39.5)  | 37.9 (32.5-43.4) |
| 2015-2016               | 55.9 (50.9-60.8)    | 42.3 (36.5-48.1)  | 38.1 (31.9-44.2) | 45.3 (38.5-52.1)    | 38.4 (32.5-44.3)  | 38.9 (33.5-44.2) |
| 2017-2020               | 61.2 (55.8-66.6)    | 45.8 (40.3-51.2)  | 39.1 (35.4-42.8) | 50.3 (46.1-54.5)    | 43.1 (36.9-49.2)  | 41.2 (36.7-45.7) |
| Prevalence change†      | 18.3 (12.0-24.5)    | 12.6 (5.7-19.5)   | 11.6 (6.1-17.1)  | 21.2 (15.3-27.1)    | 16.3 (9.3-23.3)   | 14.4 (8.7-20.1)  |
| P for non-linearity‡    | 0.21                | 0.80              | 0.50             | 0.24                | 0.45              | 0.08             |
| P value for trend‡      | <0.001              | <0.001            | <0.001           | <0.001              | <0.001            | <0.001           |

\* Prevalence estimates represent weighted data. The relative fat mass (RFM) was calculated as follows: RFM = 64 - (20 × height/waist circumference) + (12 × sex); sex equals 0 for men and 1 for women. Obesity was diagnosed if RFM was 40% or higher for women and RFM was 30% or higher for men. CI denotes confidence interval.  
† Absolute difference (prevalence in 2017-2020 minus the prevalence in 1999-2000).  
‡ Adjusted for age and sex.  
§ Adjusted for age.

**Supplemental Table 4.** Age-adjusted U.S. adult prevalence temporal trends in RFM-defined obesity by age group: 1999-2000 through 2017-March 2020.\*

|                         | RFM-defined obesity         |                             |                             | BMI-defined obesity         |                             |                             |
|-------------------------|-----------------------------|-----------------------------|-----------------------------|-----------------------------|-----------------------------|-----------------------------|
|                         | 20-39 years old<br>n=16,747 | 40-59 years old<br>n=16,912 | 60-79 years old<br>n=14,008 | 20-39 years old<br>n=16,747 | 40-59 years old<br>n=16,912 | 60-79 years old<br>n=14,008 |
| <b>All participants</b> |                             |                             |                             |                             |                             |                             |
| Prevalence, 95% CI      |                             |                             |                             |                             |                             |                             |
| 1999-2000               | 29.0 (24.5-33.6)            | 46.9 (40.5-53.4)            | 61.8 (58.1-65.6)            | 25.4 (21.5-29.3)            | 33.2 (26.9-39.4)            | 35.4 (31.3-39.5)            |
| 2001-2002               | 30.2 (27.2-33.1)            | 45.0 (42.2-47.8)            | 63.8 (61.3-66.3)            | 25.3 (22.4-28.1)            | 33.2 (29.9-36.4)            | 33.7 (30.7-36.8)            |
| 2003-2004               | 34.2 (31.2-37.1)            | 51.2 (47.8-54.6)            | 65.8 (62.5-69.0)            | 28.1 (24.6-31.7)            | 35.9 (32.1-39.7)            | 33.0 (29.4-36.5)            |
| 2005-2006               | 32.6 (28.7-36.5)            | 53.2 (47.9-58.5)            | 66.0 (62.2-69.8)            | 28.5 (24.1-32.9)            | 40.1 (35.6-44.6)            | 34.9 (31.5-38.3)            |
| 2007-2008               | 35.5 (31.1-39.9)            | 51.6 (48.5-54.7)            | 66.1 (62.4-69.8)            | 30.2 (26.2-34.3)            | 35.7 (32.4-39.1)            | 37.4 (33.8-40.9)            |
| 2009-2010               | 37.2 (32.8-41.6)            | 50.5 (47.7-53.4)            | 68.5 (65.2-71.8)            | 32.5 (28.7-36.3)            | 36.0 (33.9-38.2)            | 41.8 (38.0-45.7)            |
| 2011-2012               | 37.7 (33.1-42.3)            | 53.6 (49.9-57.3)            | 68.0 (62.9-73.1)            | 30.4 (26.2-34.5)            | 39.3 (36.1-42.5)            | 38.3 (33.8-42.9)            |
| 2013-2014               | 40.0 (36.2-43.9)            | 54.5 (50.3-58.7)            | 68.8 (64.6-73.0)            | 34.4 (31.3-37.5)            | 40.6 (36.2-45.1)            | 39.3 (35.2-43.5)            |
| 2015-2016               | 43.0 (39.0-47.0)            | 57.1 (50.6-63.6)            | 69.8 (64.7-74.9)            | 36.0 (32.2-39.8)            | 42.8 (37.5-48.2)            | 42.8 (37.5-48.2)            |
| 2017-2020               | 44.6 (40.5-48.6)            | 59.4 (56.2-62.7)            | 70.6 (67.2-74.0)            | 39.8 (35.6-44.0)            | 44.3 (41.2-47.4)            | 42.7 (39.1-46.3)            |
| Prevalence change†      | 15.5 (9.7-21.3)             | 12.5 (5.6-19.4)             | 8.8 (3.9-13.6)              | 14.5 (8.9-20.0)             | 11.2 (4.5-17.8)             | 7.3 (2.0-12.5)              |
| P for non-linearity‡    | 0.65                        | 0.94                        | 0.25                        | 0.48                        | 0.21                        | 0.46                        |
| P value for trend§      | <0.001                      | <0.001                      | <0.001                      | <0.001                      | <0.001                      | <0.001                      |
| <b>Women</b>            | n=8,295                     | n=8,684                     | n=6,952                     | n=8,295                     | n=8,684                     | n=6,952                     |
| Prevalence, 95% CI      |                             |                             |                             |                             |                             |                             |
| 1999-2000               | 36.9 (30.9-42.9)            | 56.2 (48.9-63.5)            | 67.7 (63.3-72.2)            | 28.7 (23.6-33.7)            | 37.4 (30.2-44.5)            | 37.4 (31.6-43.2)            |
| 2001-2002               | 39.9 (35.3-44.5)            | 52.9 (48.1-57.6)            | 72.0 (69.3-74.7)            | 28.9 (24.1-33.6)            | 35.0 (30.2-39.8)            | 36.6 (32.0-41.2)            |
| 2003-2004               | 42.0 (35.8-48.2)            | 59.7 (54.9-64.5)            | 73.0 (68.3-77.7)            | 29.0 (23.8-34.1)            | 38.1 (32.3-43.9)            | 33.6 (28.5-38.7)            |
| 2005-2006               | 40.3 (35.3-45.4)            | 58.7 (53.5-63.8)            | 71.3 (66.4-76.2)            | 29.2 (24.1-34.3)            | 40.7 (35.9-45.6)            | 34.8 (28.4-41.2)            |
| 2007-2008               | 46.1 (40.4-51.7)            | 60.0 (56.2-63.8)            | 69.8 (64.5-75.1)            | 33.0 (27.3-38.6)            | 37.6 (32.6-42.5)            | 36.0 (30.0-41.9)            |
| 2009-2010               | 46.4 (40.6-52.2)            | 59.3 (55.5-63.1)            | 78.5 (75.8-81.3)            | 31.8 (28.2-35.4)            | 35.5 (31.7-39.3)            | 45.1 (40.7-49.5)            |
| 2011-2012               | 47.6 (42.1-53.1)            | 64.6 (60.1-69.0)            | 76.7 (69.8-83.5)            | 31.9 (28.0-35.9)            | 39.4 (35.1-43.6)            | 42.1 (34.4-49.7)            |
| 2013-2014               | 50.8 (46.6-55.1)            | 63.3 (58.1-68.5)            | 78.0 (74.6-81.4)            | 36.6 (33.9-39.3)            | 43.6 (38.2-48.9)            | 40.2 (34.1-46.2)            |
| 2015-2016               | 53.3 (48.9-57.8)            | 69.1 (62.7-75.5)            | 77.1 (70.6-83.6)            | 37.1 (33.5-40.7)            | 44.8 (38.4-51.1)            | 45.0 (37.3-52.8)            |
| 2017-2020               | 53.3 (48.5-58.0)            | 67.9 (63.6-72.3)            | 81.0 (76.4-85.6)            | 39.9 (35.3-44.4)            | 42.8 (38.9-46.7)            | 45.4 (40.9-49.8)            |
| Prevalence change†      | 16.4 (9.1-23.7)             | 11.7 (3.6-19.9)             | 13.3 (7.1-19.5)             | 11.2 (4.7-17.7)             | 5.5 (-2.3-13.2)             | 8.0 (1.0-15.0)              |
| P for non-linearity‡    | 0.16                        | 0.39                        | 0.99                        | 0.44                        | 0.42                        | 0.97                        |
| P value for trend§      | <0.001                      | <0.001                      | <0.001                      | <0.001                      | <0.001                      | <0.001                      |
| <b>Men</b>              | n=8,452                     | n=8,228                     | n=7,056                     | n=8,452                     | n=8,228                     | n=7,056                     |
| Prevalence, 95% CI      |                             |                             |                             |                             |                             |                             |
| 1999-2000               | 22.4 (18.0-26.8)            | 36.8 (30.4-43.2)            | 54.7 (49.9-59.5)            | 22.7 (18.3-27.0)            | 28.8 (22.8-34.8)            | 33.2 (28.2-38.1)            |
| 2001-2002               | 20.8 (17.4-24.1)            | 37.1 (33.5-40.7)            | 53.5 (49.8-57.1)            | 21.7 (18.5-24.9)            | 31.2 (28.0-34.5)            | 30.4 (26.0-34.8)            |
| 2003-2004               | 26.9 (23.3-30.4)            | 42.3 (36.7-47.9)            | 57.2 (52.5-62.0)            | 27.4 (22.5-32.3)            | 33.6 (28.4-38.9)            | 32.3 (27.4-37.2)            |
| 2005-2006               | 25.4 (20.1-30.7)            | 47.4 (40.5-54.2)            | 59.8 (54.8-64.7)            | 27.6 (22.0-33.1)            | 39.5 (33.1-45.9)            | 34.7 (29.9-39.5)            |
| 2007-2008               | 25.4 (21.2-29.5)            | 42.8 (37.8-47.8)            | 61.8 (57.7-65.9)            | 27.6 (23.8-31.4)            | 33.7 (28.8-38.5)            | 39.2 (34.8-43.5)            |
| 2009-2010               | 28.5 (23.6-33.3)            | 41.6 (37.7-45.5)            | 56.9 (51.1-62.7)            | 33.2 (27.2-39.2)            | 36.6 (33.0-40.2)            | 37.5 (32.3-42.8)            |
| 2011-2012               | 28.4 (23.9-33.0)            | 42.3 (38.0-46.6)            | 58.1 (52.1-64.2)            | 28.9 (23.5-34.2)            | 39.1 (35.6-42.5)            | 34.2 (29.2-39.2)            |
| 2013-2014               | 30.0 (25.5-34.5)            | 45.5 (40.3-50.7)            | 58.6 (51.6-65.5)            | 32.5 (28.1-36.8)            | 37.7 (32.2-43.3)            | 38.6 (30.7-46.4)            |
| 2015-2016               | 33.1 (28.3-38.0)            | 44.5 (36.5-52.6)            | 61.4 (55.4-67.5)            | 35.0 (29.0-41.0)            | 40.8 (34.6-47.1)            | 40.2 (34.9-45.5)            |
| 2017-2020               | 35.9 (30.2-41.5)            | 50.8 (46.2-55.4)            | 58.8 (54.3-63.3)            | 39.5 (33.1-46.0)            | 45.8 (41.1-50.6)            | 39.7 (34.0-45.4)            |
| Prevalence change†      | 13.4 (6.5-20.4)             | 14.0 (6.4-21.6)             | 4.1 (-2.3-10.5)             | 16.8 (9.3-24.4)             | 17.0 (9.7-24.4)             | 6.5 (-0.7-13.8)             |
| P for non-linearity‡    | 0.47                        | 0.42                        | 0.16                        | 0.97                        | 0.41                        | 0.24                        |
| P value for trend§      | <0.001                      | <0.001                      | <0.001                      | <0.001                      | <0.001                      | <0.001                      |

\* Prevalence estimates represent weighted data. The relative fat mass (RFM) was calculated as follows: RFM = 64 - (20 × height/waist circumference) + (12 × sex); sex equals 0 for men and 1 for women. Obesity was diagnosed if RFM was 40% or higher for women and RFM was 30% or higher for men. CI denotes confidence interval.

† Absolute difference (prevalence in 2017-2020 minus the prevalence in 1999-2000).

‡ Adjusted for sex and ethnicity.

§ Adjusted for ethnicity.

**NHANES 1999-March 2020**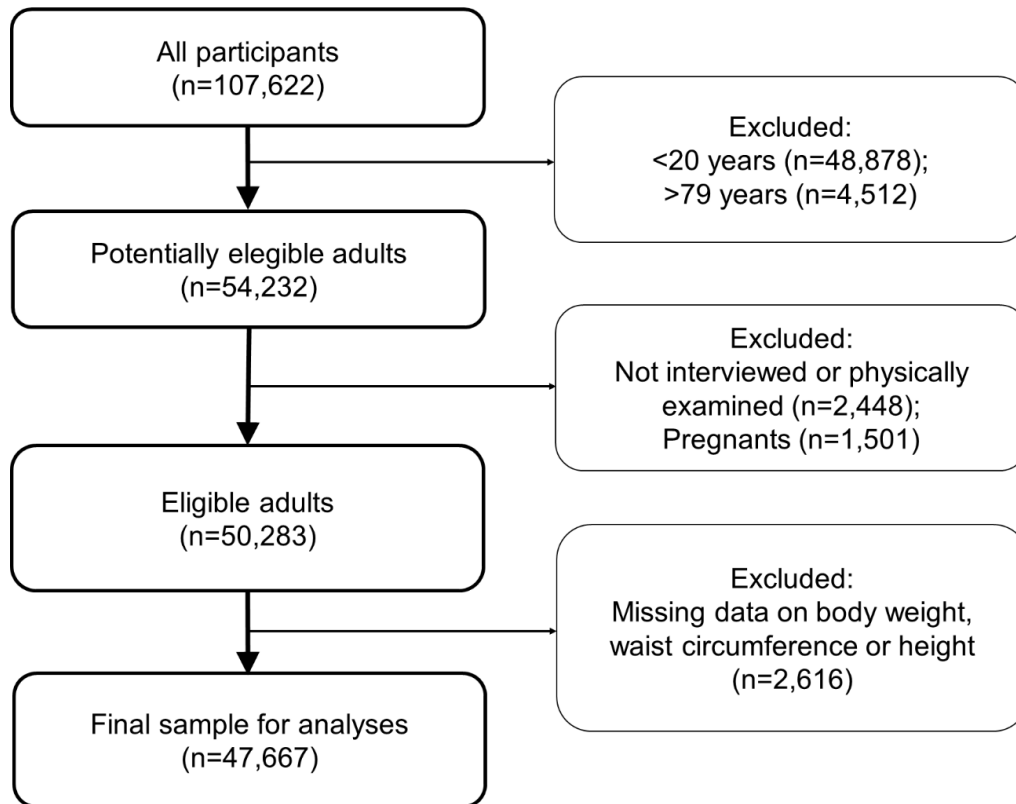**Supplemental Figure 1.** Selection of study participants.
